# Supplementary material
Source: PubMed Central journal article supplement (PMC2773985)
Supplement: 0906131106_Appendix_PDF.pdf [file 0906131106_Appendix_PDF.pdf]

## SUPPORTING INFORMATION

Mustroph et al. 10.1073/pnas.0906131106

### Supporting Results

**Cell/Region-Specific Polysomal mRNA Populations Are Distinct.** The data presented here indicate that cell/region-specific mRNA-ribosomes populations (translatomes) can be reproducibly isolated from individual cell types based on the use of cell- and region-specific promoters to drive *FLAG:RPL18* in Arabidopsis. The high correlation coefficients of Robust Multi-chip Average (RMA) signal values between biological replicates ( $r^2 = 0.93-0.99$ ; Dataset S1, sheet *g*) indicate that the immunopurification method is highly reproducible. This reproducibility extends to cell types that are a minor component of the organ, such as phloem companion cells (CC) and guard cells. Accordingly, hierarchical clustering of the RMA expression data revealed close proximity of replicates (Fig. S14). This basic clustering method confirmed that translatomes were distinguishable first by organ, then by growth condition and finally by cell type, leading to the conclusion that gene expression changes due to hypoxia were more pronounced than cell-type differences. This also showed that some shoot cell types [*i.e.* *pSUC2* (phloem CC), *pCER5* (epidermis)] still differed from each despite the reconfiguration of translation during the stress treatment.

***pGL2* and *pSultr2;2* Promoter Specificity.** Although most translatomes were consistent with expectations for the targeted cell types, *pGL2* and to a lesser extent *pSultr2;2* showed limited mRNA specificity. *pGL2* was expected to be localized in root atrichoblasts (1) and shoot trichomes (2). However, root *pGL2* mRNAs overlapped with those of *pSultr2;2* and *pSUC2* (Datasets S2 and S3, Fig. S5). There were only 33 genes significantly lower and 59

genes higher in *pGL2* than in *pSultr2;2* roots, and 52 and 94 genes in shoots, respectively, and *pGL2* and *pSultr2;2* samples clustered close together (Fig. S14). Confocal imaging of over 50 independent *pGL2:GFP-RPL18* transgenics confirmed expression of this promoter in atrichoblasts, but also revealed a low activity in the root vasculature (Fig. S1B). In aerial tissue, *pGL2* produced GFP-tagged ribosomes in trichomes and epidermal cells at the petiole base (Fig. S1A). Although 20 *pGL2*-enriched mRNAs were associated with epidermal-specific expression, 32 mRNAs were enriched in the phloem CC population (Dataset S2, sheet c). *pSultr2;2* transgenics showed expression limited to the vasculature in roots and shoots (Fig. S1C), but the overlap with shoot *pSUC2*-enriched mRNAs was lower than expected, whereas photosynthesis-associated mRNAs were elevated (Datasets S2 and S3). This pattern of mRNA enrichment is consistent with the documentation of *pSultr2;2* expression in shoot bundle sheath cells (3). The *pGL2* and *pSultr2;2* promoters may provide less unique mRNA populations because of expression in multiple cell types, emphasizing that promoters with robust expression are most desirable for cell-specific expression analyses. We treated the *pGL2* and *pSultr2;2* mRNA populations in the analysis of differentially expressed genes as they behaved in the microarray dataset and the GFP-tagged ribosome analysis, and not as predicted from the literature.

**Distribution of Ribosomal Protein mRNAs Within Cell Types and Organs.** Fuzzy k-means clustering of cell-type specific mRNAs under control conditions revealed two clusters enriched in ribosomal proteins (Fig. S5B; Dataset S3). The mRNAs encoding ribosomal proteins and translation factors were strongly enriched in clusters 38 (6.14E-56; 4.09E-33) and 77 (9.68E-19; 6.75E-08). Strikingly, mRNAs encoding components of the protein synthesis apparatus were depleted in the proliferating cells of the root (*pRPL11C*),

phloem CC (*pSUC2*) and maturation zone of the root cortex (*pPEP*). The low levels of ribosomal protein mRNAs in polysomes in the *pRPL11C* population was unexpected but provides further evidence that this cohort of mRNAs is translationally regulated in plants as observed in animals (4-6). Accordingly, reduced translation of ribosomal protein mRNAs was evident in most cell types of the root and shoot in response to hypoxia (cluster 58; Fig. S10B).

## Supporting Materials and Methods

**Generation of *promoter:HF-RPL18* and *promoter:HF-GFP-RPL18 Arabidopsis thaliana* Transgenic Lines.** The T-DNA binary vector pPZP111 (7) containing the CaMV 35S promoter and OCS3' terminator (pS119) was modified by replacement of the promoter region with the Gateway recombination cassette att1-cmR-ccdb-att2 (Invitrogen) by use of the *EcoRI* and *SacI* sites to produce pGATA-S119. The tobacco mosaic virus (TMV) omega 5' leader-HF-RPL18B (At3g05590) cassette described by Zanetti et al., (8) was amplified by standard polymerase chain reaction (PCR) to replace the *SacI* with *KpnI* (primers see Table S1) so that the product could be inserted into the *KpnI* and *XbaI* sites of pGATA-S119 (Fig. S1). The resultant vector construct, pGATA:HF-RPL18, was used for recombinational insertion of cell-type specific promoters upstream of the HF-RPL18 coding sequence. This construct includes the TMV omega 5' leader (66-bp) fused to an open reading frame that consists of M(H)<sub>6</sub>(G)<sub>3</sub>DYKDDDDK(the FLAG epitope)(G)<sub>7</sub> fused the 187 amino acid coding sequence of *RPL18B*.

The coding sequence of sGFP (9) was amplified from a plasmid (pCsGFPBT, GenBank accession: DQ370426), using forward primer GBamHIF: 5'- GAC TGG ATC CAT GGT GAG CAA GGG CGA GGA G -3' and reverse primer GBamHIR: 5'- GTC

AGG ATC CCT TGT ACA GCT CGT CCA TGC C -3'. The PCR product was digested with restriction enzyme *Bam*HI and inserted into p35S:HF-RPL18 (8) to form an in-frame fusion of p35S:HF-sGFP-RPL18. Additionally, a Gateway vector was constructed as follows: the TMV 5' leader-His<sub>6</sub>FLAG-GFP-RPL18B cassette from p35S:HF-sGFP-RPL18 was amplified by PCR using primers as described for pGATA:HF-RPL18. The PCR product and the vector pGATA:HF-RPL18 were digested with *Kpn*I and *Xba*I and ligated to form pGATA:HF-sGFP-RPL18. Maps of these construct are provided in Fig. S1 at the end of this section.

The destination vectors with gene 5' flanking regions were constructed as follows: promoter sequences were amplified by PCR from *Arabidopsis* genomic DNA by use of primers designed to bind just 5' of the initiator methionine and at the boundary of the nearest 5' gene. Forward primers had an additional 5'-CACC (Table S1). The amplified DNA fragments were cloned into the pENTR/D-TOPO vector (Invitrogen, Carlsbad, CA, USA). Following recombination into pGATA:HF-RPL18 or pGATA:HF-sGFP-RPL18, the sequence of the promoter and coding region were verified by cycle sequencing (Institute for Integrated Genome Biology Core Facility, University of California, Riverside). Binary T-DNA vectors were electroporated into *Agrobacterium tumefaciens* (strains LBA4404 (*pGATA:HF-RPL18*) or GV3101 (*pGATA:HF-sGFP-RPL18*)) and 6-wk-old *Arabidopsis thaliana* ecotype Columbia (*Col-0*) plants were transformed by the floral dip method (10). Transgenic lines were identified by selection on solid MS medium for kanamycin resistant seedlings and propagated on soil as previously described (8). Plants were cultivated in a growth chamber at 22 °C under long-day photoperiod (16 h 200  $\mu\text{E m}^{-2} \text{s}^{-1}$  light). The RPL18B fusion includes the His<sub>6</sub> and FLAG tags, but is referred to FLAG-RPL18 in the subsequent text.

**Establishment and Characterization of *p:FLAG-RPL18* Transgenics with a Single T-DNA Insertion.** FLAG-RPL18 expressing transgenic lines were identified by immunoblot analyses of crude seedling tissue extracts or by immunoprecipitation of the FLAG-tagged protein as described previously (8). Lines that showed an average level of positive expression were selected for further study. No abnormalities in seedling growth, plant development or fecundity were observed in the *p:FLAG-RPL18* transgenics. Lines were further characterized by evaluation of the copy number of T-DNA insertions and ultimately the site of insertion. Genomic DNA was isolated from rosette leaves from third-generation (T3)-plants as follows: 2 mL of frozen pulverized tissue was homogenized in 10 mL DNA Extraction Buffer [0.5 M NaCl, 200 mM Tris-HCl, pH 8.0, 100 mM EDTA, 2% (w/v) SDS], incubated at 65 °C for 30 min, extracted with one volume of chloroform-isoamyl alcohol (24:1), and centrifuged at 4,000 g for 15 min. The DNA in the supernatant was concentrated by isopropanol precipitation, and resuspended in 1 mL of 10 mM Tris-HCl, pH 8.0, 1 mM EDTA, containing RNase. After incubation for 30 min at 37 °C, the solution was extracted with phenol, and precipitated with ethanol. T-DNA insertion copy number in each candidate line was determined by Southern blot analysis by digestion of genomic DNA (20 µg) with *EcoRI*, *BamHI* or *XbaI*, transfer to nylon membranes and hybridization with an *OCS3'* fragment. For each *p:FLAG-RPL18* construct a line with a single site of T-DNA integration (or two sites in case of *pCER5*) was established. The site of T-DNA insertion was determined by thermal asymmetric interlaced PCR (TAIL-PCR) using arbitrary degenerate (AD) primers and three successive primers each from the left or right border of T-DNA (Table SI) essentially as described in ref. 11. TAIL-PCR products from the third amplification cycle were purified from an agarose gel by use of the QIAprep gel

purification kit (Qiagen) and directly sequenced using the Kan3 or RB3 primer. The site and orientation of the T-DNA insertion was identified by use of the BLAST alignment search tool (12) and the TAIR database. Sites of the T-DNA element insertions are provided in Table S2. Immunoblot analysis of sucrose gradient fractionated polysomes was used to confirm that the established lines accumulate FLAG-RPL18 in both small and large polysome complexes.

**Fluorescence Confocal Microscopy.** *p:FLAG-GFP-RPL18* transgenics were produced to verify the cell-type specific expression of each promoter. Seven-d-old kanamycin resistant T1 seedlings were evaluated for GFP fluorescence under a stereo-microscope (Leica MZ FL III; Leica Microsystems). At least 50 individual plants per promoter were observed. The location of GFP fluorescence was consistent for each promoter, although the intensity of fluorescence was variable. Since different independent lines were used, differences in the intensity of fluorescence might be due to different context of T-DNA insertion. T1 and T2 seedlings from four to eight individual lines were analyzed by confocal microscopy (Zeiss LSM 510; Carl Zeiss). Samples were excited with 488 nm (Argon Ion Laser), and fluorescence was detected (GFP filter: BP 500-550 IR; chlorophyll filter: LP 650). For the analysis of T2 seedlings, roots were briefly stained with 10  $\mu\text{g mL}^{-1}$  propidium iodide and cell walls were visualized by use of the chlorophyll-specific settings.

**Growth of Seedlings on Solid Medium and Oxygen Deprivation.** Seeds were surface sterilized by incubation for 5 min in 95 % (v/v) ethanol followed by 10 min in 20 % (v/v) bleach with 0.1 % (v/v) Tween-20, rinsed in sterile water, and imbibed at 4 °C for 3 d. Seeds were transferred to plates with solid MS media [0.43 % (w/v) Murashigi Skoog (MS)

salts (Sigma)], 0.4 % (w/v) phytigel (Sigma), 1 % (w/v) sucrose, pH 5.7), and placed at a vertical orientation in a growth chamber (Percival Scientific, Inc., model CU36L5C8) under long day conditions (16 h light at  $\sim 80 \mu\text{mol photons m}^{-2} \text{ s}^{-1}$ / 8 h darkness) at 23 °C. After 7 d, stress treatments were commenced after the end of the 16-h-day. Oxygen deprivation (hypoxia stress, HS) was imposed exactly as described by Branco-Price et al. (6). Briefly, plates were placed vertically in Lucite chambers into which 99.998 % (v/v) argon gas was pumped and allowed to exit under positive pressure. The time required to purge the chambers of air was about 1.5 h. This treatment deprives the plants of oxygen and carbon dioxide, thereby limiting both photosynthesis and aerobic respiration. For non-stress (NS) treatment, plates were placed in identical chambers open to ambient air. Both treatments were carried out under dim light (5 to 7  $\mu\text{mol photons m}^{-2} \text{ s}^{-1}$ ) at room temperature (23 to 25 °C). After 2 h of treatment tissues were harvested into liquid N<sub>2</sub>, pulverized, and stored at –80 °C. For one experiment set, the apical 1 cm of the root was harvested. For another experiment set, the root below the hypocotyl-root junction and the shoot were separately collected. Tissue harvest was accomplished within 3 min of removal from the treatment chamber.

**Measurement of Seedling ATP Content.** The *p35S:FLAG-RPL18* line was used to extract and analyze metabolite contents from roots and shoots of Arabidopsis plants after 2 h hypoxia. Five biological replicate samples were used to quantify ATP content as described in ref. 13.

**Quantitative Assessment of Polysomes.** Polysomes were obtained from extracts of seedling organs by pelleting through a sucrose cushion, further fractionation over sucrose

density gradients and quantified exactly as described by Branco-Price et al. (5). Four biological replicates were analyzed.

**Immunopurification of Ribosomes.** The immunopurification of ribosomes from *p:FLAG-RPL18* lines (individual 60S subunits, ribosomes and polysomes) was accomplished as described previously (6, 8) and further detailed in Mustroph et al. (14). Briefly, frozen tissue was homogenized in Polysome Extraction Buffer (PEB; 200 mM Tris-HCl, pH 9.0, 200 mM KCl, 25 mM ethylene glycol tetraacetic acid (EGTA), 36 mM MgCl<sub>2</sub>, 1% (v/v) octylphenyl-polyethylene glycol (Igepal CA-630), 1% (v/v) polyoxyethylene(23) lauryl ether (Brig 35), 1% (v/v) Triton X-100, 1% (v/v) Tween-20, 1% (v/v) polyoxyethylene 10 tridecyl ether, 1% (v/v) sodium deoxycholate, 1 mM dithiothreitol (DTT), 50 µg mL<sup>-1</sup> cycloheximide, 50 µg mL<sup>-1</sup> chloramphenicol, 0.5 mg mL<sup>-1</sup> heparin) using 2.5 mL PEB per mL tissue. A typical extraction was 2 to 3 ml packed volume of frozen pulverised root or root tip tissue or 4 to 6 mL shoot tissue. Homogenates were clarified by centrifugation at 16,000 g for 15 min and filtrated with cheesecloth. An aliquot of 600 µL of the supernatant was reserved for isolation of total RNA. To the remaining supernatant 150 µL of EZ-View anti-FLAG agarose beads (Sigma) were added and incubated at 4 °C for 2 h with gentle shaking. The beads were recovered by centrifugation at 3,500 g, and washed four times for 5 min each with 6 mL of wash buffer (200 mM Tris-HCl, pH 9.0, 200 mM KCl, 25 mM EGTA, 36 mM MgCl<sub>2</sub>, 5 mM DTT, 50 µg mL<sup>-1</sup> cycloheximide, 50 µg mL<sup>-1</sup> chloramphenicol). Polysomes were eluted by resuspension of the washed beads in 300 µL of wash buffer per 100 µl beads that additionally contained 20 U mL<sup>-1</sup> of RNase inhibitor (Promega) and 200 µg mL<sup>-1</sup> of [FLAG]<sub>3</sub> peptide (Sigma) at 4 °C for 30 min.



RNA extraction was performed by addition of two volumes of 8 M guanidine-HCl and three volumes of ethanol to the cleared eluate, incubation overnight at  $-20\text{ }^{\circ}\text{C}$  and pelleting by centrifugation at  $15,000\text{ }g$  for 45 min. RNA samples were further purified using RNeasy columns (Qiagen) as described previously (6). The yield of RNA obtained by immunoprecipitation of ribosome complexes varied in the different *p:FLAG-RPL18* lines, from 1 ng per mL tissue for *pKAT:FLAG-RPL18* to 1  $\mu\text{g}$  per mL tissue for *p35S:FLAG-RPL18*. Total RNA was extracted in the same manner from the reserved cell lysate.

**RNA Quantitation, cDNA Amplification and DNA Microarray Hybridizations.** Total and immunopurified RNA yields were quantified by use of a NanoDrop ND-1000 UV-Vis Spectrophotometer according to the manufacture's instructions (Nanodrop Technology). RNA quality was assessed using an Agilent 2100 Bioanalyzer with either RNA 6000 Nano or Pico Assay reagent kits (Agilent Technology). Only samples with no signs of rRNA degradation were used to generate probes. For the root-tip mRNA samples, hybridization probe preparation included two linear rounds of target amplification from 400 pg of total or immunopurified RNA using the TargetAmp 2-Round Aminoallyl aRNA Amplification kit 1.0 according to the manufacturer's instructions (Epicenter Biotechnologies). The biotinylated aRNA was purified by use of an RNeasy spin column (Qiagen), quantified by detection of  $A_{260}/A_{280}$  with the Nanodrop spectrophotometer and further evaluated with the Agilent Bioanalyzer. For the whole root and shoot mRNA samples, hybridization probe preparation included a two-step-amplification from 15 to 100 ng RNA by use of the Affymetrix protocol. Biotin-labeled cRNA was synthesized using the GeneChip IVT Labeling Kit (Affymetrix). Hybridizations against Arabidopsis ATH1 Genome Array (GeneChip System; Affymetrix) chips were performed at  $45\text{ }^{\circ}\text{C}$  for 16 h, in a rotating

platform, using 12  $\mu\text{g}$  of biotin-labeled cRNA. Hybridizations were performed by the Institute for Integrated Genome Biology Core Facility, University of California, Riverside.

**Expression Data Analyses.** CEL files from the Affymetrix Chips were processed by use of the R program and Bioconductor packages (15). The Robust Multi-chip Average (RMA) normalization was performed using the default settings of the corresponding R function (16), together with previously published CEL files from a closely related experiment (6) (Dataset S1, sheet *d*). To estimate the amount of expressed mRNA, the present call information of the non-parametric Wilcoxon signed rank test (PMA values, 17) was computed with the “affy” package (18) (Dataset S1, sheet *a*). Hybridization data from at least two biological replicates were generated for each *p:FLAG-RPL18* line, tissue sample and treatment. The degree of correlation between hybridizations of biological replicate samples was generated from the RMA normalized signal values ( $R^2$  values, Dataset S1, sheet *g*). RMA-normalized samples were hierarchically clustered by the R-function HCLUST using complete linkage as the cluster joining method and Pearson correlation coefficients as similarity measure (Fig. S14).

The ATH1 Genome Array microarray platform that was utilized for this study is available at the GEO (Gene Expression Omnibus) data repository under accession number GPL198. The microarray experiments reported here are described following MIAME guidelines and deposited in GEO under the accession numbers GSE14493 and GSE14502 in the superSeries GSE14578.

**Differential Gene Expression Analysis of Cell-Type Specific Genes.** Analysis of

differentially expressed genes (DEGs) was performed with the LIMMA package using the RMA normalized expression values (19). The Benjamini and Hochberg method was selected to adjust P-values for multiple testing and to determine false discovery rates (FDRs) (20). As confidence threshold, an FDR of <0.01 was used.

To identify mRNAs enriched in specific cell types, the following systematic comparisons were performed: immunopurified RNA of control or hypoxia stressed samples were compared to all other non-overlapping cell types in the same organ and under the same treatment conditions. The complete list of comparisons is provided in Dataset S2, sheet *a*. Genes were deemed as significantly enriched or depleted in a specific cell type (mRNA population) if the following criteria were met: >2-fold change and FDR <0.01 for each pairwise comparison. Subsequently, the overlap of the significantly enriched or depleted gene lists for each cell type was recorded (Dataset S2, sheet *a*). In addition to the gene lists, the mean of the signal-log-ratios (SLRs) and the FDRs of utilized comparisons for each cell type were calculated (Dataset S2, sheet *a*). Because of partial overlap in expression of some promoters in certain cell types (for example stele: *pSHR* and *pWOL* mRNA populations partially overlap with *pSUC* and *pSultr2;2* mRNA populations; epidermis: *pKAT*, *pGL2* and *pCER5* mRNA populations partially overlap with each other), two comparison stringencies were used for root stele and most shoot samples.

For the comparison of the mRNAs enriched in specific cell types with published microarray data, publicly available CEL files (21-25) were analyzed using the pipeline described above. The RMA normalization step was always applied to samples published as one experiment. The LIMMA DEG analysis was performed as a comparison of each specific shoot cell type against the corresponding control dataset (21-24), or with the queries described in Dataset S4, sheet *c* in the style of the analysis of our own data (25).

Comparisons of overlap between published data and our data are found in Datasets S2 and S4.

**Identification of Co-Expression Patterns Across Cell Types and Organs by Fuzzy k-Means Clustering.** Data were analyzed by fuzzy k-means clustering with the *fanny* function from the *cluster* package in R. For this analysis, the means of biological replicates of RMA-normalized data were used. Genes were removed from the dataset if they encoded mitochondrial or plastid transcripts, or if they were not called as present by MAS5 in any sample pair (P in all replicates of one sample type, across organs, cell types and stress treatments). Furthermore, data were filtered prior to clustering by removing any genes that did not show at least a 2-fold difference over the mean across all measurements. This filtering retained 11,273 of the 17,468 present genes. The settings for the FANNY algorithm were the following: distance measure = (1 - Pearson correlation), number of clusters = 60, membership exponent = 1.1, maximal number of iterations = 5000, according to Brady et al. (25). Preliminary runs established that the membership exponent and cluster number were in the appropriate range for the dataset. Following the clustering the groups were reduced from 60 to 59 clusters by collapsing with a Pearson correlation coefficient larger of 0.95 as described previously (25, 26). The fuzzy algorithm was applied for the whole control treatment (non-stress) dataset and independently for the hypoxia treatment dataset, to avoid disturbing influences of the stress treatment on the cluster formation. After fuzzy clustering, the median expression values of the clusters were calculated as described previously (25, 26). For this, all genes with a cluster coefficient >0.4 were assigned to the corresponding cluster. Because the coefficient can take values from 0 to 1 for each cluster

assignment and sums to 1 across all clusters, this setting allowed each gene to be part of a maximum of 2 clusters. For easier visualization, the RMA values were transformed before median calculation by the scale function in the R package “base”. The control dataset resulted in 59 final clusters. Final gene-to-cluster assignments are given in Dataset S3. Expression medians and clusters were visualized with the TIGR MEV program.

**Differential Expression Analysis of Hypoxia-Induced Genes.** RMA-normalized expression data from immunopurified RNA from a cell-specific promoter line under hypoxia was compared with the same line under control conditions by use of Limma (Dataset S5). Criteria for the selection of significantly induced or reduced genes due to the stress were the same as described for the cell-type comparison. The overlap of genes that were significantly induced or reduced in all cell types of one organ was recorded as the “core response”. Several approaches were used to identify mRNAs with a different response to hypoxia in specific cell types.

To find general patterns of response to hypoxia, fuzzy k-means clustering was performed with all genes that showed differential expression due to hypoxia as determined by the Limma analysis described above. As for the cell-type fuzzy clustering, RMA normalized mean values were used, but control and hypoxia datasets were combined. The settings for the FANNY algorithm and the cluster post-processing were the same as above, with the exception that the number of clusters was 100 instead of 60. The final gene-to-cluster assignments are given in Dataset S6.

Both analyses described above revealed that many hypoxia-induced mRNAs were induced in all cell types examined, whereas the hypoxia-reduced mRNAs were more cell type specific. To recognize cell-types distinctions in hypoxia response, all mRNAs that

were enriched in a specific cell-type under control conditions (Dataset S2) AND displayed significantly lower expression under hypoxia in that cell type were tabulated (Dataset S3). Those gene lists demonstrate the loss of cell specific gene expression during hypoxic stress.

To identify mRNAs that showed a significantly different response to hypoxia in a specific cell-type as compared to other non-overlapping cell types, DEG analysis was used to compare the SLR of hypoxia versus control for one cell type to the SLR between hypoxia and control of other non-overlapping cell types. The formula for the contrast matrix was:  $(H\_CT1-C\_CT1)-(H\_CT2-C\_CT2)$ , where CT is cell type. Dataset S7 records the comparisons used and the overlap of gene lists for all comparisons.

**GO Analyses.** The specific gene lists obtained by the Limma and fuzzy k-mean clustering analyses were evaluated for enrichment of genes with specific biological function, molecular process or subcellular component annotations. Enrichment analyses of Gene Ontology (GO) terms were performed as described in Horan et al. (27). In summary, the Arabidopsis gene-to-GO mappings from TAIR (available at <http://geneontology.org>; downloaded June 25, 2008) were used for these analyses. The hypergeometric distribution was applied to test gene sets for the overrepresentation of GO terms. To perform this test, the GOHyperGAll function was used (see refs. 27 and 28), which computes for a given sample population of genes the enrichment test for all nodes in the GO network, and returns raw and adjusted p-values. As an adjustment method for multiple testing, it uses the Bonferroni method according to Boyle et al. (29). GO categories with an adjusted P-value <0.05 were deemed significantly enriched. To remove nested GO terms, we enabled the “simplify” step of the GOHyperGAll function. GO enrichment lists can be found in

Datasets S2, S3, S5, S6, and S7. Because of the nature of the P-value calculations, clusters or gene lists with <10 members were not analyzed.

Members of transcription factor families were obtained from TAIR (available at [www.arabidopsis.org](http://www.arabidopsis.org); accessed October 2, 2008) and AGRIS (30). The exact TF family to gene assignment is included in Dataset S2, sheet *a*. The TF family enrichment of gene lists and clusters was calculated with the GOHyperGAll function. The results of this analysis can be found in Datasets S2, S3, S5, S6, and S7. Enrichment of binding sites for transcription factors was determined for specific gene lists for the –1,000 bp promoter region by use of the online tool Athena with the default settings.

1. Masucci JD, et al. (1996) The homeobox gene GLABRA2 is required for position-dependent cell differentiation in the root epidermis of *Arabidopsis thaliana*. *Dev* 122:1253-1260.
2. Szymanski DB, Jilk RA, Pollock SM, Marks MD (1998) Control of GL2 expression in *Arabidopsis* leaves and trichomes. *Dev* 125:1161-1171.
3. Takahashi H, et al. (2000) The roles of three functional sulphate transporters involved in uptake and translocation of sulphate in *Arabidopsis thaliana*. *Plant J* 23:171-182.
4. Kawaguchi R, Bailey-Serres J (2005) mRNA sequence features that contribute to translational regulation in *Arabidopsis*. *Nuc Acids Res* 33:955-965.
5. Branco-Price C, Kawaguchi R, Ferriera R, Bailey-Serres J (2005) Genome-wide analysis of transcript abundance and translation in *Arabidopsis* seedlings subjected to oxygen deprivation. *Ann Bot* 96:647-660.
6. Branco-Price C, Kaiser KA, Jang CJ, Larive CK, Bailey-Serres J (2008) Selective mRNA translation coordinates energetic and metabolic adjustments to cellular oxygen deprivation and reoxygenation in *Arabidopsis thaliana*. *Plant J* 56:743-755.

7. Hajdukiewicz P, Svab Z, Maliga P (1994) The small, versatile pPZP family of Agrobacterium binary vectors for plant transformation. *Plant Mol Biol* 25:989-994.
8. Zanetti ME, Chang I-F, Gong F-C, Galbraith DW, Bailey-Serres J (2005) Immunoaffinity purification of polyribosomal complexes of Arabidopsis for global analysis of gene expression. *Plant Physiol* 138:624-635.
9. Chiu W, et al. (1996) Engineered GFP as a vital reporter in plants. *Current Biol* 6:325-330.
10. Clough SJ, Bent AF (1998) Floral dip: a simplified method for Agrobacterium-mediated transformation of *Arabidopsis thaliana*. *Plant J* 16:735-743.
11. Liu YG, Mitsukawa N, Oosumi T, Whittier RF (1995) Efficient isolation and mapping of *Arabidopsis thaliana* T-DNA insert junctions by thermal asymmetric interlaced PCR. *Plant J* 8:457-463.
12. Altschul SF, Gish W, Miller W, Myers EW, Lipman DJ (1990) Basic local alignment search tool. *J Mol Biol* 215:403-410.
13. Mustroph A, et al. (2006) Organ-specific analysis of the anaerobic primary metabolism in rice and wheat seedlings. I: Dark ethanol production is dominated by the shoots. *Planta* 225:103-114.
14. Mustroph A, Juntawong P, Bailey-Serres J (2009) Isolation of plant polysomal mRNA by differential centrifugation and ribosome immunopurification methods. *Methods in Molecular Biology: Plant Systems Biology*, in press.
15. Gentleman R, et al. (2004) Bioconductor: Open software development for computational biology and bioinformatics. *Genome Biol* 5:R80.
16. Irizarry RA, et al. (2003) Summaries of Affymetrix GeneChip probe level data. *Nucleic Acids Res* 31:e15.



17. Liu WM, et al. (2002) Analysis of high density expression microarrays with signed-rank call algorithms. *Bioinformatics* 18:1593-1599.
18. Gautier L, Cope L, Bolstad BM, Irizarry RA (2004) Affy--analysis of Affymetrix GeneChip data at the probe level. *Bioinformatics* 20:307-315.
19. Smyth GK (2004) Linear models and empirical bayes methods for assessing differential expression in microarray experiments. *Stat Appl Genet Mol Biol* 3:Article3.
20. Benjamini Y, Hochberg Y (1995) Controlling the false discovery rate: a practical and powerful approach to multiple testing. *J Roy Statist Soc B* 57:289-300.
21. Suh MC, et al. (2005) Cuticular lipid composition, surface structure, and gene expression in Arabidopsis stem epidermis. *Plant Physiol* 139:1649-1665.
22. Yang Y, Costa A, Leonhardt N, Siegel RS, Schroeder JI (2008) Isolation of a strong Arabidopsis guard cell promoter and its potential as a research tool. *Plant Methods* 4:6.
23. Jakoby MJ, et al. (2008) Transcriptional profiling of mature Arabidopsis trichomes reveals that NOECK encodes the MIXTA-like transcriptional regulator MYB106. *Plant Physiol* 148:1583-1602.
24. Zhao C, Craig JC, Petzold HE, Dickerman AW, Beers EP (2005) The xylem and phloem transcriptomes from secondary tissues of the Arabidopsis root-hypocotyl. *Plant Physiol* 138:803-818.
25. Brady SM, et al. (2007) A high-resolution root spatiotemporal map reveals dominant expression patterns. *Science* 318:801-806.
26. Orlando DA, Brady SM, Koch JD, Dinneny JR, Benfey PN (2009) Manipulating large scale Arabidopsis microarray expression data: Identifying dominant expression patterns and biological process enrichment. *Methods in Molecular Biology: Plant Systems Biology*, in press.

27. Horan K, et al. (2008) Annotating genes of known and unknown function by large-scale coexpression analysis. *Plant Physiol* 147:41-57.
28. Falcon S, Gentleman R (2007) Using GOstats to test gene lists for GO term association. *Bioinformatics* 23:257–258.
29. Boyle EI, et al. (2004) GO::TermFinder--Open source software for accessing Gene Ontology information and finding significantly enriched Gene Ontology terms associated with a list of genes. *Bioinformatics* 20:3710-3715.
30. Davuluri RV, et al. (2003) AGRIS: Arabidopsis Gene Regulatory Information Server. An information resource of Arabidopsis cis-regulatory elements and transcription factors. *BMC Bioinformatics* 4:25. Available at <http://arabidopsis.med.ohio-state.edu>. Accessed October 2, 2008.
31. Wysocka-Diller JW, Helariutta Y, Fukaki H, Malamy JE, Benfey PN (2000) Molecular analysis of SCARECROW function reveals a radial patterning mechanism common to root and shoot. *Dev* 127:595-603.
32. Helariutta Y, et al. (2000) The SHORT-ROOT gene controls radial patterning of the Arabidopsis root through radial signaling. *Cell* 101:555-567.
33. Estelle M (2001) Cytokinin receptor: Just another histidine kinase. *Curr Biol* 11:271-273.
34. Heidstra R, Welch D, Scheres B (2004) Mosaic analyses using marked activation and deletion clones dissect Arabidopsis SCARECROW action in asymmetric cell division. *Genes & Dev* 18:1964-1969.
35. Mace DL, et al. (2006) Quantification of transcription factor expression from Arabidopsis images. *Bioinformatics* 22:e323-e331.

36. Williams ME, Sussex IM (1995) Developmental regulation of ribosomal protein L16 genes in *Arabidopsis thaliana*. *Plant J* 8:65-76.
37. Imlau A, Truernit E, Sauer N (1999) Cell-to-cell and long-distance trafficking of the green fluorescent protein in the phloem and symplastic unloading of the protein into sink tissues. *Plant Cell* 11:309-322.
38. Pighin JA, et al. (2004) Plant cuticular lipid export requires an ABC transporter. *Science* 306:702-704.
39. Nakamura RL, et al. (1995) Expression of an *Arabidopsis* potassium channel gene in guard cells. *Plant Physiol* 109:371-374.
40. Donald RG, Cashmore AR (1990) Mutation of either G box or I box sequences profoundly affects expression from the *Arabidopsis* rbcS-1A promoter. *EMBO J* 9:1717-1726.
41. Scharf KD, Siddique M, Vierling E (2001) The expanding family of *Arabidopsis thaliana* small heat stress proteins and a new family of proteins containing alpha-crystallin domains (Acd proteins). *Cell Stress Chaperones* 6:225-237.
42. Nakano T, Suzuki K, Fujimura T, Shinshi H (2006) Genome-wide analysis of the ERF gene family in *Arabidopsis* and rice. *Plant Physiol* 140:411-432.

**SI Methods Fig. S1.** T-DNA insertions used in this study. Maps include GATA site for promoter insertion and selected restriction sites. (A) *p35S:HF-RPL18*; (B) *pGATA:HF-RPL18*; (C) *pGATA:HF-GFP-RPL18*. HF = His-FLAG-tag; OCS = OCS terminator; NPTII = Kanamycin resistance gene; LB = left border of T-DNA; RB = right border of T-DNA; 35Sm, 820 nt CaMV 35S promoter; numbers: estimated nucleotide lengths of DNA sequences. Arrows indicate direction of transcription.

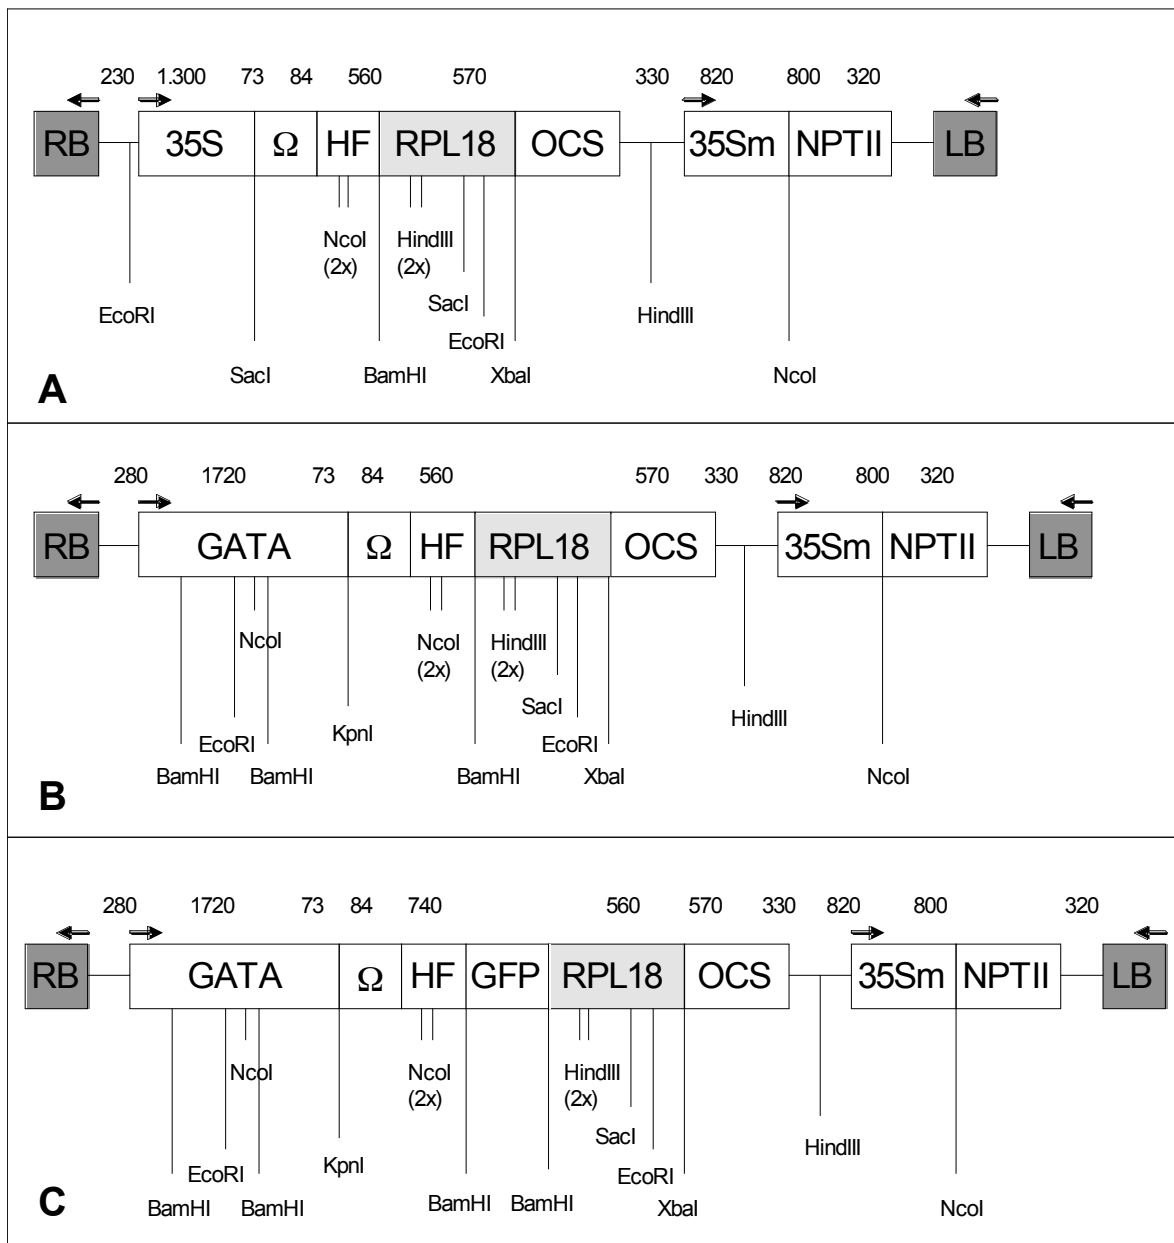

**Fig. S1.** Representative images demonstrating the specificity of promoter activity in T1 and T2 transgenics produced for each of the cell/region specific promoters. Individual promoters were used to drive the production of FLAG-GFP-RPL18 in transgenic Arabidopsis. Over 50 T1 seedlings (7-d-old) produced from multiple plants were evaluated to confirm that the expression pattern of each promoter was consistent. Promoter activity was re-evaluated in the T2 generation. All of the promoters showed highly consistent expression patterns. Green = GFP fluorescence, red = chlorophyll in shoots, Propidium iodide staining in roots. (Scale bar, 50  $\mu$ m.) (A) Aerial organs. (B) Roots. For each row, the following sections of the roots are shown from left to right: root tip region; higher magnification of propidium iodide stained root tip image; root maturation zone, with lateral root primordia; transverse section through elongation zone for selected lines. Transverse sections are optical sections through the intact root by confocal microscopy. (C) Roots. For each row, the following sections of the roots are shown from left to right: root maturation zone; higher magnification of propidium iodide stained root maturation zone image; root tip; optical transverse section through root maturation zone. (D) Subcellular localization of GFP-tagged ribosomes in a *p35S:FLAG-GFP-RPL18* transgenic. As would be expected for a RP, GFP is localized in the cytoplasm and enriched in the nucleoli (white arrows) as represented by a (i) leaf mesophyll cell and (ii) root epidermis cell.

**Fig. S1A**

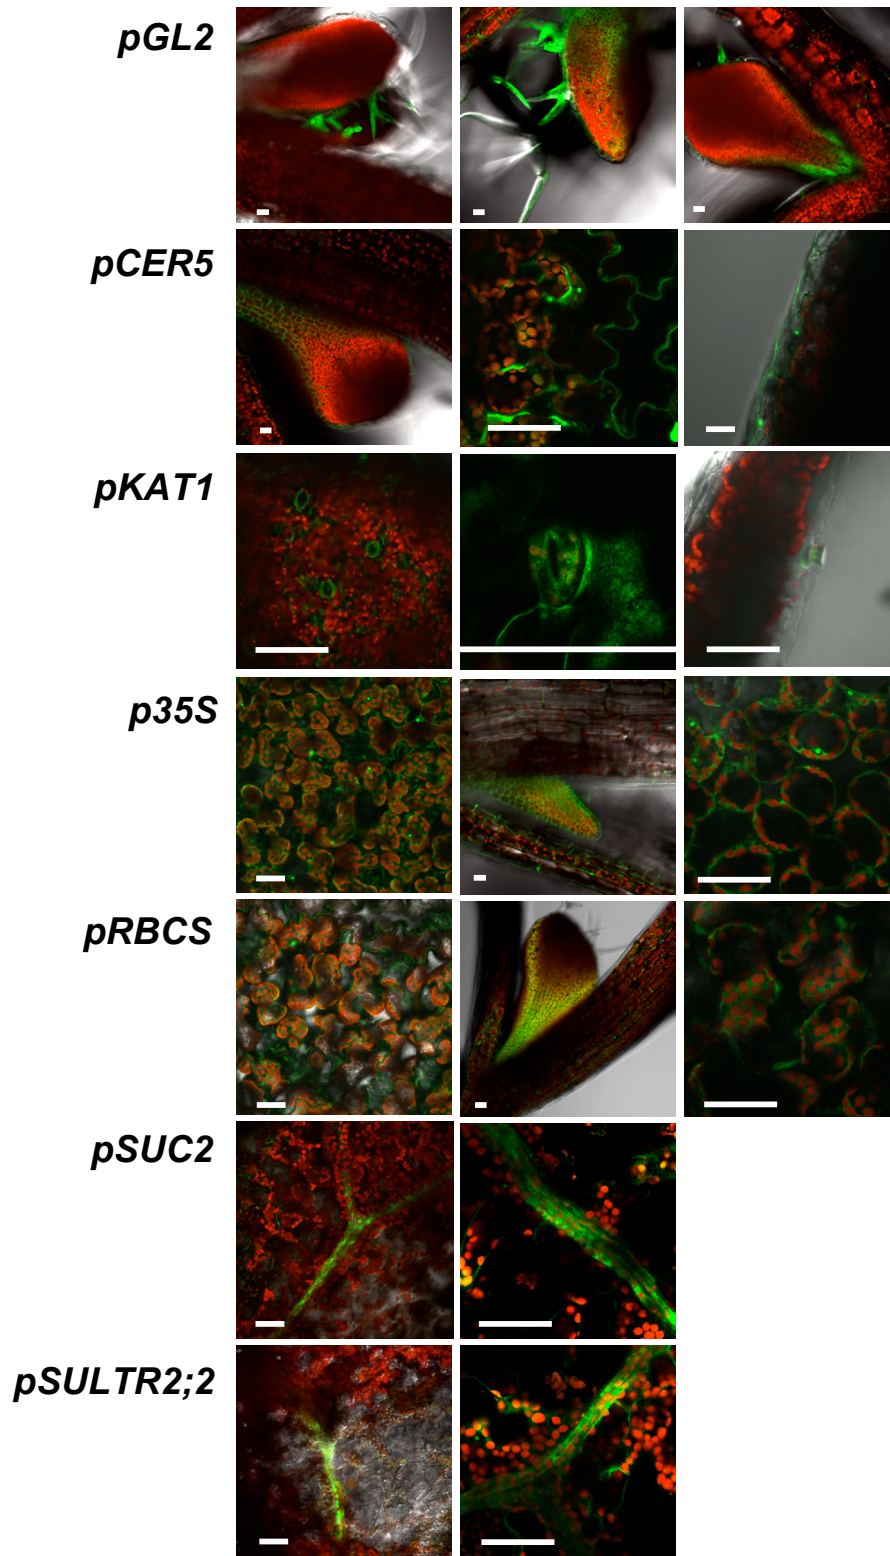

**Fig. S1B**

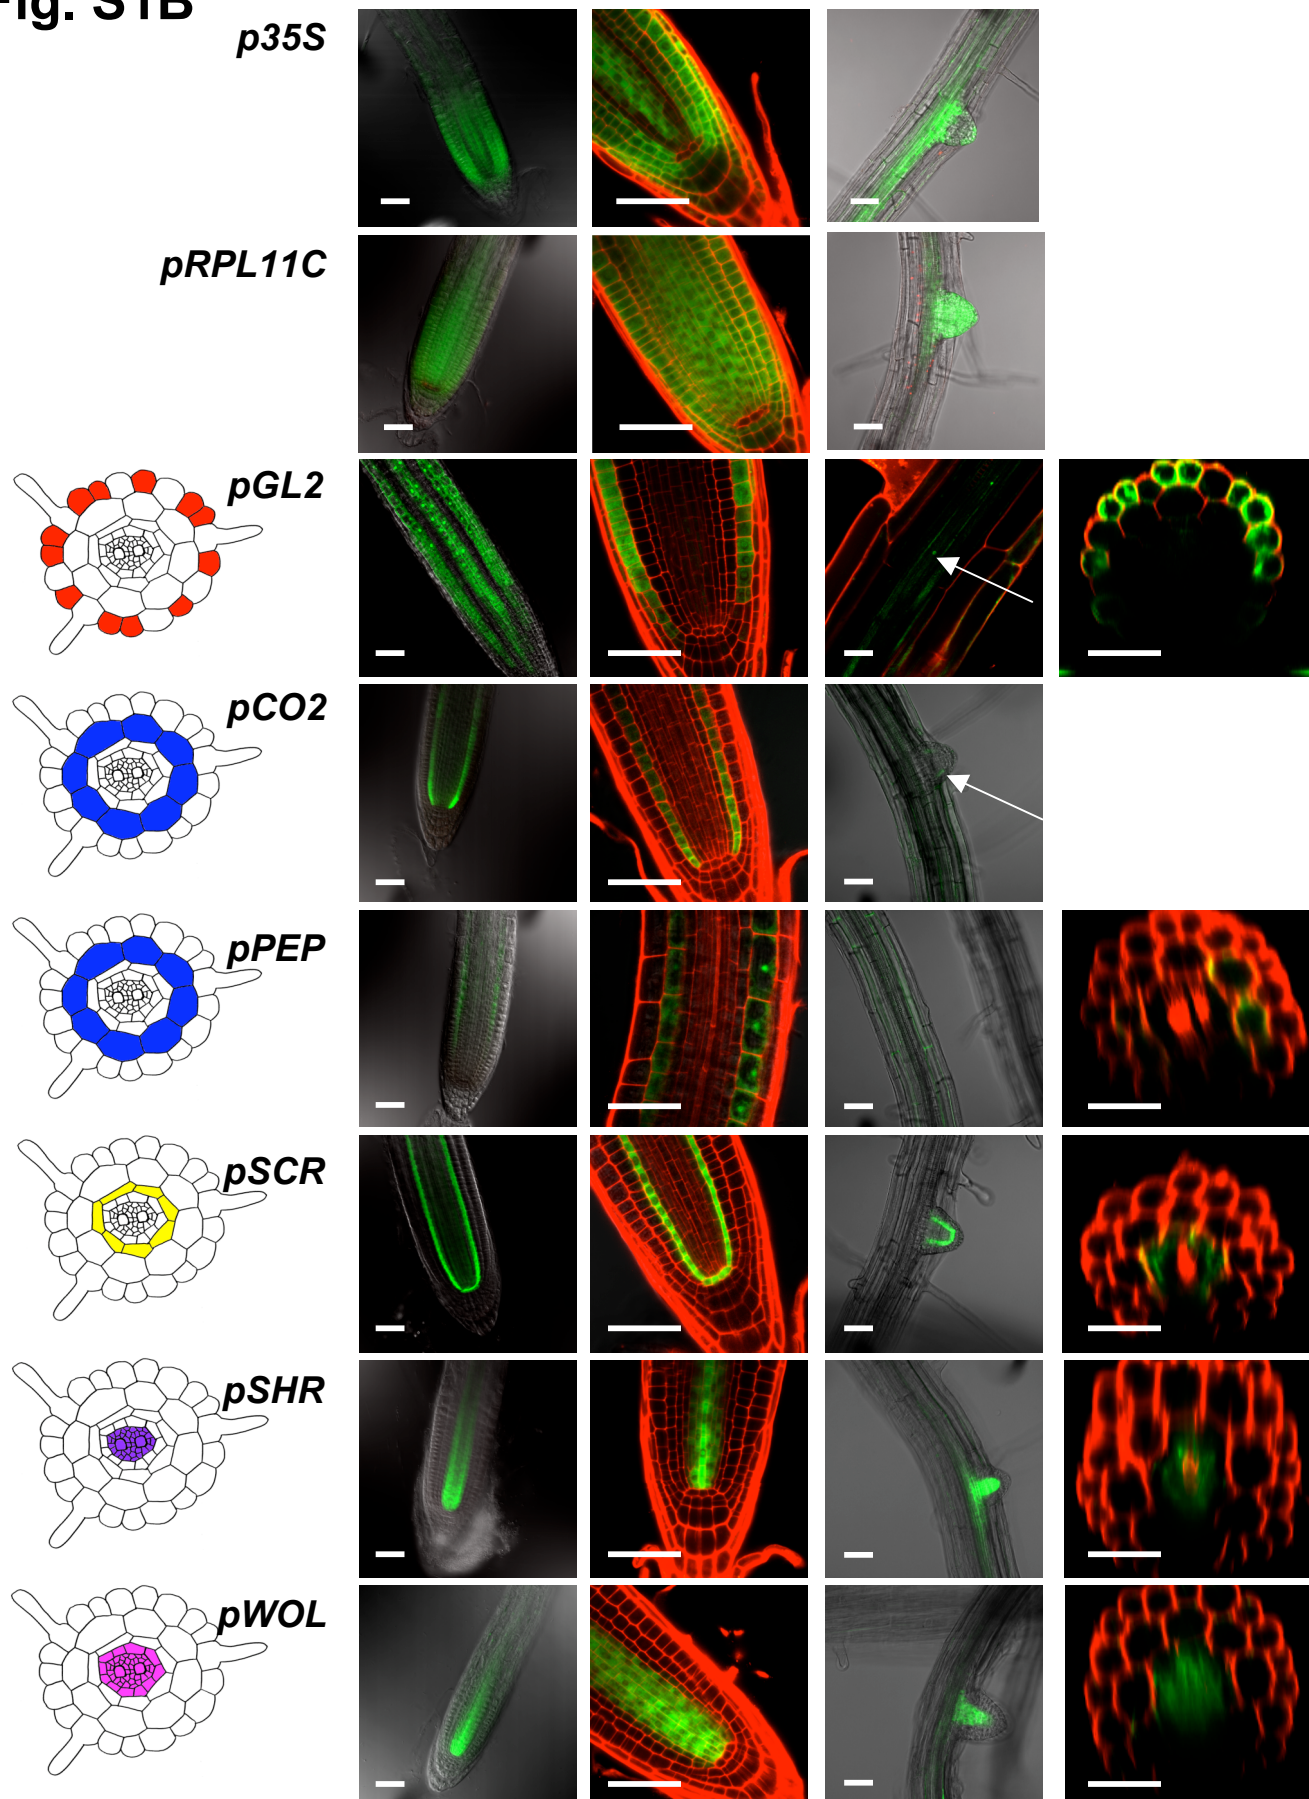

**Fig. S1C, D**

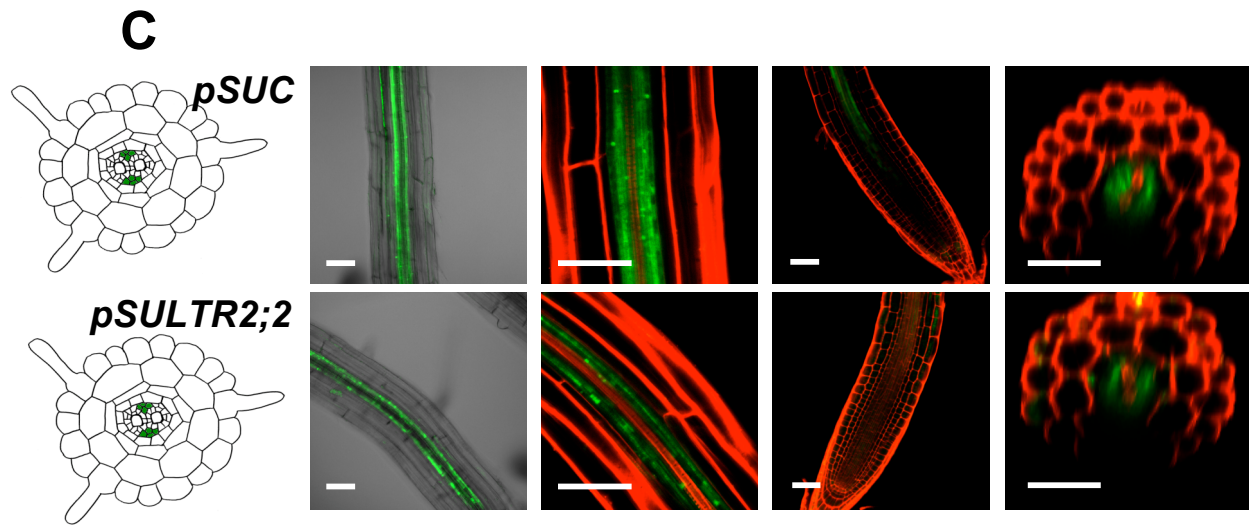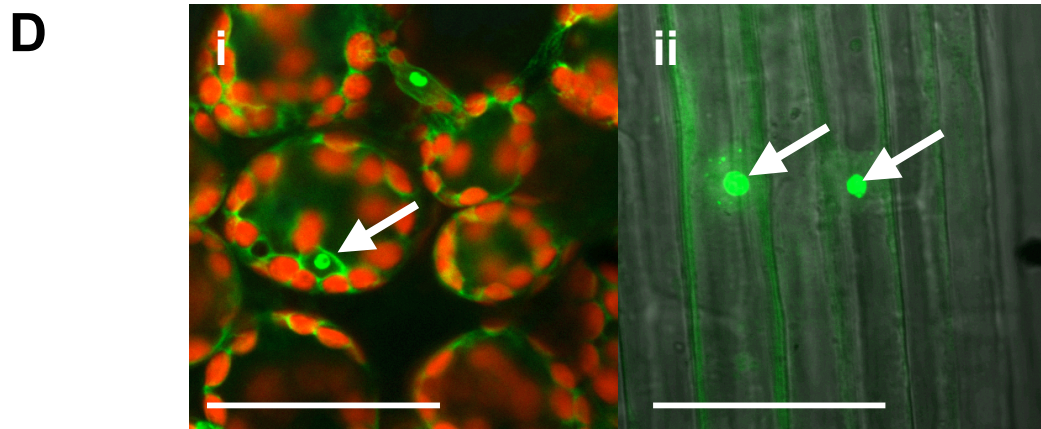



**Fig. S2.** Immunopurified polysomal mRNA populations obtained from two distinct *pGL2:FLAG-RPL18* transgenic lines are highly correlated. (A) Schematic of the insertion site of T-DNA in each transgenic line determined by TAIL-PCR; (B) Correlation between probe pair set signal values for polysomal mRNA from 7-d-old seedlings of the two *pGL2:FLAG-RPL18* lines. (C) Correlation between probe pair set signal values for polysomal mRNA from 7-d-old seedlings of *pGL2:FLAG-RPL18-1* from two independent biological replicate experiments.

**Fig. S2**

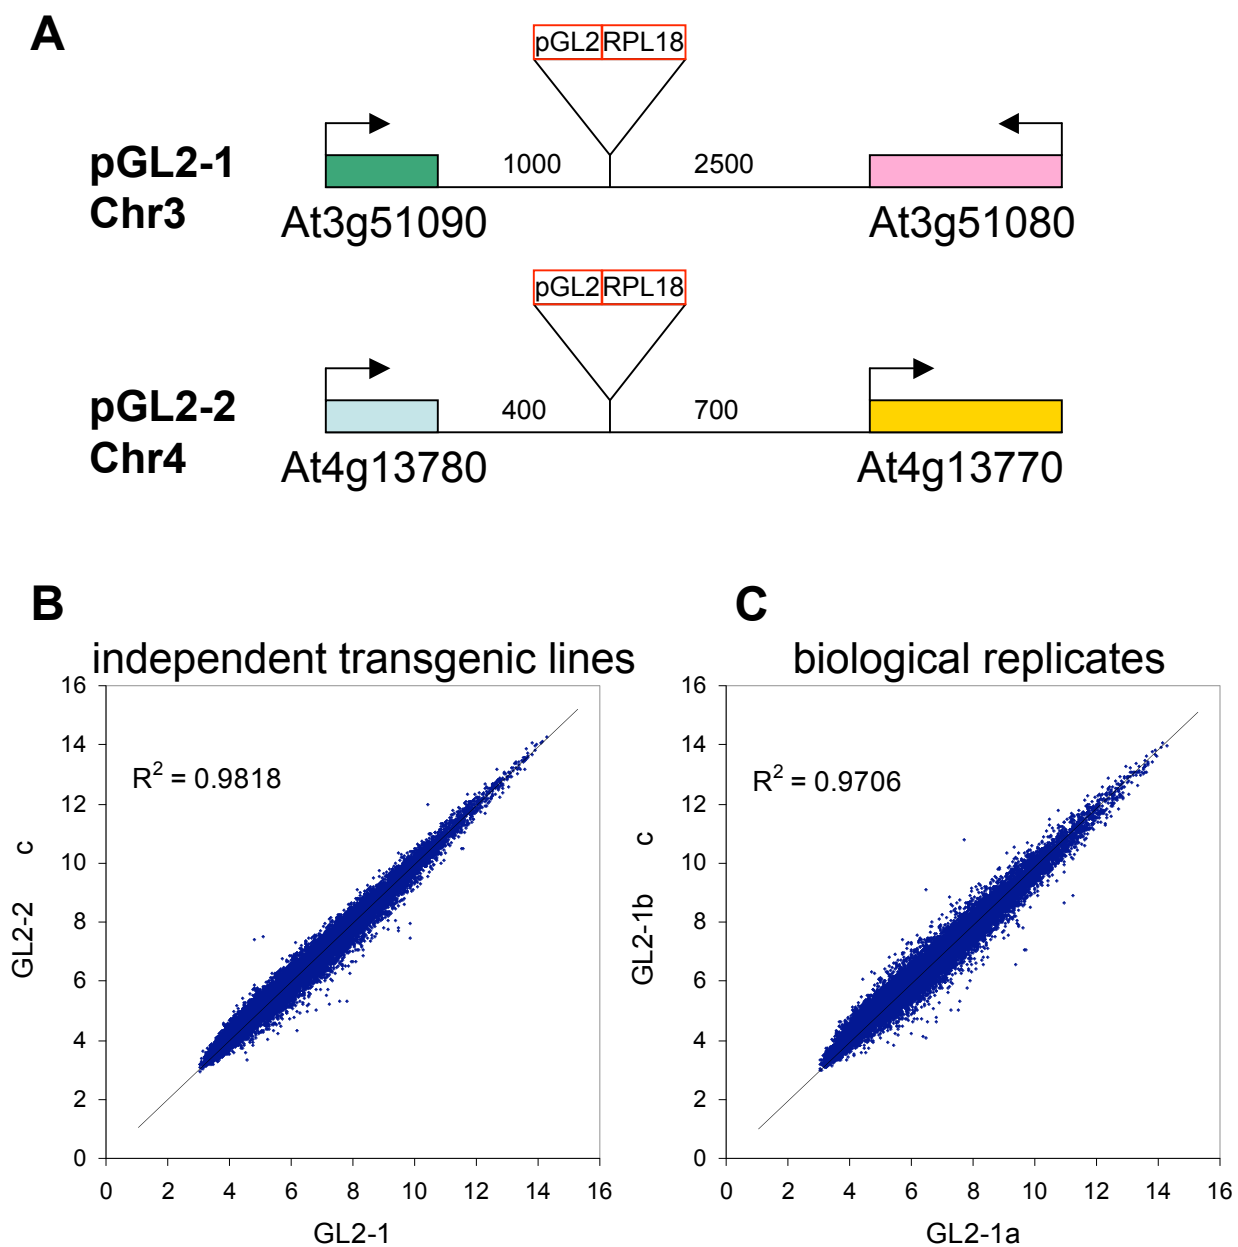

**Fig. S3.** Overview of isolation of RNA populations and post-hybridization analyses. Computational analysis of microarray data. \*1 – comparisons made: cell type versus subsets of non-overlapping cell types (see Dataset S2 for details) of one organ of control and hypoxic stressed seedlings. \*2 – for each cell type, hypoxia was compared to aerated control.

**Fig. S3**

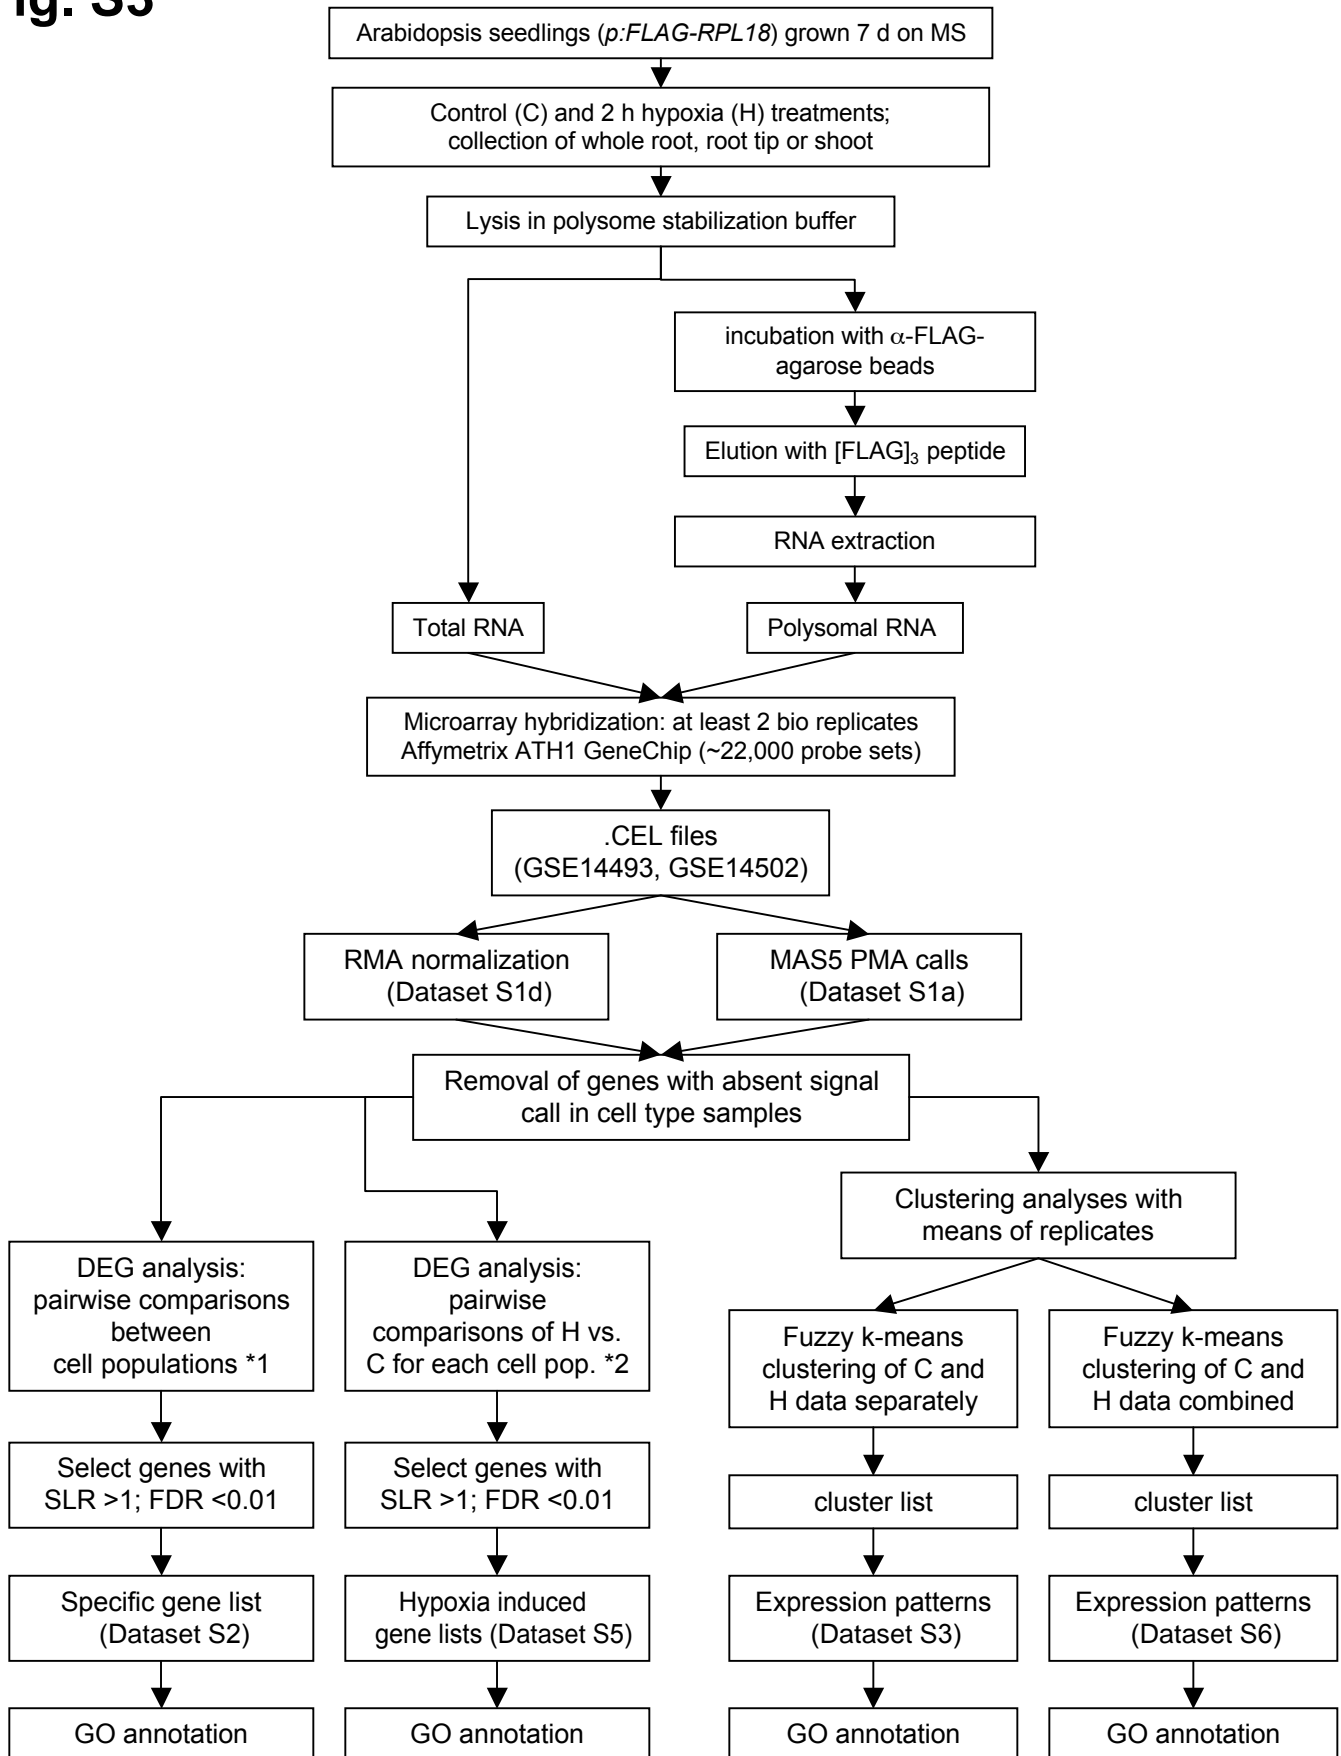

**Fig. S4.** Data display available on the eFP browser. Absolute expression values (MAS5 normalized) and SLRs from the differential gene expression analysis (from RMA-normalized data, see Dataset S2, sheet *a*) can be visualized on a gene-by-gene basis using the eFP platform (currently accessible at <http://bioinfo.ucr.edu/~cjang/cgi-bin/absolute.cgi> for absolute (MAS5) values and at <http://bioinfo.ucr.edu/~cjang/cgi-bin/relative.cgi> for relative (SLR) values; to be added to the Toronto eFP site). Data are shown for two transcription factors with cell-type specific expression. At3g24140 (FAMA; bHLH TF) and At5g65790 (ATMYB68; MYB TF) are mRNAs that are enriched in guard cells and root endodermis, respectively. Sucrose synthase 1 (*SUS1*, At5g20830) provides an example of an mRNA that is enriched in phloem companion cells under control conditions and hypoxia-induced across cell types. Views in eFP include three comparisons: shoot samples, shoot and whole root samples, or whole root and root tip samples as exemplified in the examples. Left panel, polysomal mRNA transcript abundance from MAS5 normalized raw data (referred to as “Absolute values”). Right panel, SLRs exposing cell-type enrichment by comparison to non-overlapping cell types in the same organ (values from Dataset S2, sheet *a*, referred to as “Relative values”).

**Fig. S4**

**mRNA abundance  
(MAS5 values)**

**mRNA enrichment in cell populations  
(SLR of RMA values)**

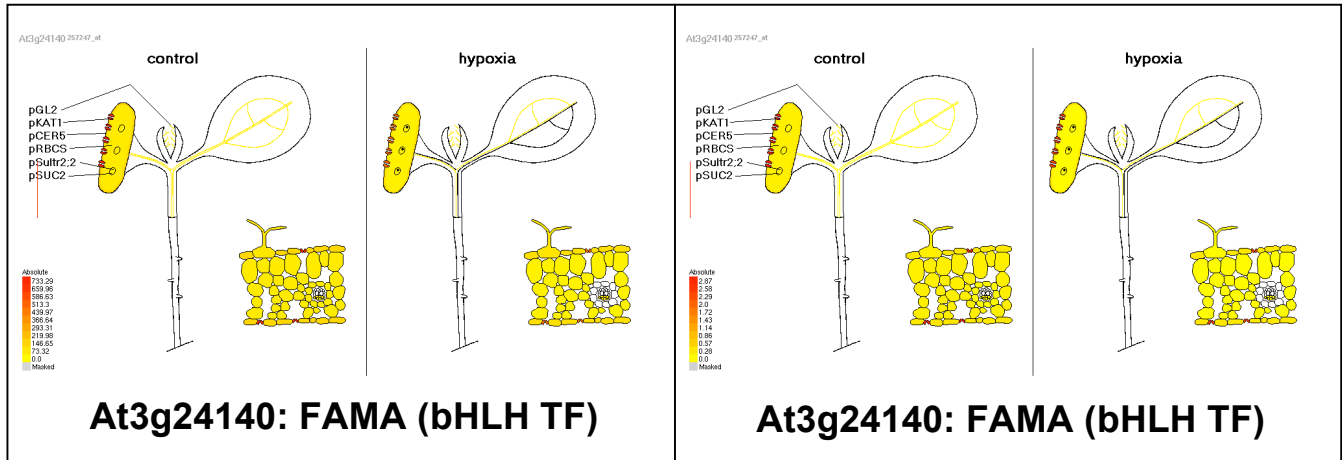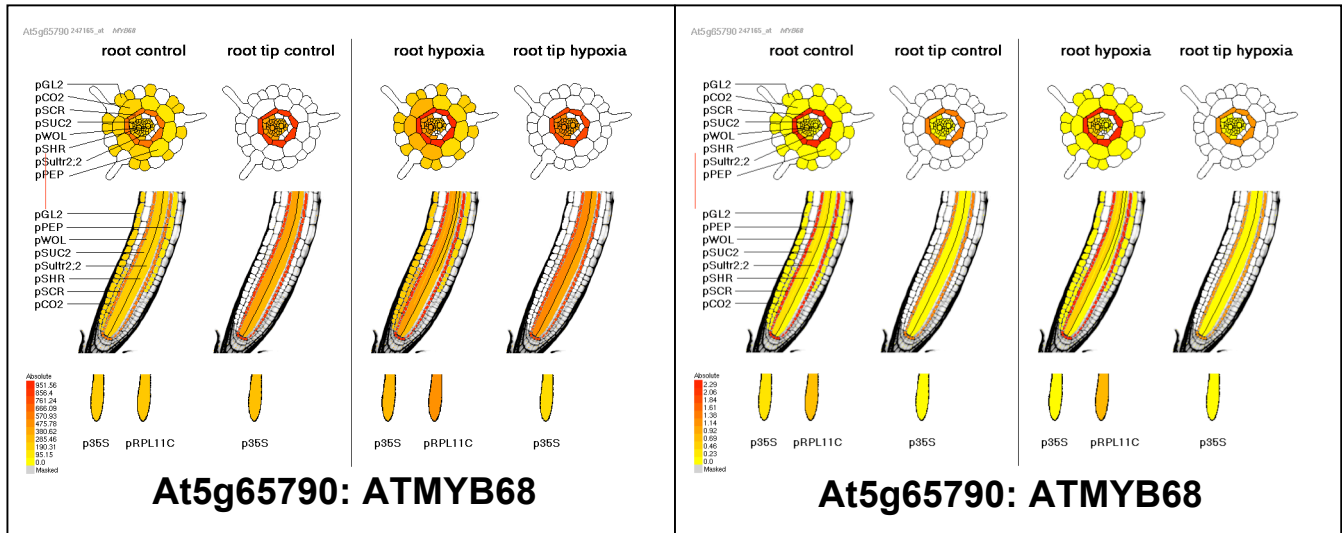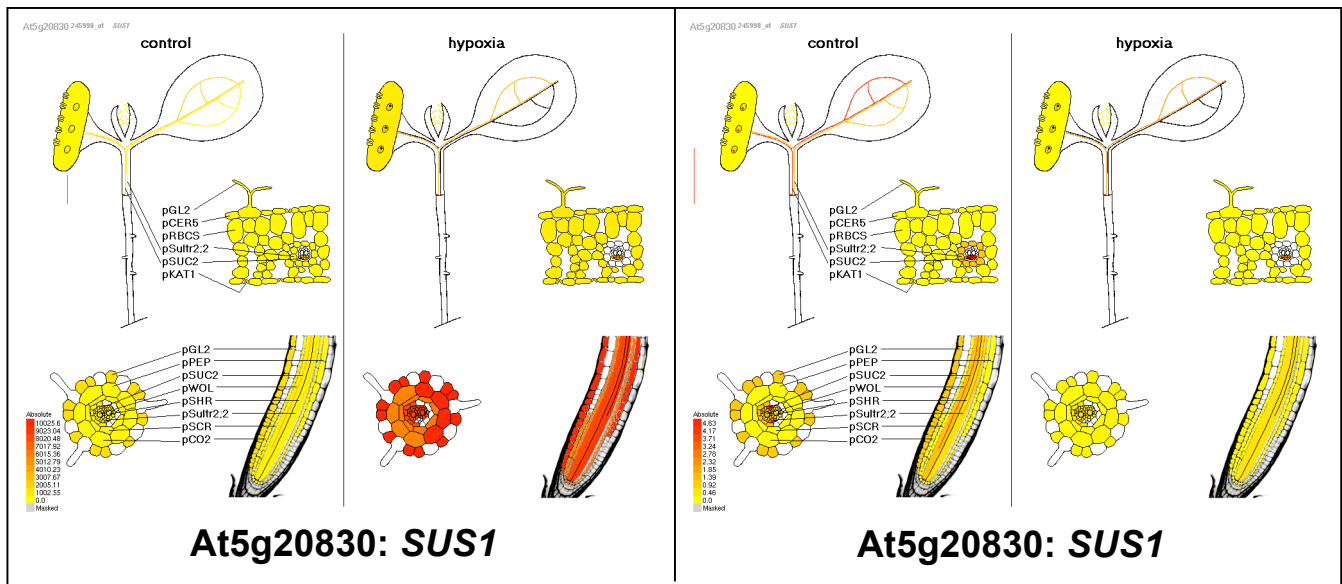

**Fig. S5.** Pattern of cell-type specific gene expression across all organs. (A) Means of RMA-normalized data of 11,273 genes (probe pair sets) from plants grown under control conditions were analyzed by fuzzy k-means clustering (Expanded Fig. 2). The median expression value of the 59 gene clusters was calculated from scaled values. The clusters were organized to visualize trends in cell-type mRNA enrichment. Each cluster includes a group of genes with similar enrichment/depletion across the samples. Sample names correspond to the promoters used for FLAG-RPL18 expression (Table 1). White bars divide different organs. Blue arrows indicate clusters presented in Fig. 2A. Red arrows indicate clusters presented in B. (B) Examples of clusters with strong cell-type enrichment from A. The colored panels show scaled RMA-values for all genes in a cluster; tables list the most significantly enriched Gene Ontology (GO) categories. GO enrichment P-values were calculated by the GOHyperGAll function (27). Dataset S3 contains all fuzzy k-means cluster and GO data.





# Fig. S5B

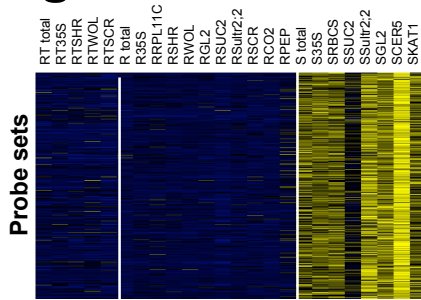

| <b>Cluster 4 (epidermis), 333 genes</b> | P(adj)   |
|-----------------------------------------|----------|
| BP: response to stimulus                | 2.62E-12 |
| CC: cell wall                           | 1.95E-05 |
| MF: transcription factor activity       | 4.01E-05 |

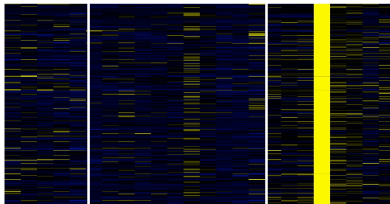

| <b>Cluster 6 (phloem CC shoot), 249 genes</b>      | P(adj)   |
|----------------------------------------------------|----------|
| MF: arsenate reductase (glutaredoxin) activity     | 2.92E-12 |
| MF: thiol-disulfide exchange intermediate activity | 3.75E-09 |
| MF: transcription factor activity                  | 2.50E-03 |

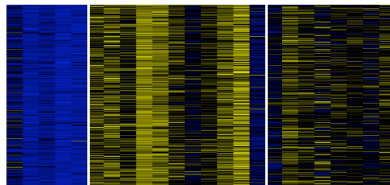

| <b>Cluster 12 (translation), 228 genes</b> | P(adj)    |
|--------------------------------------------|-----------|
| MF: structural constituent of ribosome     | 6.28E-130 |
| CC: ribonucleoprotein complex              | 4.30E-105 |
| BP: translation                            | 1.50E-75  |

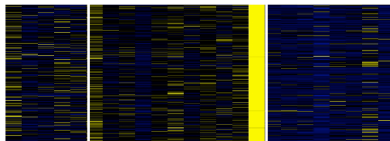

| <b>Cluster 15 (older cortex), 207 genes</b>          | P(adj)   |
|------------------------------------------------------|----------|
| MF: oxidoreductase activity, acting on paired donors | 1.83E-07 |
| BP: phenylpropanoid metabolic process                | 6.20E-07 |
| MF: transferase activity                             | 2.70E-06 |

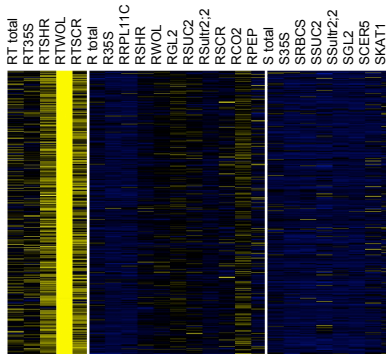

| <b>Cluster 18 (RT stele pWOL), 353 genes</b> | P(adj)   |
|----------------------------------------------|----------|
| MF: protein binding                          | 1.10E-06 |
| BP: protein amino acid phosphorylation       | 1.12E-04 |
| BP: defense response                         | 1.05E-03 |

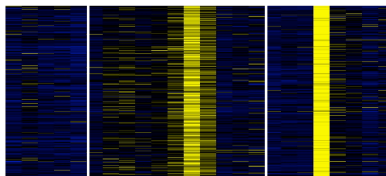

| <b>Cluster 22 (phloem CC), 213 genes</b>          | P(adj)   |
|---------------------------------------------------|----------|
| BP: ubiquitin-dependent protein catabolic process | 3.85E-04 |
| MF: actin binding                                 | 1.30E-03 |
| MF: alcohol transmembrane transporter activity    | 9.49E-03 |

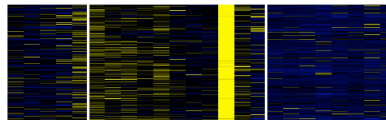

| <b>Cluster 25 (mature endodermis), 146 genes</b> | P(adj)   |
|--------------------------------------------------|----------|
| CC: intercellular junction                       | 3.39E-03 |
| CC: anchored to membrane                         | 3.55E-03 |
| BP: fatty acid biosynthetic process              | 5.30E-03 |
| MF: lipid binding                                | 6.14E-03 |

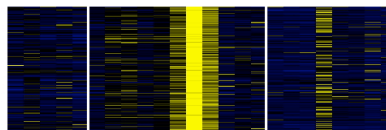

| <b>Cluster 30 (root phloem), 157 genes</b>             | P(adj)   |
|--------------------------------------------------------|----------|
| BP: hormone biosynthetic process                       | 1.18E-04 |
| MF: 1-aminocyclopropane-1-carboxylate oxidase activity | 9.68E-04 |
| MF: phospholipase C activity                           | 4.85E-03 |
| BP: response to chemical stimulus                      | 5.61E-03 |

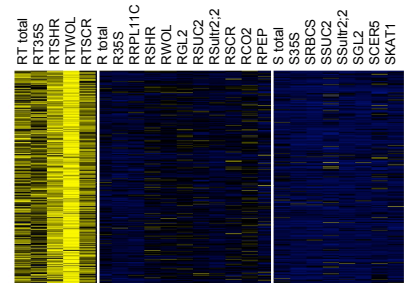

| <b>Cluster 41 (stele RT), 265 genes</b>                                   | P(adj)   |
|---------------------------------------------------------------------------|----------|
| MF: structural constituent of cell wall                                   | 1.12E-07 |
| MF: zinc ion binding                                                      | 2.29E-04 |
| BP: cellulose and pectin-containing cell wall organization and biogenesis | 7.43E-04 |

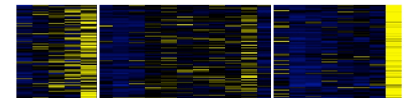

| <b>Cluster 50 (guard cells), 74 genes</b>     | P(adj)   |
|-----------------------------------------------|----------|
| MF: nucleoside-triphosphatase activity        | 9.24E-04 |
| BP: RNA interference, production of ta-siRNAs | 4.64E-03 |
| BP: proteolysis                               | 7.37E-03 |

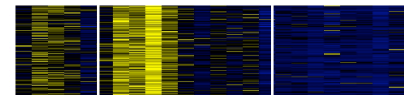

| <b>Cluster 53 (stele), 113 genes</b>                               | P(adj)   |
|--------------------------------------------------------------------|----------|
| BP: lipid transport                                                | 4.76E-07 |
| CC: anchored to membrane                                           | 1.25E-04 |
| BP: cellulose and pectin-containing secondary cell wall biogenesis | 4.24E-04 |
| MF: copper ion binding                                             | 2.93E-03 |

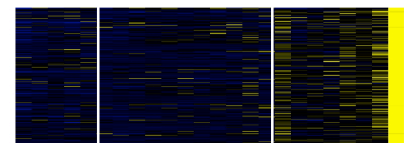

| <b>Cluster 54 (guard cells), 172 genes</b>         | P(adj)   |
|----------------------------------------------------|----------|
| MF: ATPase activity                                | 1.43E-03 |
| BP: virus induced gene silencing                   | 3.04E-03 |
| MF: 3-methyl-2-oxobutanoate dehydrogenase activity | 5.96E-03 |
| BP: stomatal movement                              | 2.15E-02 |

**Fig. S6.** GO enrichment in specific cell types (larger version of Fig. 2B). mRNAs enriched or depleted in the cell types tested were identified by a differential gene expression analysis between cell types of each organ/region. GO categories enriched or depleted in each mRNA population were identified. Blue: GO categories of enriched genes,  $-\log_{10}$  adjusted P-values; red: GO categories of depleted genes,  $+\log_{10}$  adjusted P-values. Grey: overlap of GO of enriched and depleted genes. Dataset S2 contains the corresponding expression and GO data. MS: *pSultr2;2* was treated as a plastid containing cell type (bundle sheath); ST: *pSultr2;2* was treated as vasculature cell type.

Fig. S6

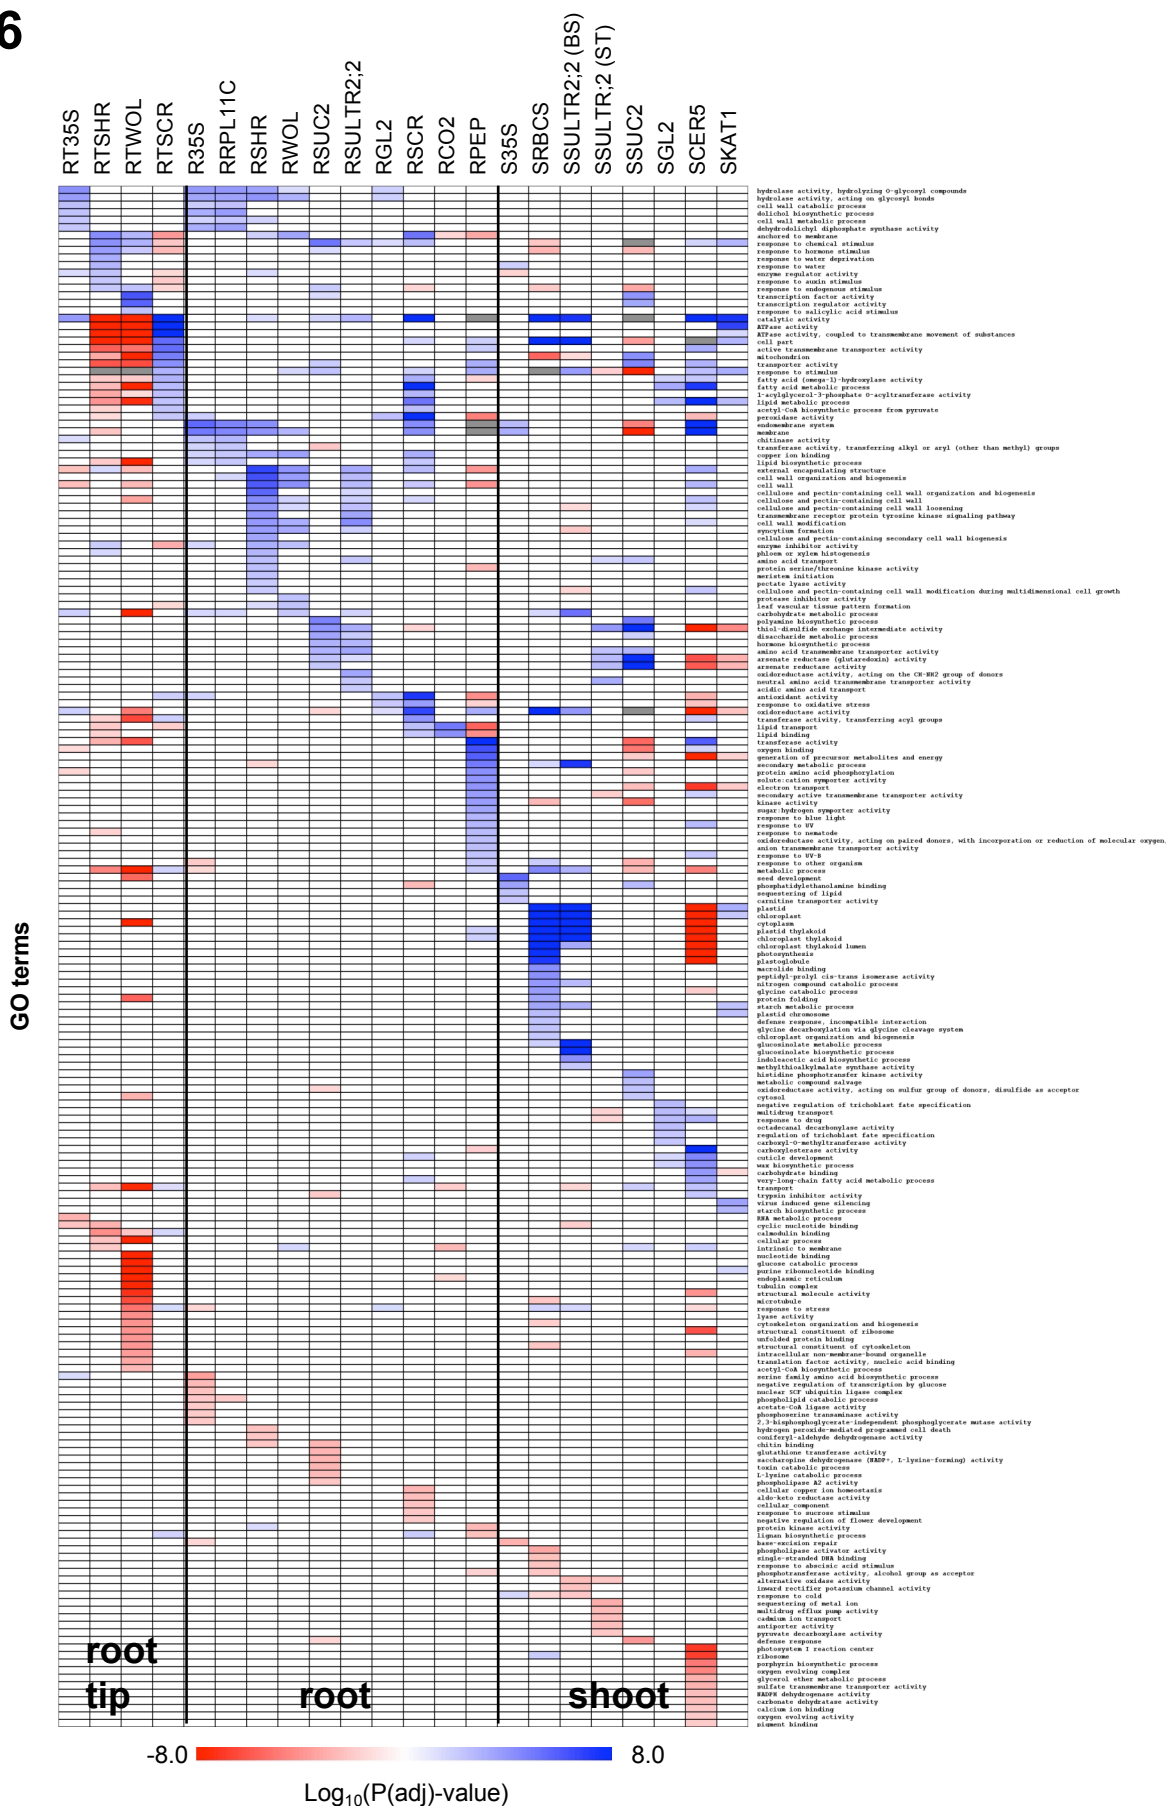

**Fig. S7.** Comparison of cell-specific enrichment of polysomal mRNAs with published data on cell-specific gene expression. (A) Overlap in cell-type specific mRNA populations obtained by immunopurification of mRNA-ribosome complexes or sorting of GFP-tagged cells. Comparison of enriched mRNAs identified from polysomal mRNA populations with those identified from total mRNA isolated from cells expressing GFP under the control of *pSUC2* (root phloem companion cells), *pPEP* (root elongating and mature cortex), *pSCR* (root epidermis) and *pWOL* (root stele). mRNAs that were significantly enriched in these cell types from Brady et al. (25) (reanalyzed in this study, see Dataset S4, sheet *a*; yellow) were compared to those identified in this study (Dataset S2, sheet *a*; grey). Venn diagrams represent the overlap in enriched mRNAs for the three promoters. GO enrichment was determined for each dataset (A: This study, Dataset S2; B: re-analyzed in this study, Dataset S4, sheet *b*). (B) Overlap in cell-type specific mRNA populations obtained by polysome immunopurification in shoots or isolation of cell types by other methods. Comparison of enriched mRNAs identified from polysomal mRNA populations with those identified from total mRNA isolated from stem epidermal peels (21), protoplasted guard cells (22), isolated trichomes (23), or isolated phloem companion cells of seedling root hypocotyls (24). mRNAs that were significantly enriched in these cell types (reanalyzed in this study from .CEL files, see Dataset S4, sheet *d*; yellow) were compared to those identified in this study (Dataset S2, sheet *a*; grey). Venn diagrams represent the overlap in enriched mRNAs for the two cell types. GO enrichment determined for each dataset (A: This study, Dataset S2; B: re-analyzed in this study, Dataset S4, sheet *e*).

**Fig. S7A**

**Root populations**

**pSUC2**

Brady et al. 2007

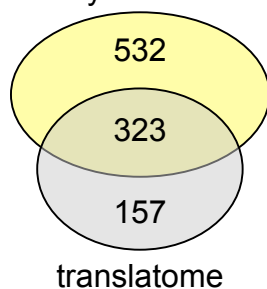

| GOID       | Term                                           | Ont | P(adj) (A) | (Padj) (B) |
|------------|------------------------------------------------|-----|------------|------------|
| GO:0042221 | response to chemical stimulus                  | BP  | 8.06E-06   | 3.97E-04   |
| GO:0006596 | polyamine biosynthetic process                 | BP  | 2.06E-05   | 1.82E-02   |
| GO:0030508 | thiol-disulfide exchange intermediate activity | MF  | 8.23E-05   | 9.13E-05   |
| GO:0005984 | disaccharide metabolic process                 | BP  | 3.30E-04   | 2.55E-02   |
| GO:0042446 | hormone biosynthetic process                   | BP  | 9.76E-04   | 1.48E-03   |
| GO:0015171 | amino acid transmembrane transporter activity  | MF  | 1.22E-03   | 2.78E-02   |
| GO:0008794 | arsenate reductase (glutaredoxin) activity     | MF  | 4.88E-03   | 4.19E-03   |
| GO:0030611 | arsenate reductase activity                    | MF  | 6.56E-03   | 3.18E-04   |
| GO:0005215 | transporter activity                           | MF  | 1.07E-02   | 1.61E-02   |
| GO:0003700 | transcription factor activity                  | MF  | 4.01E-02   | 4.74E-14   |
| GO:0005634 | nucleus                                        | CC  | 6.44E-02   | 4.97E-04   |

**pPEP**

Brady et al. 2007

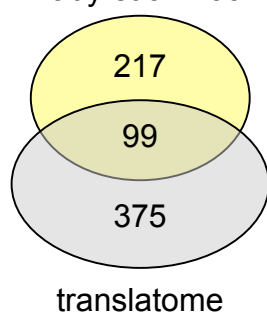

| GOID       | Term                                           | Ont | P(adj) (A) | (Padj) (B) |
|------------|------------------------------------------------|-----|------------|------------|
| GO:0003824 | catalytic activity                             | MF  | 2.51E-13   | 1.90E-13   |
| GO:0016020 | membrane                                       | CC  | 5.10E-12   | 1.75E-11   |
| GO:0019825 | oxygen binding                                 | MF  | 4.33E-07   | 4.05E-05   |
| GO:0006091 | generation of precursor metabolites and energy | BP  | 1.44E-06   | 8.70E-04   |
| GO:0019748 | secondary metabolic process                    | BP  | 1.22E-05   | 2.98E-03   |
| GO:0015294 | solute:cation symporter activity               | MF  | 9.35E-05   | 9.73E-07   |
| GO:0006118 | electron transport                             | BP  | 1.03E-04   | 1.99E-02   |
| GO:0005351 | sugar:hydrogen symporter activity              | MF  | 3.57E-04   | 4.78E-08   |
| GO:0005215 | transporter activity                           | MF  | 7.71E-04   | 9.87E-04   |
| GO:0009637 | response to blue light                         | BP  | 1.48E-03   | 1.64E-04   |
| GO:0009624 | response to nematode                           | BP  | 2.11E-03   | 1.20E-04   |
| GO:0010224 | response to UV-B                               | BP  | 4.73E-03   | 1.10E-02   |
| GO:0009416 | response to light stimulus                     | BP  | 1.13E-02   | 3.98E-07   |

**pSCR**

Brady et al. 2007

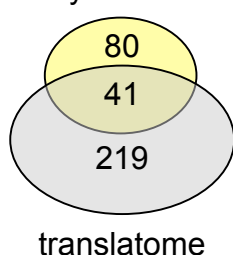

| GOID       | Term                          | Ont | P(adj) (A) | (Padj) (B) |
|------------|-------------------------------|-----|------------|------------|
| GO:0003824 | catalytic activity            | MF  | 2.12E-09   | 7.49E-04   |
| GO:0004601 | peroxidase activity           | MF  | 9.76E-09   | 6.68E-06   |
| GO:0012505 | endomembrane system           | CC  | 4.01E-05   | 1.22E-02   |
| GO:0006979 | response to oxidative stress  | BP  | 1.68E-04   | 5.48E-04   |
| GO:0042221 | response to chemical stimulus | BP  | 3.29E-03   | 4.82E-04   |

**pWOL**

Brady et al. 2007

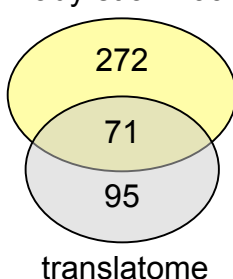

| GOID       | Term                                         | Ont | P(adj) (A) | P(adj) (B) |
|------------|----------------------------------------------|-----|------------|------------|
| GO:0005618 | cell wall                                    | CC  | 6.71E-05   | 7.58E-05   |
| GO:0030312 | external encapsulating structure             | CC  | 7.77E-05   | 1.79E-05   |
| GO:0005507 | copper ion binding                           | MF  | 2.30E-04   | 1.73E-06   |
| GO:0031225 | anchored to membrane                         | CC  | 4.32E-04   | 2.20E-06   |
| GO:0016798 | hydrolase activity, acting on glycosyl bonds | MF  | 1.30E-03   | 1.05E-03   |
| GO:0016020 | membrane                                     | CC  | 1.95E-03   | 6.19E-05   |
| GO:0010305 | leaf vascular tissue pattern formation       | BP  | 5.53E-03   | 5.64E-02   |
| GO:0009505 | cellulose and pectin-containing cell wall    | CC  | 1.92E-02   | 1.16E-02   |
| GO:0044262 | cellular carbohydrate metabolic process      | BP  | 7.93E-02   | 9.20E-04   |
| GO:0006869 | lipid transport                              | BP  | 9.42E-02   | 4.46E-04   |

# Shoot populatons

# Fig. S7B

## pCER5

Suh et al. 2005

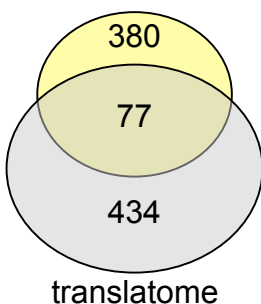

| GOID       | Term                                      | Ont | P(adj) (A) | P(adj) (B) |
|------------|-------------------------------------------|-----|------------|------------|
| GO:0016020 | membrane                                  | CC  | 2.86E-22   | 5.50E-10   |
| GO:0012505 | endomembrane system                       | CC  | 2.16E-14   | 1.18E-02   |
| GO:0016740 | transferase activity                      | MF  | 1.07E-06   | 9.58E-09   |
| GO:0042335 | cuticle development                       | BP  | 2.91E-05   | 1.26E-02   |
| GO:0010025 | wax biosynthetic process                  | BP  | 6.53E-05   | 1.90E-03   |
| GO:0030246 | carbohydrate binding                      | MF  | 1.50E-04   | 6.49E-05   |
| GO:0005618 | cell wall                                 | CC  | 1.97E-03   | 1.37E-06   |
| GO:0050896 | response to stimulus                      | BP  | 3.50E-03   | 2.09E-17   |
| GO:0009505 | cellulose and pectin-containing cell wall | CC  | 5.22E-03   | 1.27E-04   |
| GO:0042221 | response to chemical stimulus             | BP  | 2.39E-02   | 2.61E-07   |

## pKAT1

Yang et al. 2008

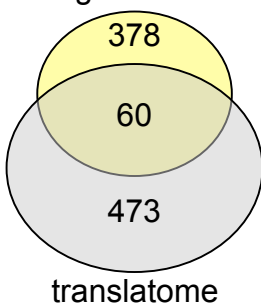

| GOID       | Term                    | Ont | P(adj) (A) | P(adj) (B) |
|------------|-------------------------|-----|------------|------------|
| GO:0016887 | ATPase activity         | MF  | 1.53E-07   | 9.00E-02   |
| GO:0006629 | lipid metabolic process | BP  | 2.70E-03   | 4.46E-02   |

## pGL2

Jacoby et al. 2008

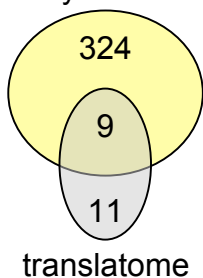

| GOID       | Term                                                  | Ont | P(adj) (A) | P(adj) (B) |
|------------|-------------------------------------------------------|-----|------------|------------|
| GO:0010062 | negative regulation of trichoblast fate specification | BP  | 2.12E-03   | 7.16E-01   |
| GO:0010061 | regulation of trichoblast fate specification          | BP  | 6.36E-03   | 2.62E-02   |

## pSUC2

Zhao et al. 2005

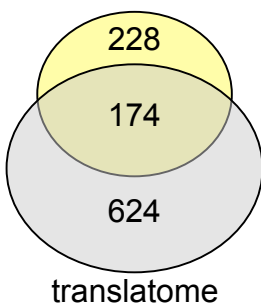

| GOID       | Term                                                                        | Ont | P(adj) (A) | P(adj) (B) |
|------------|-----------------------------------------------------------------------------|-----|------------|------------|
| GO:0030611 | arsenate reductase activity                                                 | MF  | 1.56E-12   | 3.14E-03   |
| GO:0030508 | thiol-disulfide exchange intermediate activity                              | MF  | 1.08E-11   | 1.47E-04   |
| GO:0008794 | arsenate reductase (glutaredoxin) activity                                  | MF  | 3.98E-11   | 2.33E-03   |
| GO:0003700 | transcription factor activity                                               | MF  | 1.06E-04   | 1.52E-02   |
| GO:0042221 | response to chemical stimulus                                               | BP  | 4.26E-03   | 1.04E-05   |
| GO:0006865 | amino acid transport                                                        | BP  | 5.93E-03   | 2.81E-03   |
| GO:0016765 | transferase activity, transferring alkyl or aryl (other than methyl) groups | MF  | 7.75E-02   | 2.13E-02   |
| GO:0050896 | response to stimulus                                                        | BP  | 9.64E-02   | 8.32E-06   |

Fig. S7C

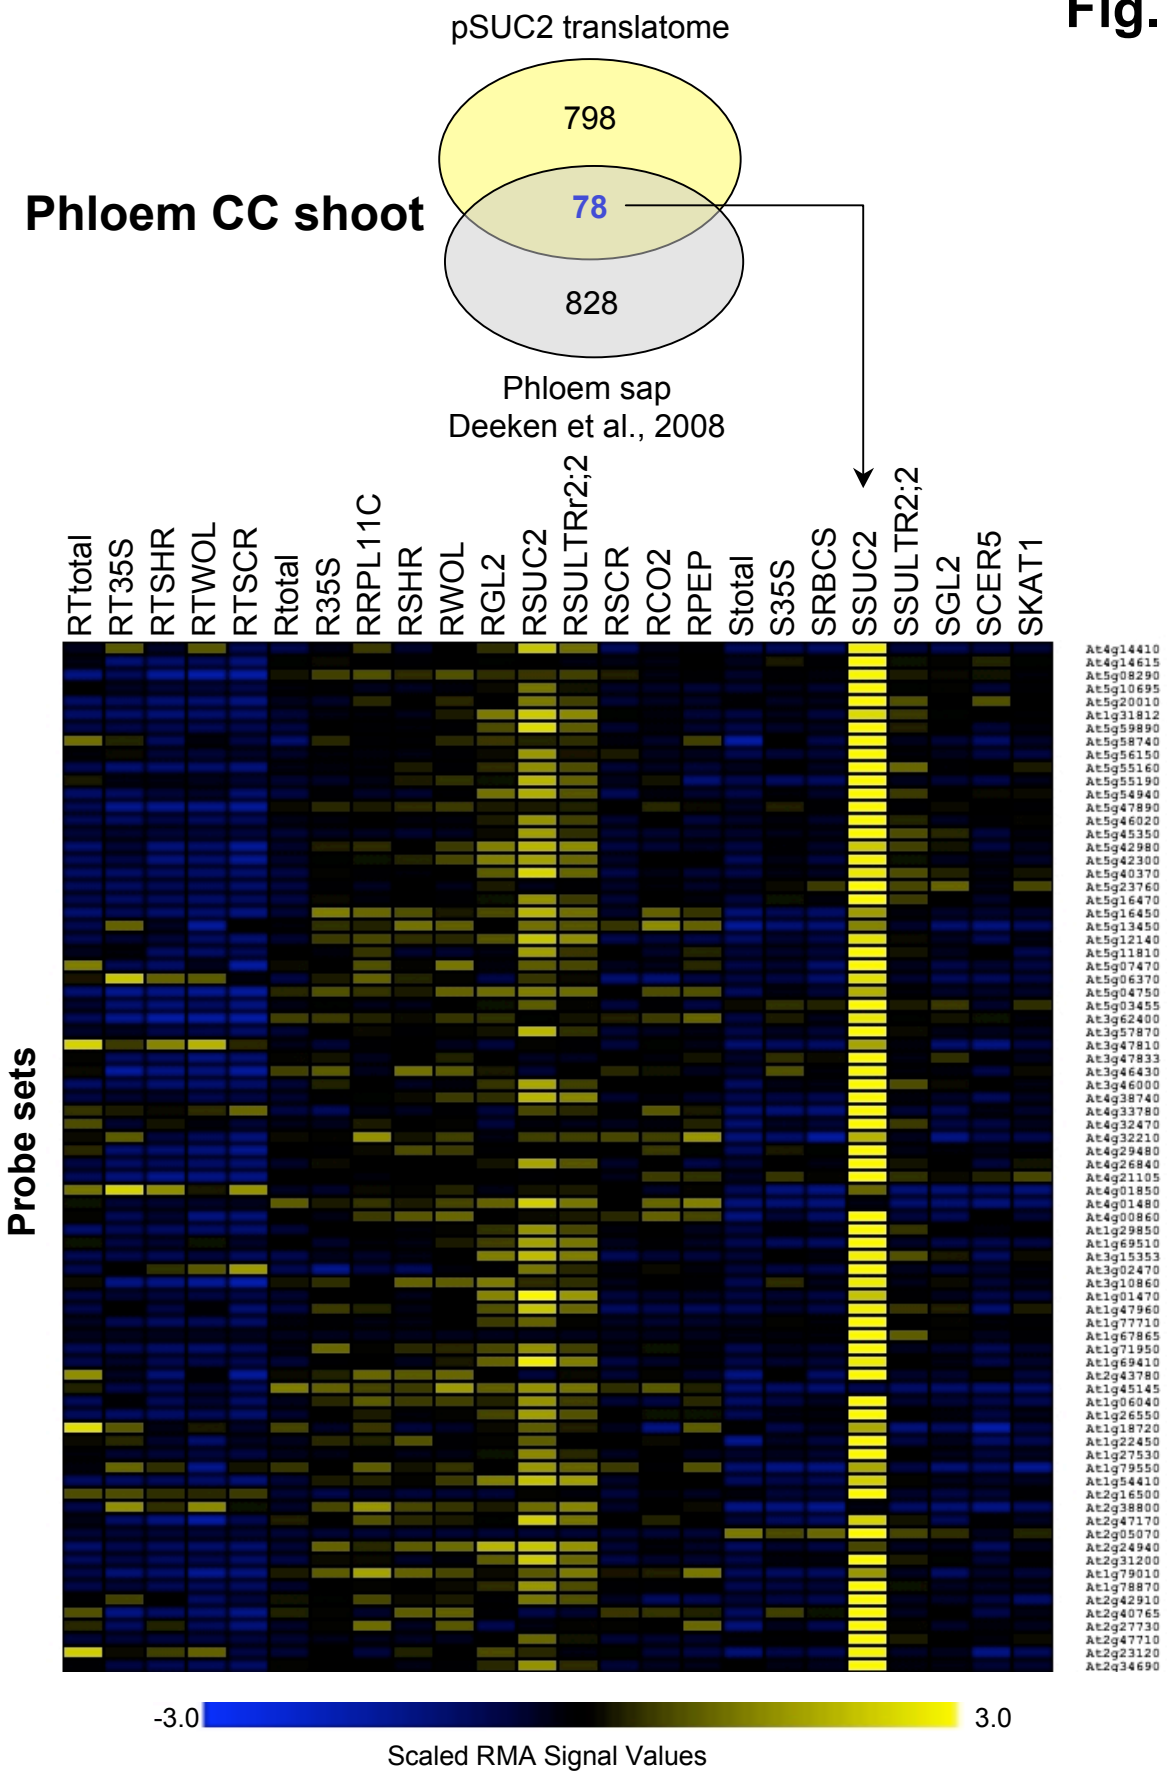

**Fig. S8.** mRNAs immunopurified with promoters that target the same cell types are partially overlapping. Overlap of significantly enriched gene lists in partially overlapping cell types (phloem companion cells, *pSUC2* and *pSultr2;2*; root cortex, *pCO2* and *pPEP*). Data are from Dataset S2, sheet *a*. The GO annotation enrichment was obtained for the overlapping phloem-companion cell specific gene lists of roots and shoots, and for the distinct cortex-specific gene lists.



**Fig. S8**

**Phloem CC root**

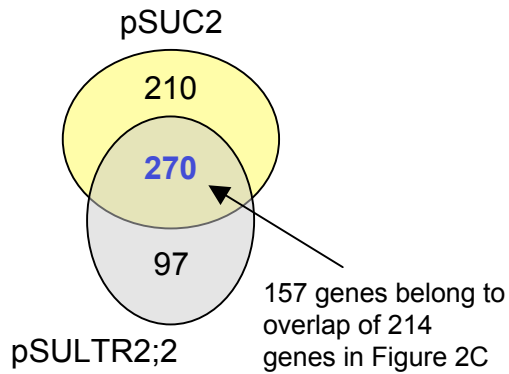

| GOID       | Term                                               | Ont | P(adj)   |
|------------|----------------------------------------------------|-----|----------|
| GO:0030508 | thiol-disulfide exchange intermediate activity     | MF  | 5.92E-05 |
| GO:0042446 | hormone biosynthetic process                       | BP  | 2.05E-04 |
| GO:0015171 | amino acid transmembrane transporter activity      | MF  | 1.82E-03 |
| GO:0035251 | UDP-glucosyltransferase activity                   | MF  | 6.12E-03 |
| GO:0009815 | 1-aminocyclopropane-1-carboxylate oxidase activity | MF  | 8.94E-03 |
| GO:0030422 | RNA interference, production of siRNA              | BP  | 1.04E-02 |
| GO:0008794 | arsenate reductase (glutaredoxin) activity         | MF  | 1.46E-02 |
| GO:0005985 | sucrose metabolic process                          | BP  | 1.89E-02 |
| GO:0010305 | leaf vascular tissue pattern formation             | BP  | 1.98E-02 |
| GO:0015804 | neutral amino acid transport                       | BP  | 3.28E-02 |
| GO:0004629 | phospholipase C activity                           | MF  | 4.37E-02 |

**Phloem CC shoot**

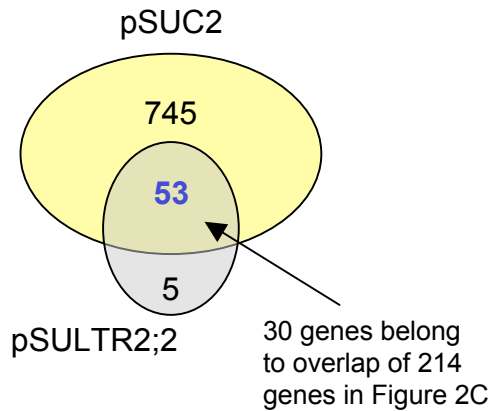

| GOID       | Term                                                  | Ont | P(adj)   |
|------------|-------------------------------------------------------|-----|----------|
| GO:0030508 | thiol-disulfide exchange intermediate activity        | MF  | 6.94E-05 |
| GO:0015175 | neutral amino acid transmembrane transporter activity | MF  | 4.53E-04 |
| GO:0008794 | arsenate reductase (glutaredoxin) activity            | MF  | 1.46E-03 |
| GO:0009915 | phloem loading                                        | BP  | 2.24E-02 |
| GO:0006537 | glutamate biosynthetic process                        | BP  | 2.99E-02 |
| GO:0030418 | nicotianamine biosynthetic process                    | BP  | 2.99E-02 |
| GO:0006021 | inositol biosynthetic process                         | BP  | 3.73E-02 |
| GO:0015804 | neutral amino acid transport                          | BP  | 3.73E-02 |

**Cortex root**

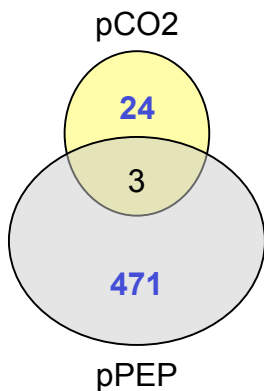

| GOID        | Term                                           | Ont | P(adj)   |
|-------------|------------------------------------------------|-----|----------|
| <b>pCO2</b> |                                                |     |          |
| GO:0006869  | lipid transport                                | BP  | 1.06E-05 |
| GO:0008289  | lipid binding                                  | MF  | 7.72E-05 |
| <b>pPEP</b> |                                                |     |          |
| GO:0003824  | catalytic activity                             | MF  | 2.51E-13 |
| GO:0016020  | membrane                                       | CC  | 5.10E-12 |
| GO:0019825  | oxygen binding                                 | MF  | 4.33E-07 |
| GO:0006091  | generation of precursor metabolites and energy | BP  | 1.44E-06 |
| GO:0019748  | secondary metabolic process                    | BP  | 1.22E-05 |
| GO:0006468  | protein amino acid phosphorylation             | BP  | 6.02E-05 |
| GO:0015294  | solute:cation symporter activity               | MF  | 9.35E-05 |
| GO:0009637  | response to blue light                         | BP  | 1.48E-03 |
| GO:0009624  | response to nematode                           | BP  | 2.11E-03 |
| GO:0010224  | response to UV-B                               | BP  | 4.73E-03 |

**Fig. S9.** GO enrichment in cell type mRNA populations after hypoxic treatment. After selection of hypoxia-modified genes by pairwise comparison of hypoxia versus control for each cell type (Dataset S5), the GO enrichment P-value of all GO terms was calculated by the GOHyperGAll function (27). Overlapping GO terms were removed by the simplify variant of the function. Data shown are  $\log_{10}$  of adjusted P-values. (A) Blue, GO enrichment of hypoxia-induced genes; (B) Red, GO enrichment of hypoxia-reduced genes.

**Fig. S9A**

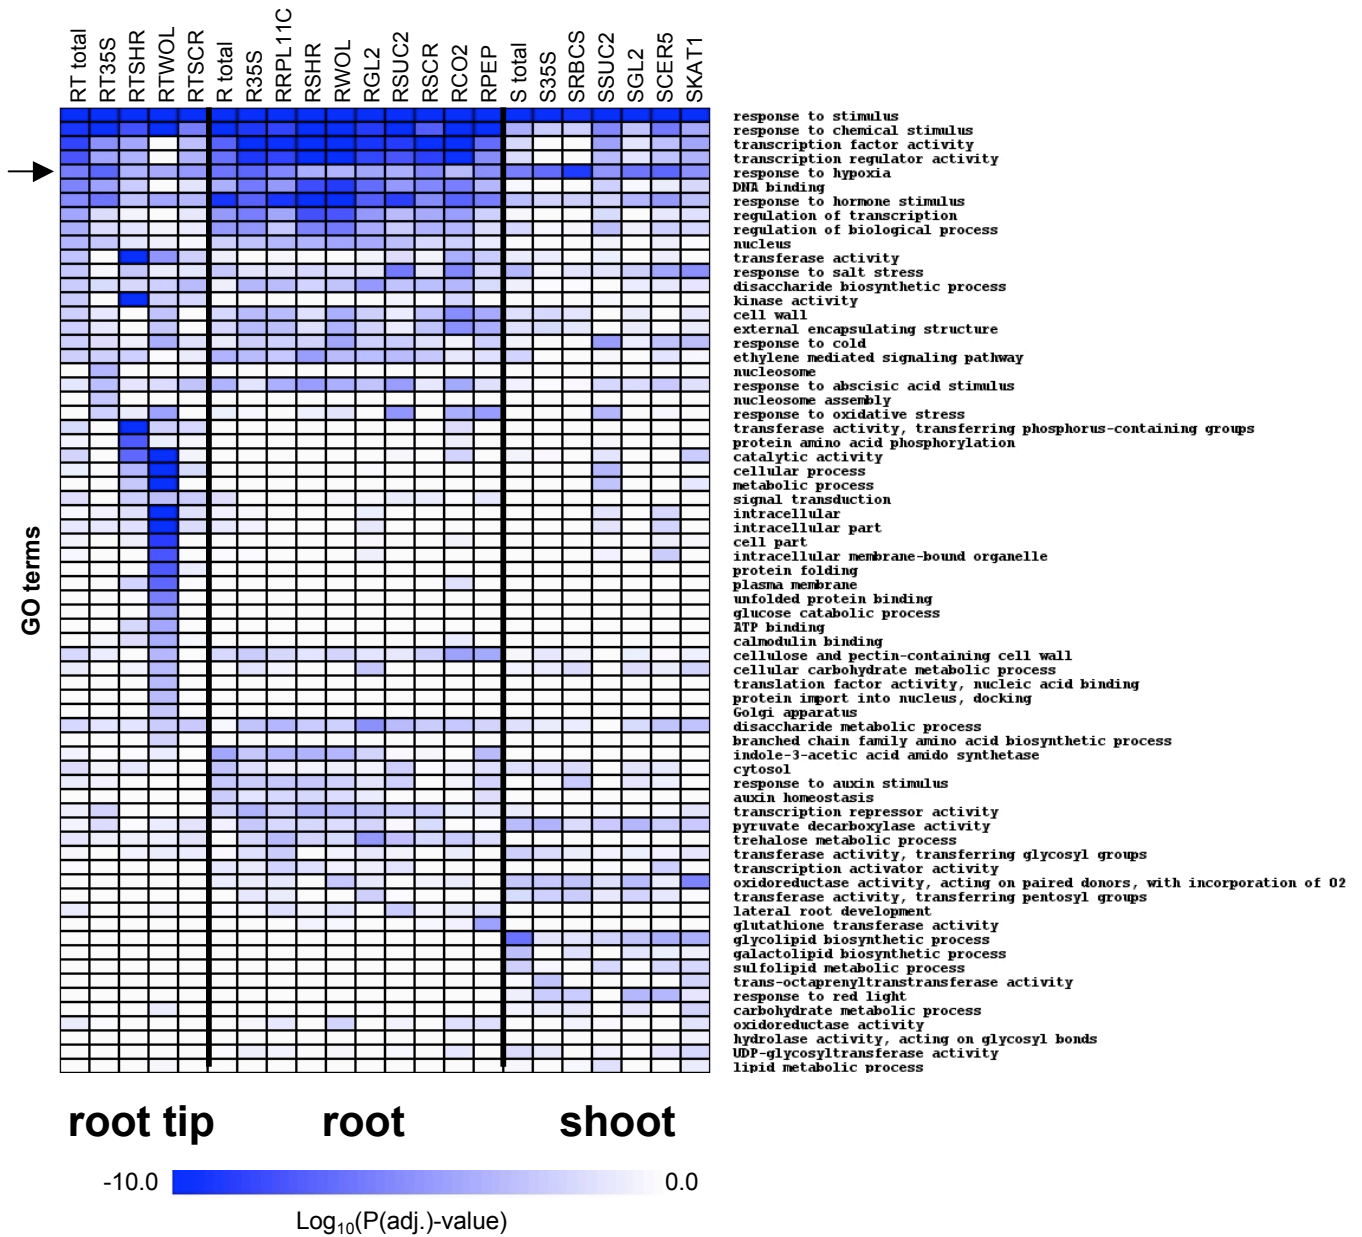

# Fig. S9B

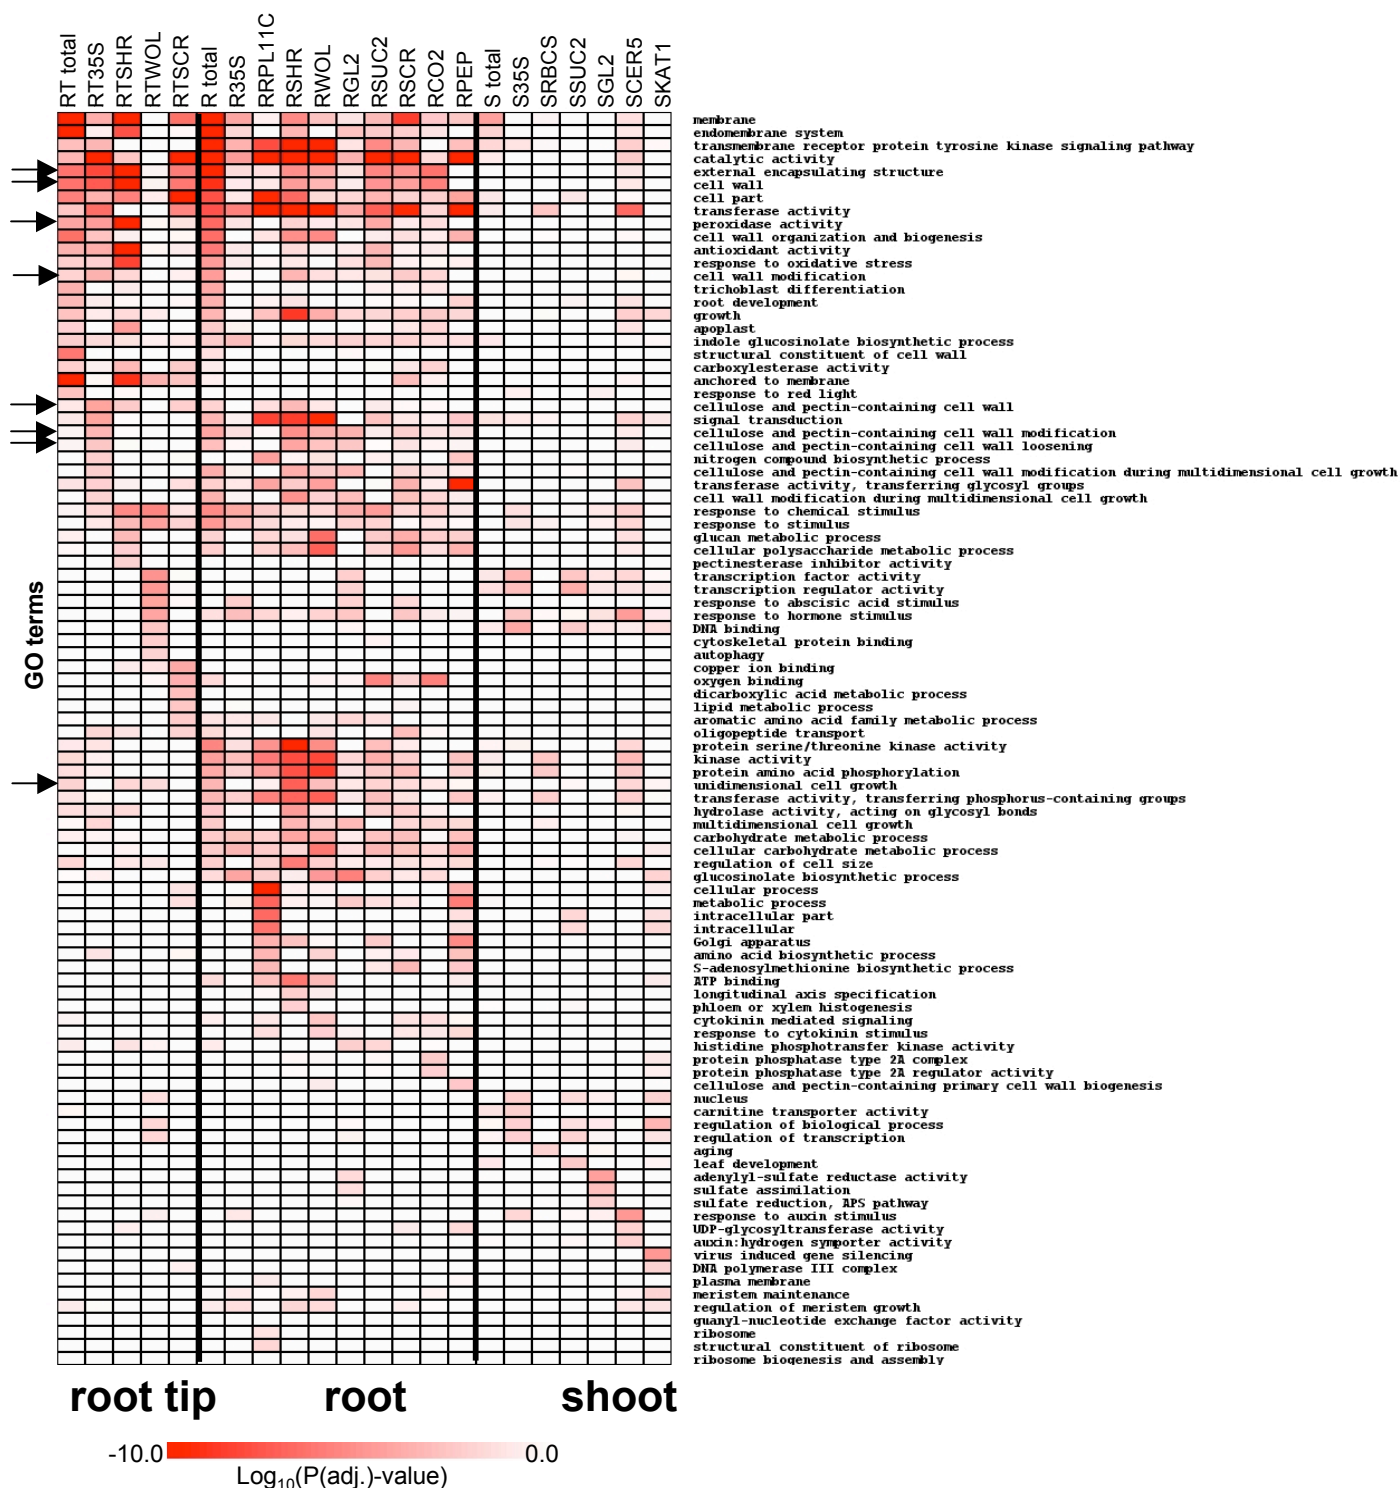

**Fig. S10.** Pattern of cell-type specific gene expression under hypoxia across all organs. (A) Means of RMA-normalized data of 6,461 genes (probe pair sets) of control and hypoxia samples were sorted by fuzzy k-means clustering, and the median of each cluster was calculated from scaled expression values. White bars divide different organs. The 100 clusters obtained from clustering of the data were then sorted to visualize trends in individual cell-types. Red arrows: clusters with reduced genes, presented in *B*; blue arrows: clusters with induced genes, presented in *C*. (*B* and *C*) Examples of different response clusters are shown, with scaled RMA-values for all genes in the clusters, and a table of the three most significant GO terms. Dataset S6 contains the cluster and GO data.

**Fig. S10A**

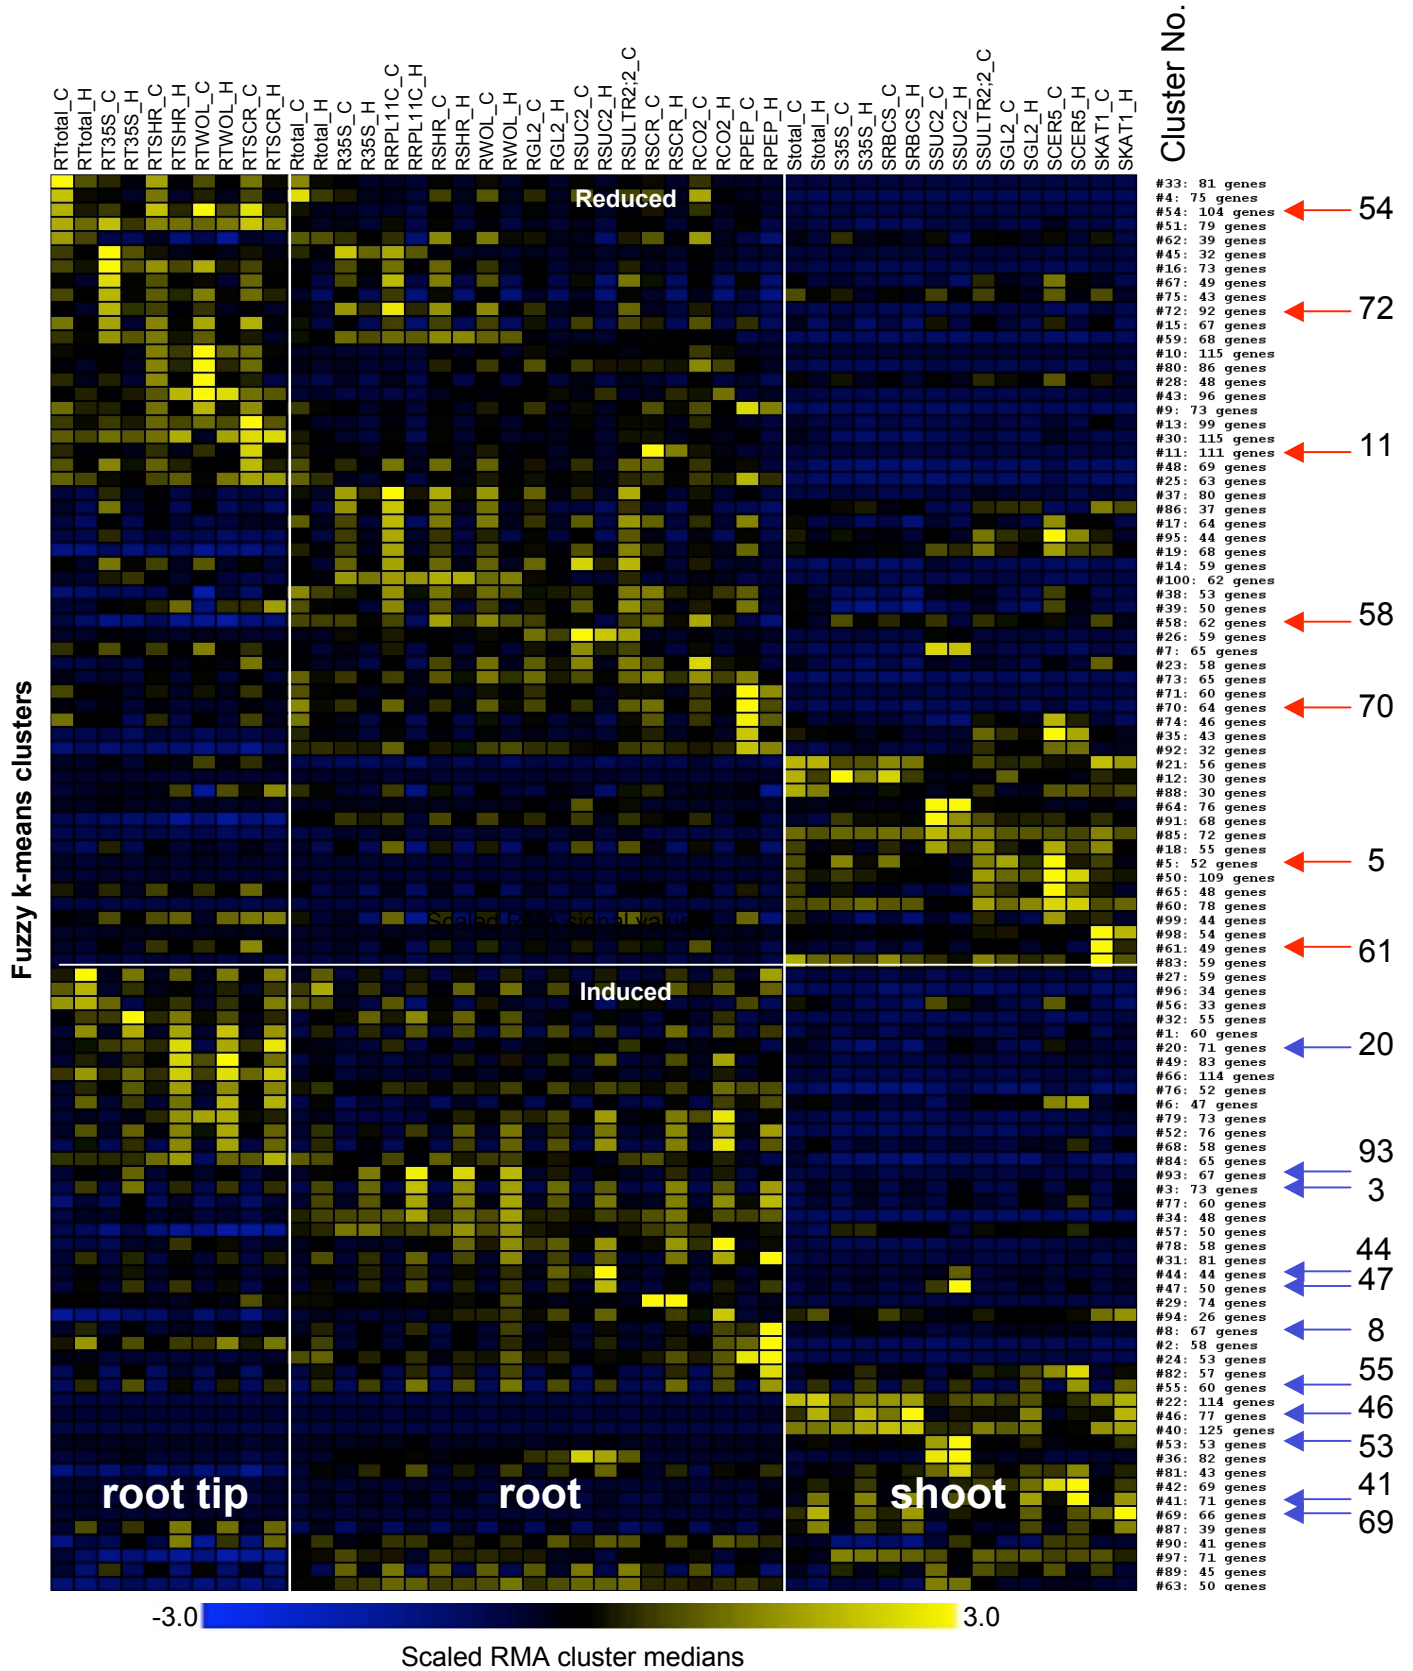

# Fig. S10B - reduced genes

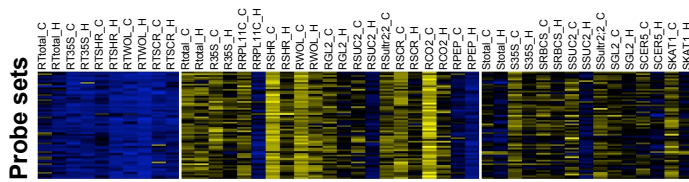

|                                                  |          |
|--------------------------------------------------|----------|
| <b>Cluster 58, 62 genes (ribosomal proteins)</b> | P(adj)   |
| MF: structural constituent of ribosome           | 1.04E-51 |
| CC: ribosome                                     | 4.98E-47 |
| BP: translation                                  | 9.48E-29 |

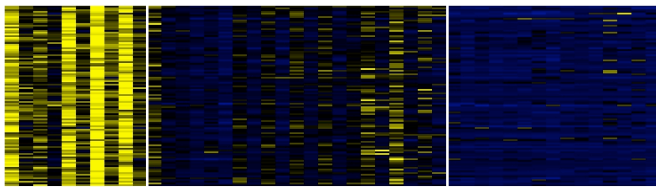

|                                                                           |          |
|---------------------------------------------------------------------------|----------|
| <b>Cluster 54, 104 genes (reduction in root tip)</b>                      | P(adj)   |
| MF: structural constituent of cell wall                                   | 1.49E-07 |
| BP: cellulose and pectin-containing cell wall organization and biogenesis | 8.63E-04 |
| BP: trichoblast differentiation                                           | 1.58E-03 |

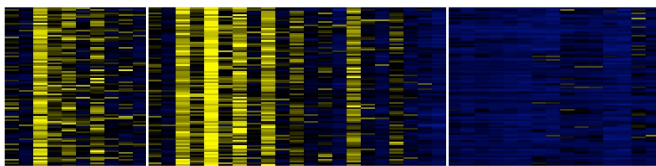

|                                                                 |          |
|-----------------------------------------------------------------|----------|
| <b>Cluster 72, 92 genes (reduction of stele-enriched genes)</b> | P(adj)   |
| BP: glucosinolate biosynthetic process                          | 3.61E-06 |
| BP: tryptophan catabolic process                                | 1.68E-04 |
| BP: auxin biosynthetic process                                  | 4.82E-04 |

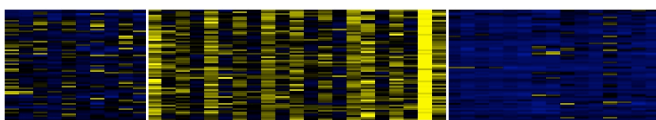

|                                                                  |          |
|------------------------------------------------------------------|----------|
| <b>Cluster 70, 64 genes (reduction of cortex-enriched genes)</b> | P(adj)   |
| MF: transferase activity, transferring glycosyl groups           | 6.33E-03 |
| BP: chalcone biosynthetic process                                | 2.65E-02 |
| BP: response to boron                                            | 2.65E-02 |

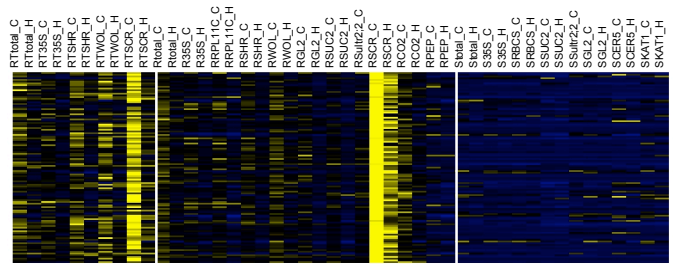

|                                                                       |          |
|-----------------------------------------------------------------------|----------|
| <b>Cluster 11, 111 genes (reduction of endodermis-enriched genes)</b> | P(adj)   |
| MF: catalytic activity                                                | 8.98E-08 |
| BP: monocarboxylic acid metabolic process                             | 1.75E-06 |
| MF: copper ion binding                                                | 2.73E-03 |

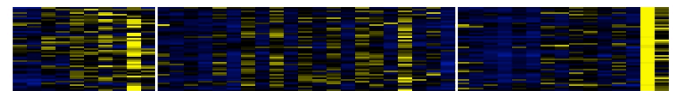

|                                                                      |          |
|----------------------------------------------------------------------|----------|
| <b>Cluster 61, 49 genes (reduction of guard cell-enriched genes)</b> | P(adj)   |
| CC: DNA polymerase III complex                                       | 2.41E-04 |
| CC: protein phosphatase type 2A complex                              | 2.51E-03 |
| MF: protein phosphatase type 2A regulator activity                   | 2.68E-03 |

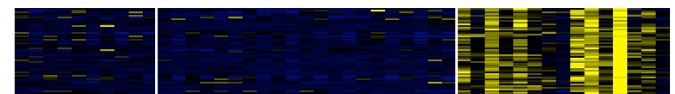

|                                                                    |          |
|--------------------------------------------------------------------|----------|
| <b>Cluster 5, 52 genes (reduction of epidermis-enriched genes)</b> | P(adj)   |
| BP: response to auxin stimulus                                     | 3.31E-07 |
| MF: glucuronosyltransferase activity                               | 1.24E-03 |
| CC: lateral plasma membrane                                        | 6.85E-03 |

# Fig. S10C - induced genes

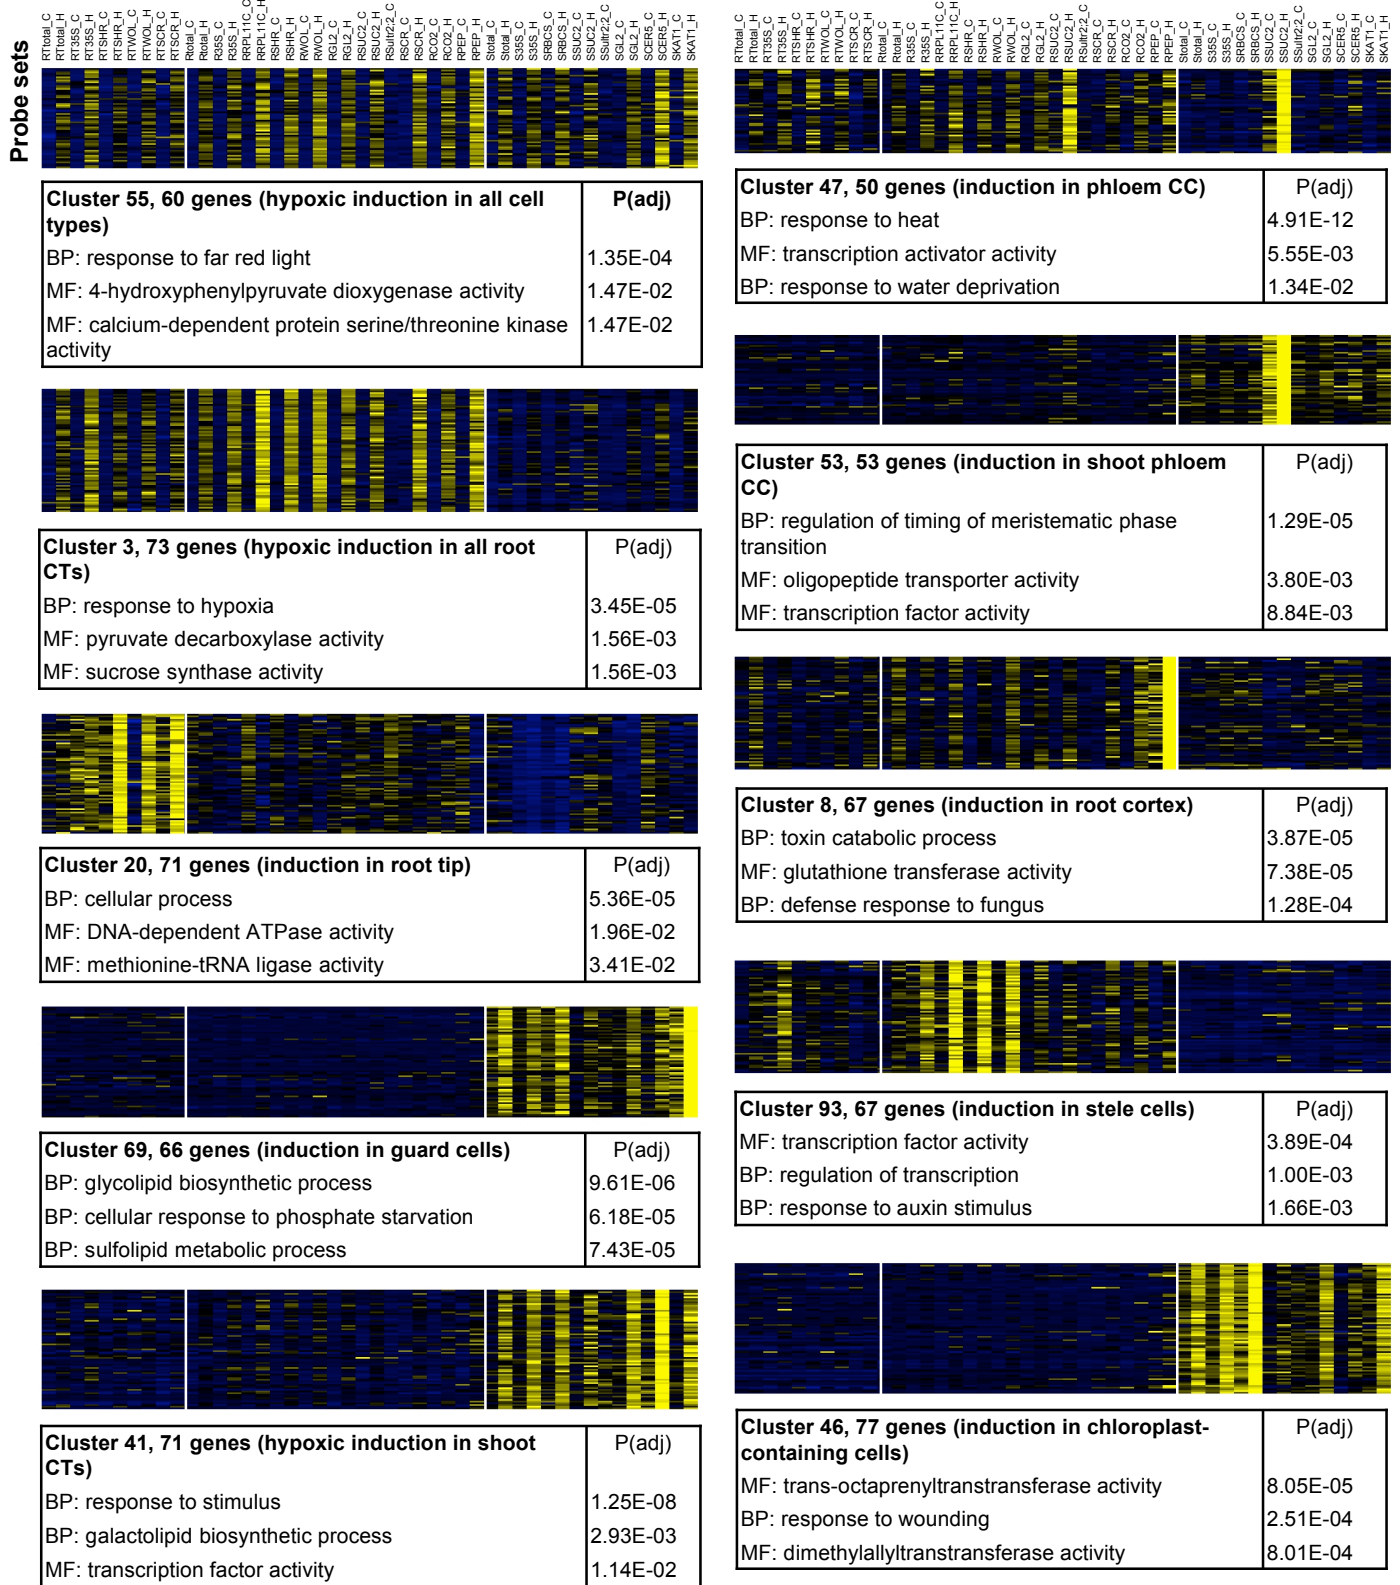



**Fig. S11.** Heat shock protein (HSP) and heat shock factor (HSF) mRNA adjustments in polysomal mRNA cell type populations after hypoxic treatment. The SLR of pairwise comparisons of hypoxia versus control for each cell type is shown for all genes associated with the heat shock response (names according to ref. 41). Data are signal-log-ratios between H and C from Dataset S5. Arrows indicate the phloem CC samples (*pSUC2*) that show the highest and most complex induction of HSP mRNAs in the polysomal population.

Fig. S11

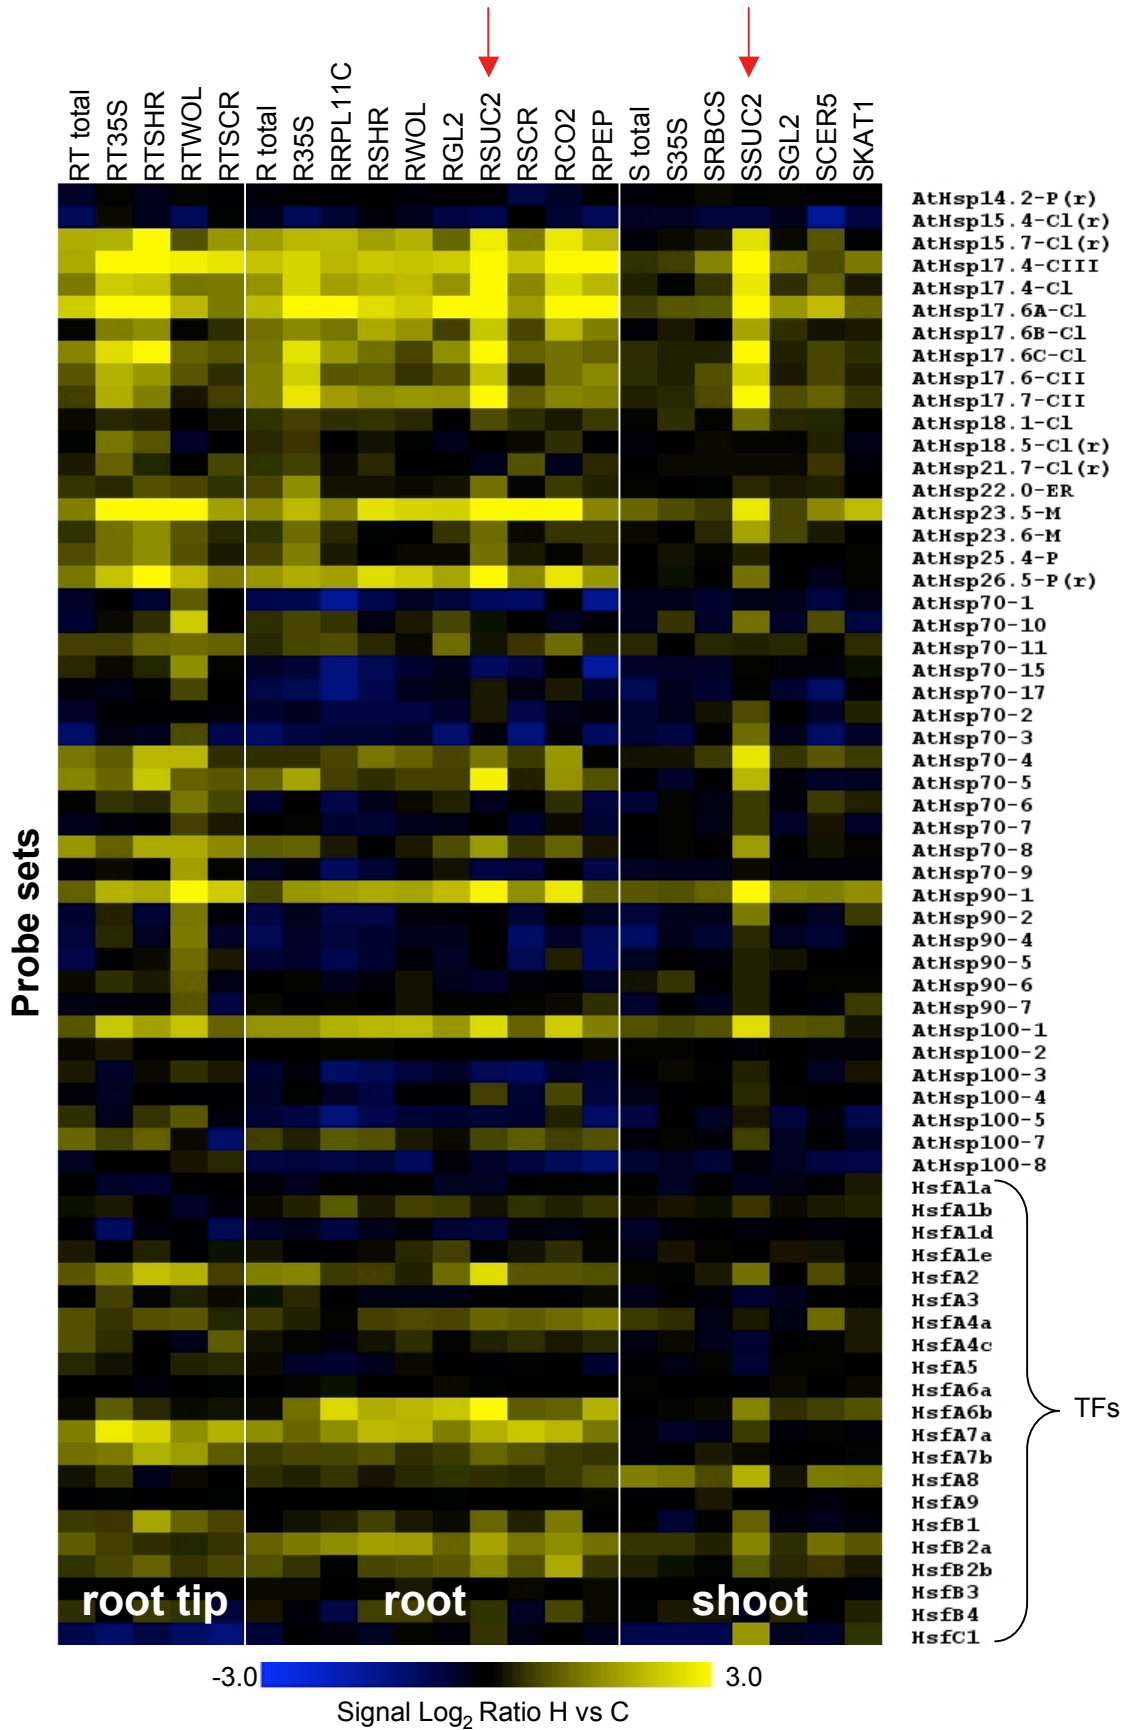

**Fig. S12.** Cell-type specific gene expression data are valuable to characterize gene families.

(A) Transcription factor (TF) family member genes are differentially expressed in cell types. All TF families are shown with SLRs generated in the differential gene expression analysis of control samples for all cell types and organs (Dataset S2, sheet *a*). Values were ordered by hierarchical clustering in MEV. MS: *pSultr2;2* was treated as a plastid containing cell type (bundle sheath); ST: *pSultr2;2* was treated as vasculature cell type. (B) Focus on three TF families, extracted from A. (C and D) TF family enrichment in specific cell types confirmed by GO analysis. Differentially expressed genes (Dataset S2, sheet *a*) were evaluated for TF families. (C) TF family enrichment (TF family gene lists were obtained from TAIR and AGRIS) among the cell-type enriched genes, analyzed for significant enrichment by the GOHyperGAll function (27). Data shown are  $\log_{10}$  of adjusted P-values. (D) Enrichment of binding sites for transcription factors in the -1000 bp promoter region of cell-type enriched genes (analyzed by Athena, [http://www.bioinformatics2.wsu.edu/cgi-bin/Athena/cgi/analysis\\_select.pl](http://www.bioinformatics2.wsu.edu/cgi-bin/Athena/cgi/analysis_select.pl)). Data are  $\log_{10}$  of adjusted P-values.

**Fig. S12A**

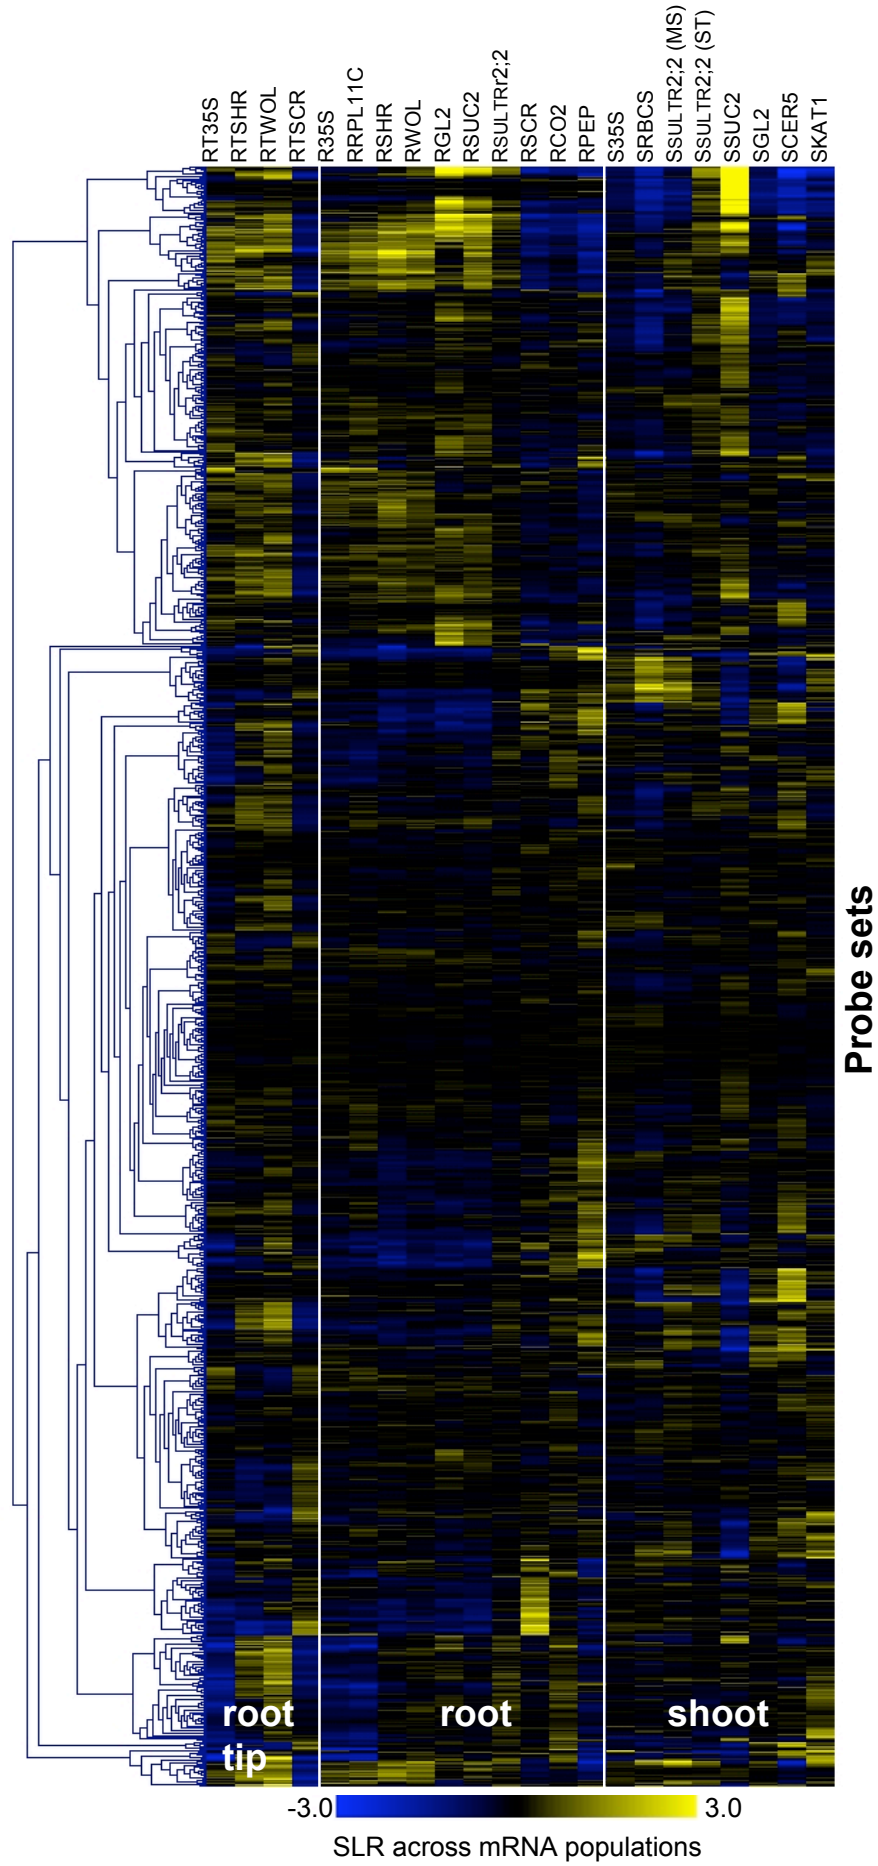

**Fig. S12B**

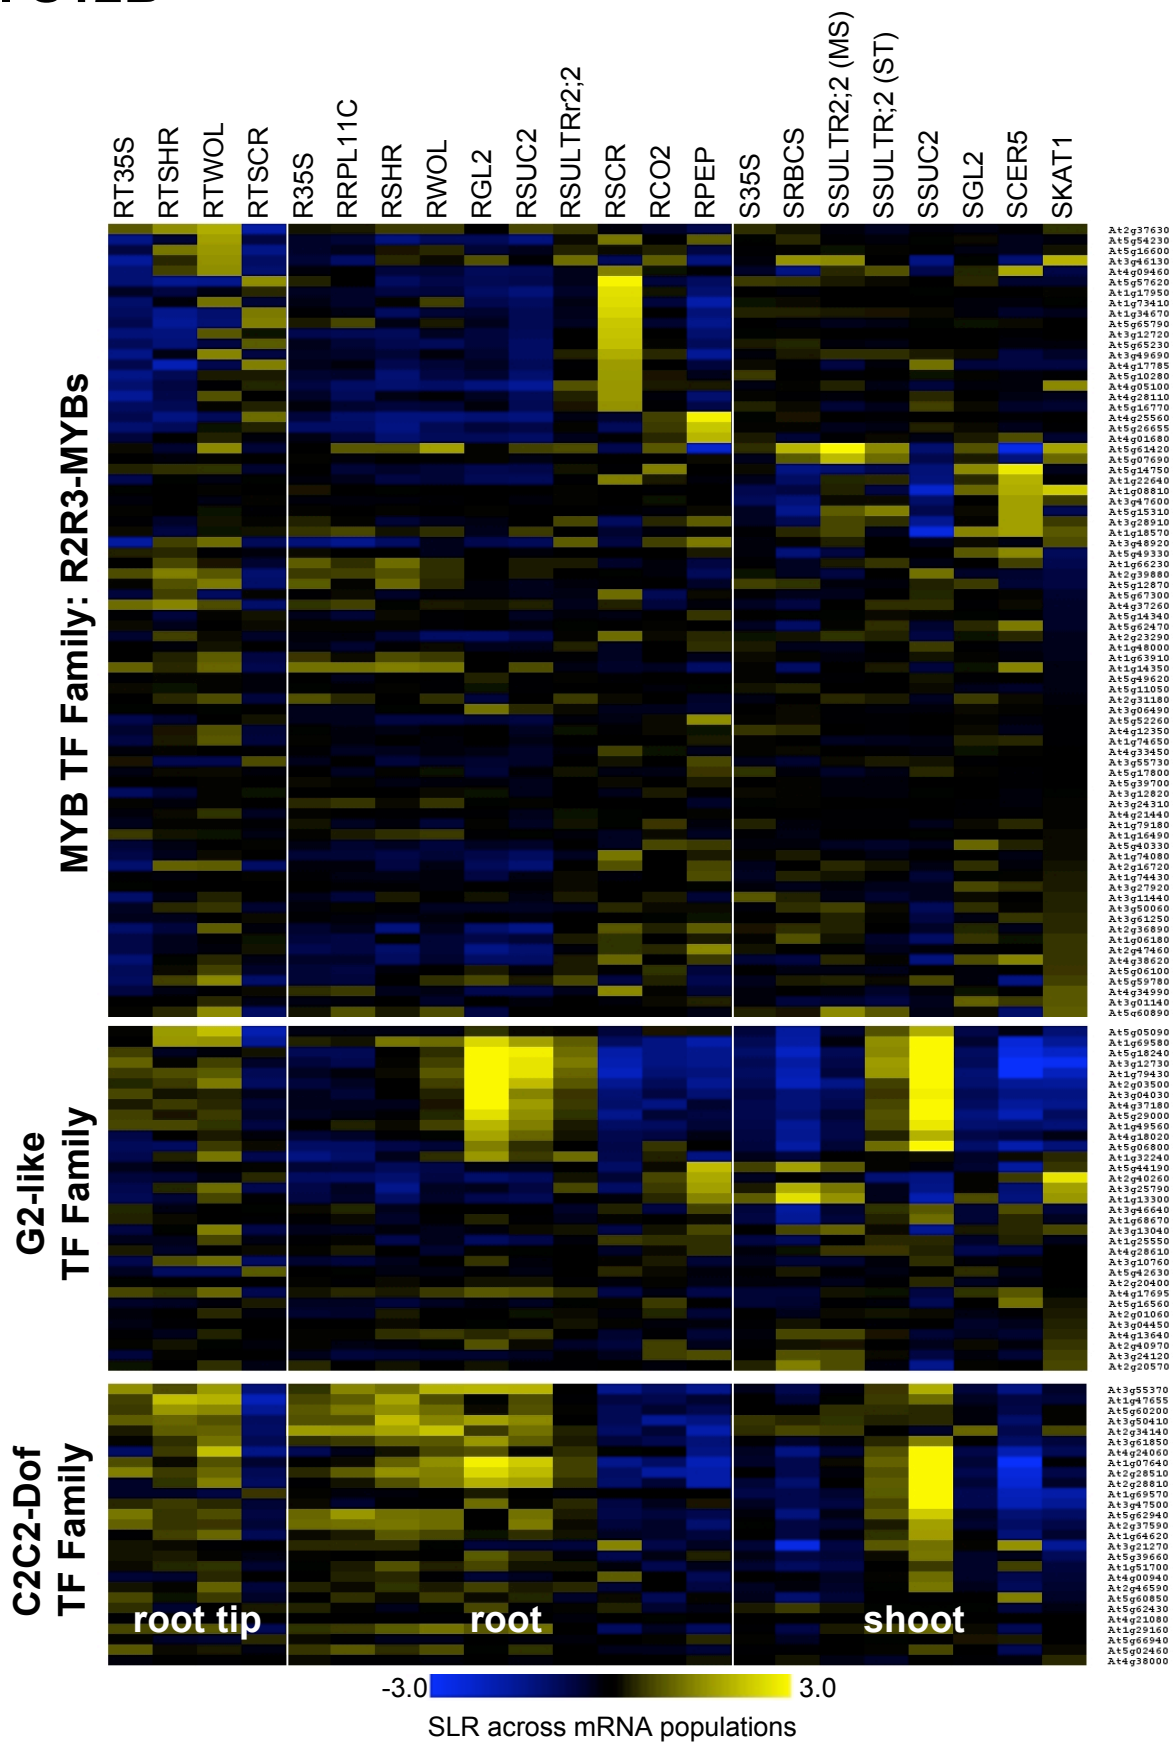

# Fig. S12C and D

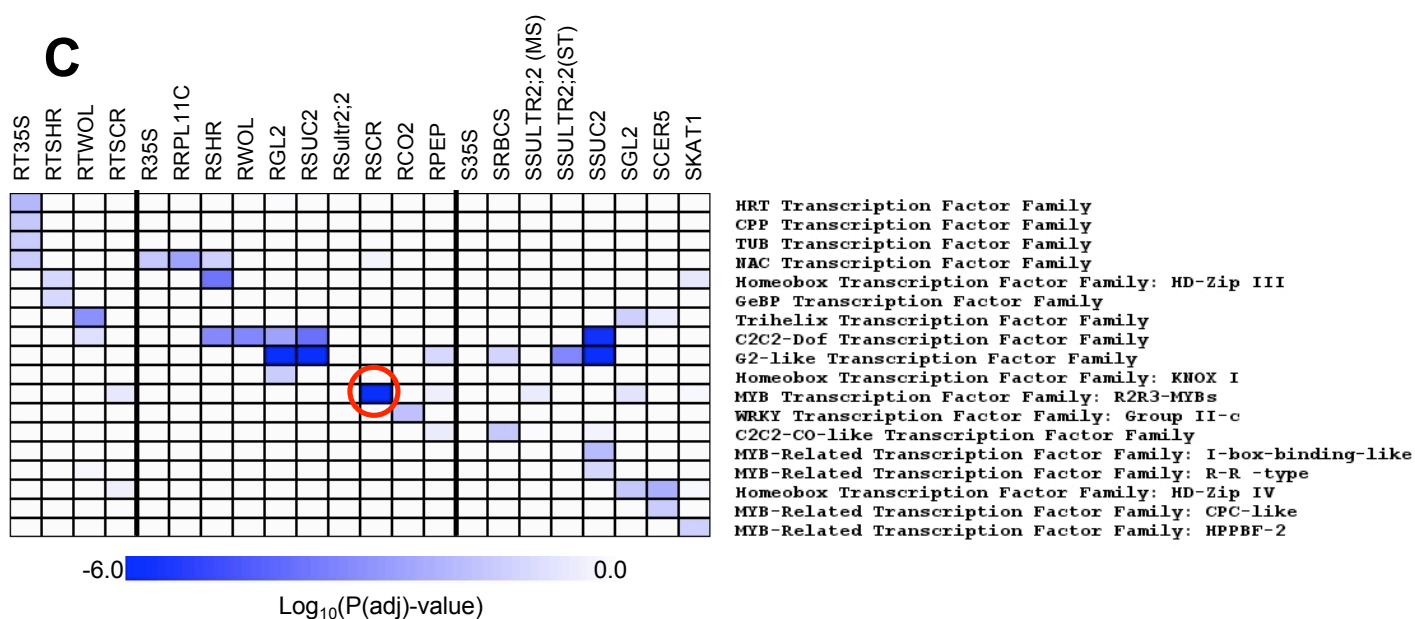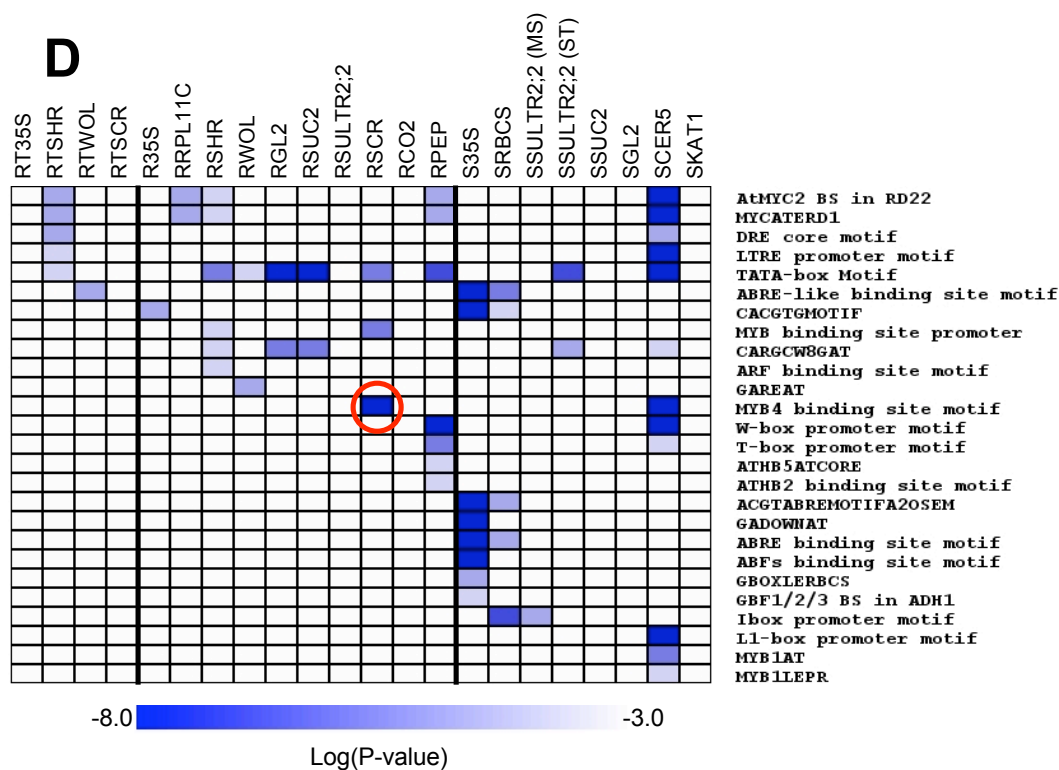

**Fig. S13.** Changes in expression of transcription factors during hypoxic stress. (A) Some transcription factor families are differentially expressed in response to hypoxia. All TF families are shown with SLRs of the comparison hypoxia versus control for all cell types and organs. Values were ordered by hierarchical clustering in MEV. Data values are from Dataset S5. (B) Two examples for TF families, extracted from A. Names of ERF TFs according to Nakano et al. (42). (C and D) TF family enrichment in cell type mRNA populations after hypoxic treatment. Hypoxia-induced genes in each cell type (Dataset S5) were evaluated for TF families. (C) TF family enrichment (TF family gene lists were obtained from TAIR and AGRIS) among the hypoxia-induced genes, analyzed for significant enrichment by the GOHyperGAll function (27). Data shown are log<sub>10</sub> of adjusted P-values. (D) Enrichment of binding sites for transcription factors in -1000 bp promoter region of hypoxia-induced genes (analyzed by Athena). Data are log<sub>10</sub> of adjusted P-values.

Fig. S13A

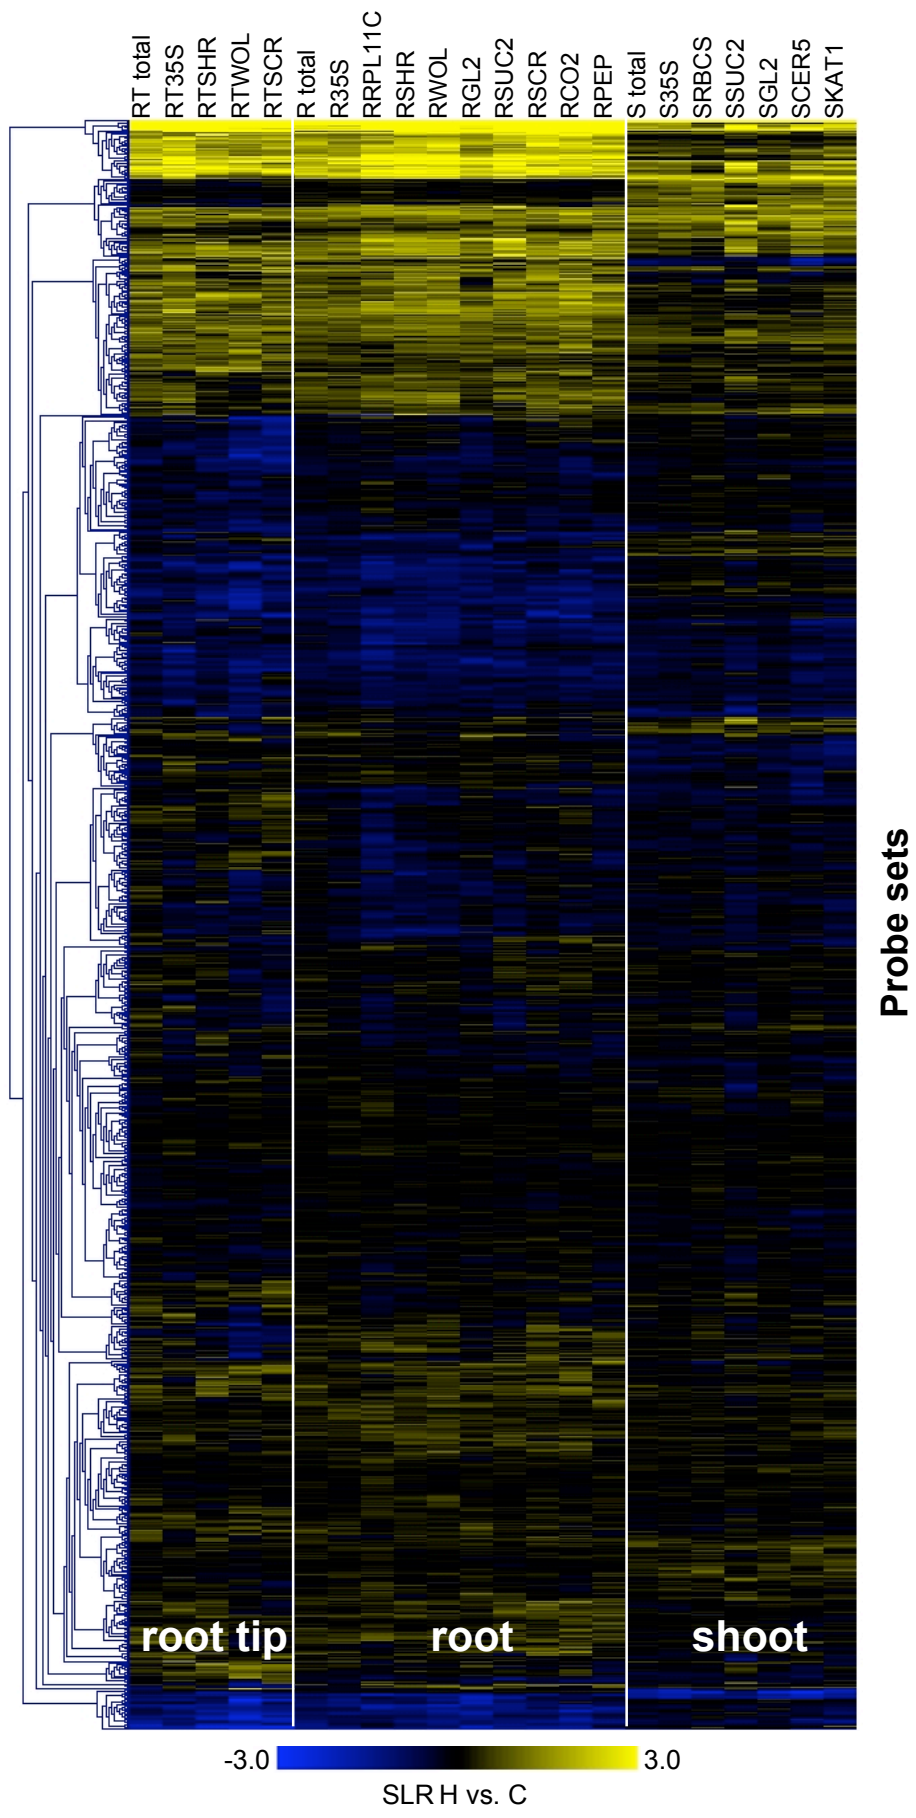



**Fig. S13B**

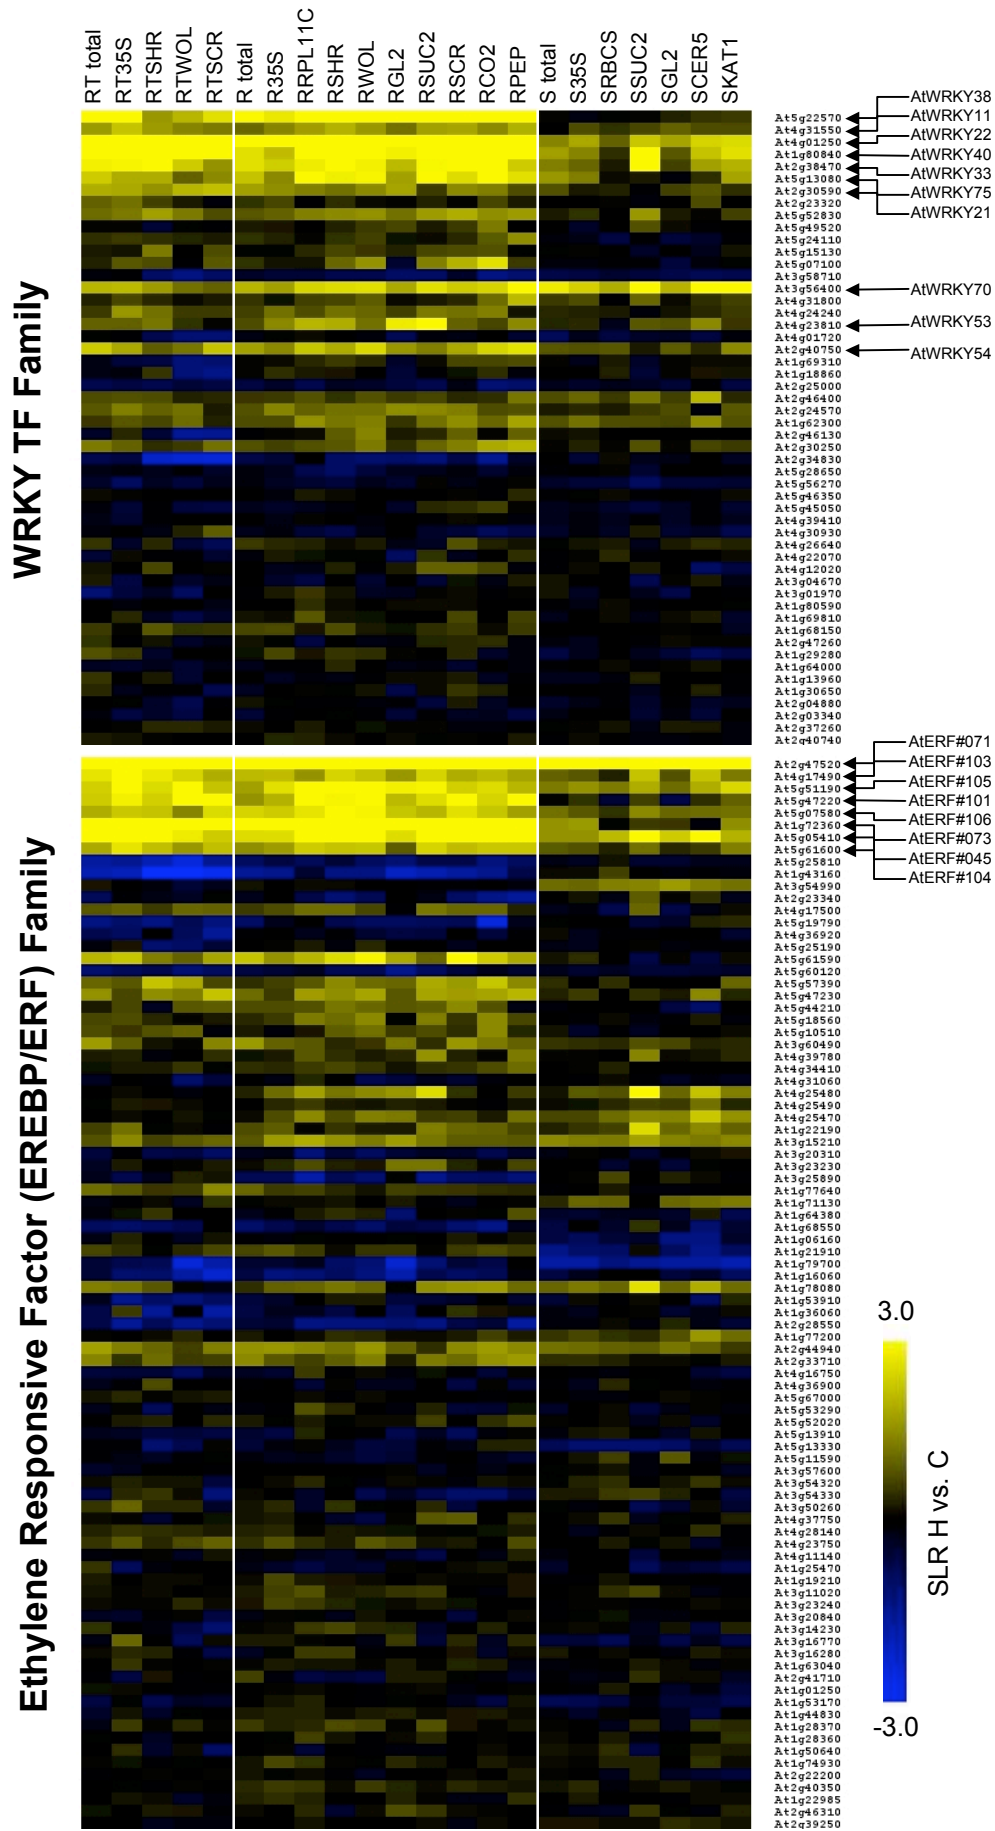

**Fig. S13C, D**

**C**

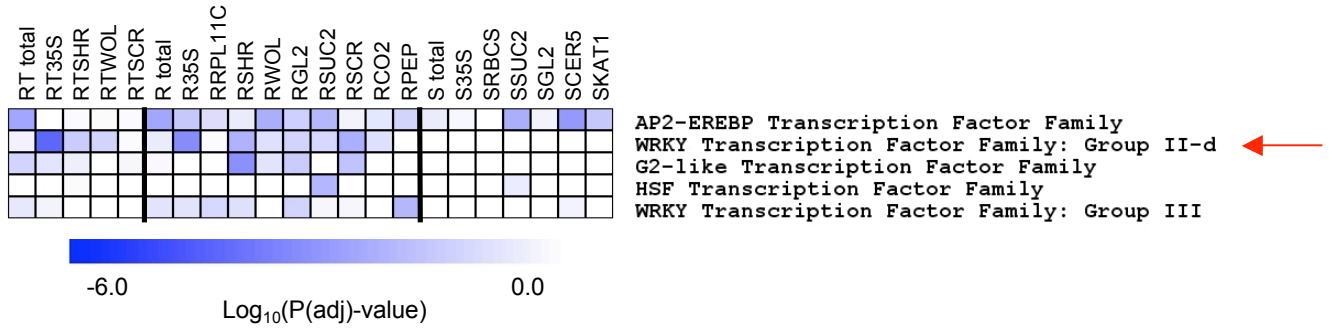

**D**

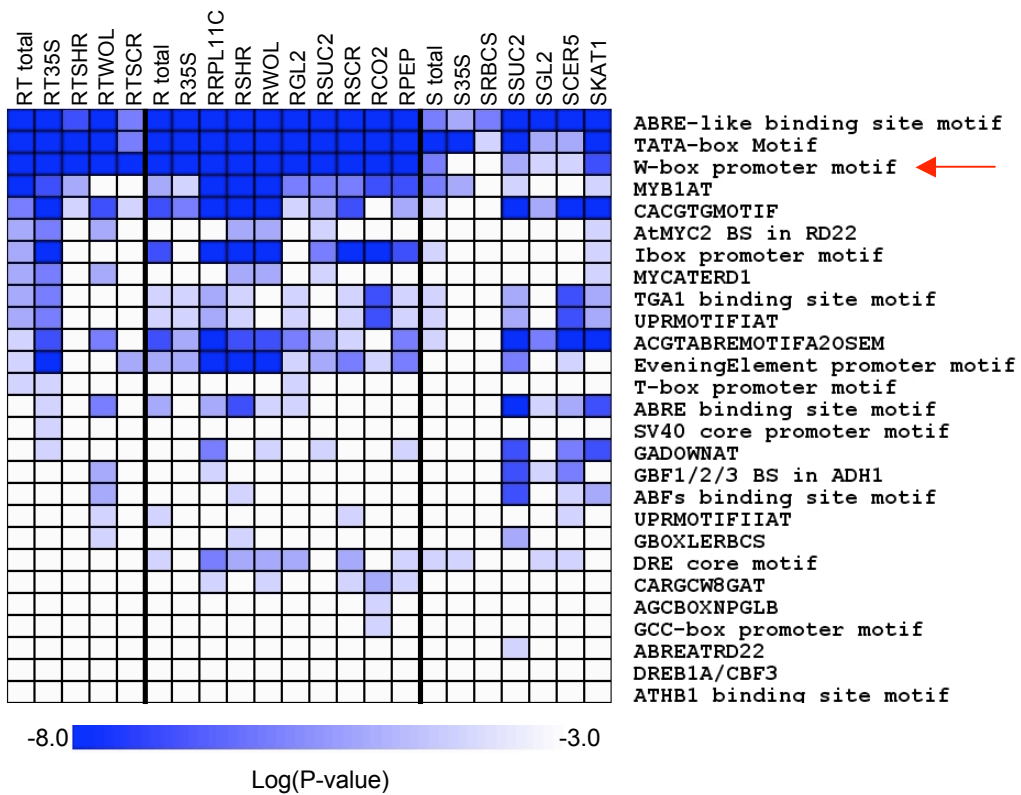

**Fig. S14.** Plasticity in transcription factor mRNAs - ribosome association: Cell specificity and hypoxic induction. (A) Levels of polysomal mRNA of 1,200 expressed TFs in 7-d-old seedlings under control and hypoxia stress. TF order was organized by hierarchical clustering in MEV. Data values are scaled RMA normalized data, with control (*Left*) and hypoxia (*Right*) data shown in paired columns for each promoter used to obtain a specific mRNA population. (B) Level of induction of transcription factors, organized by TF families, in 7-d-old seedlings under hypoxia stress. Data values are signal-log-ratios of hypoxic versus control expression for each transcriptome and were organized by hierarchical clustering in MEV.

Fig. S14A

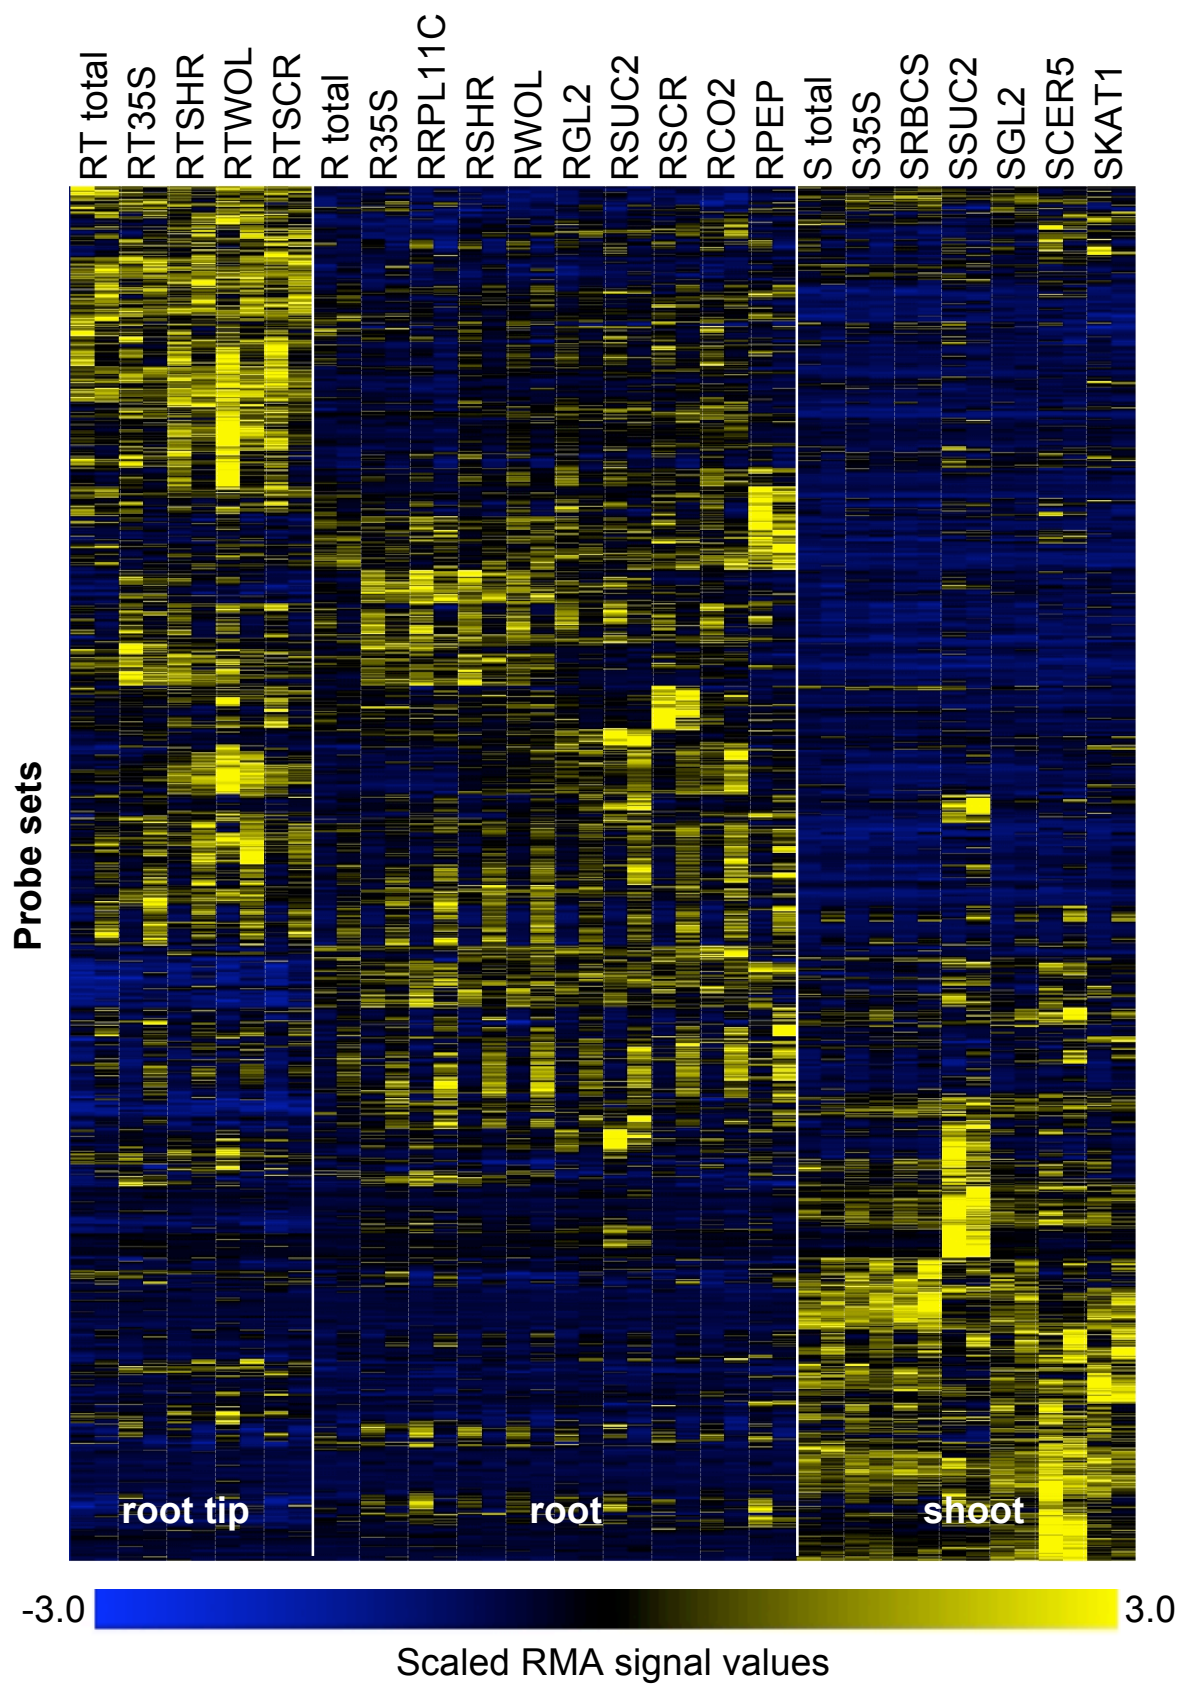

**Fig. S14B**

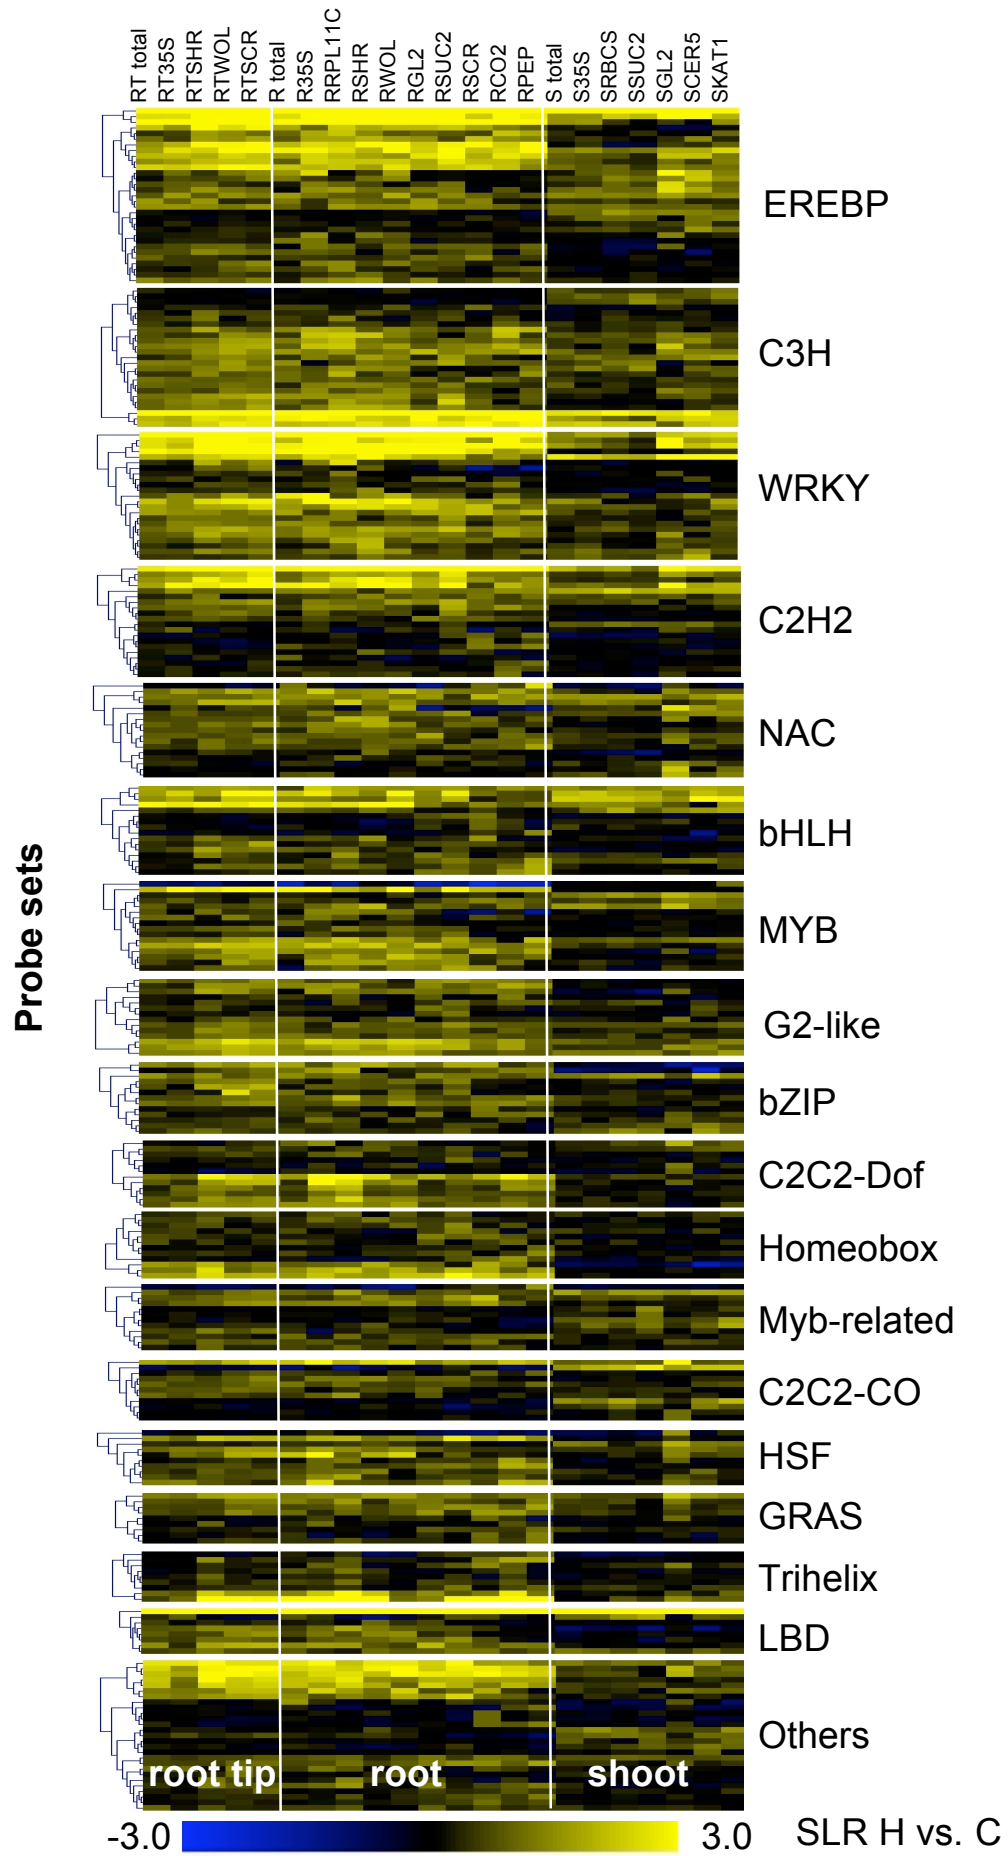

**Fig. S15.** Immunopurified polysomal mRNA populations are distinct in organs and regions of seedlings. Robust Multi-chip Average (RMA)-normalized expression values of the 129 ATH1 GeneChips used in this study were grouped by hierarchical clustering, based on Pearson correlation distance. Individual samples clustered first by organ, then by treatment, and then by cell type, except in the shoot, where some mRNA populations (*pSUC2*, *pCER5*, *pKATI*) clustered first by cell type, and then by treatment. All biological replicates grouped together. Sample labels are organ (R, root; RT, root tip; S, shoot; WS, whole seedling) followed by the promoter used to drive FLAG-RPL18 or Tot (total mRNA), and bioreplicate number (1-3). Whole seedling data from Branco-Price et al. (6) which evaluated four treatments (2hH, 2 h hypoxia; 9hH, 9 h hypoxia; R, 2hH plus 1 h reoxygenation) and two mRNA populations (T, total mRNA or 35S, immunopurified). Red arrows indicate branches that separate treatments. Promoter abbreviations correspond to names in Table 1.

Fig. S15

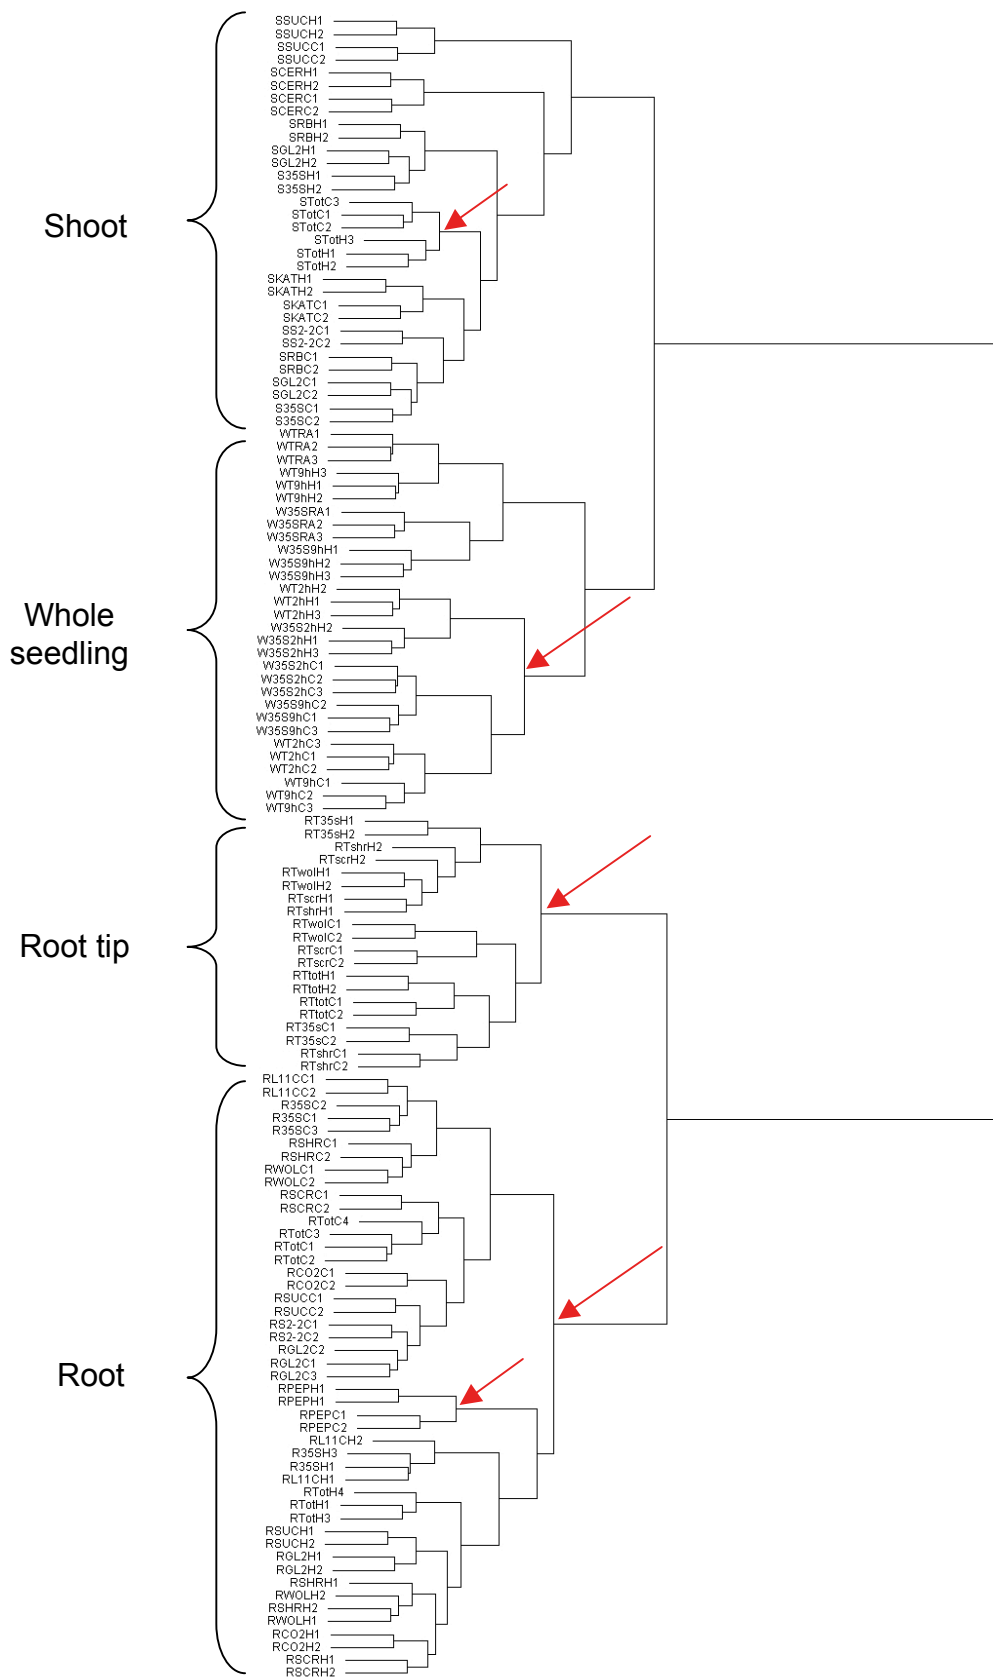

**Table 1.** Primers used

| Primer name     | Sequence (5' → 3')                           |
|-----------------|----------------------------------------------|
| <b>Cloning</b>  |                                              |
| SHR fw          | <u>CACCGGACAAAGAAGCAGAGCGTGG</u>             |
| SHR rev         | TTAATGAATAAGAAAATGAATAGAAGAAAGGGAGACCCAC     |
| SCR fw          | <u>CACCGGATAAGGGATAGAGGAAGAGG</u>            |
| SCR rev         | GGAGATTGAAGGGTTGTTGGTTCG                     |
| WOL fw          | <u>CACCTACTGTCTCTAAGCGCACG</u>               |
| WOL rev         | CTGAGCTACAACAATAGAGAACAAAAGAAG               |
| SULTR2;2 fw     | <u>CACCGACCAAAGAATCCTACGTACC</u>             |
| SULTR2;2 rev    | GTGGGTTATTGAAGTGTGTGATAGGG                   |
| CER5 fw         | <u>CACCTTTAGTTTGCTTGAGTTCTCATGGAAG</u>       |
| CER5 rev        | TGTTTTTGTGTTGATCTTGAAAAAGATC                 |
| CO2 fw          | <u>CACCTAACTCCATTATTTACGACTGTGCCAC</u>       |
| CO2 rev         | AAACTCTTGTTGCATTATTGTCAAATCCTT               |
| GL2 fw          | <u>CACCGTTTCCTTCACTATACGTCTTCGTCC</u>        |
| GL2 rev         | CTGTCCCTAGCTAGCTTCTTTGC                      |
| RBCS1A fw       | <u>CACCCCTTACGAGGAGCTTGAGCTTCAATG</u>        |
| RBCS1A rev      | GTTCTTCTTACTCTTTGTGTGACTGAGG                 |
| KAT1 fw         | <u>CACCTCTCATATAAATCATGCCGACATTACAC</u>      |
| KAT1 rev        | AGAGATCGACATCTTTTTGATGATCT                   |
| PEP fw          | <u>CACCCGATGTTCCACCATGCAAAAGT</u>            |
| PEP rev         | GGTTTTGGCTAATGTGATTGTGTAGA                   |
| SUC2 fw         | <u>CACCAAGTTACTTTCTATTATTAAGTGTATAATGG</u>   |
| SUC2 rev        | ATTTGACAAACCAAGAAAGTAAGAAAAAAAAG             |
| sGFP fw         | GACTGGATCCATGGTGAGCAAGGGCGAGGAG              |
| sGFP rev        | GTCAGGATCCCTGTACAGCTCGTCCATGCC               |
| Omega-KpnI fw   | CGAC <u>CGTACCT</u> ATTTTTACAACAATTACCAACAAC |
| L18-XbaI rev    | GCTCTAGATTAACCTTGAATCCACGACTC                |
| <b>Tail PCR</b> |                                              |
| RB1 (step 1)    | TCATGTCATAGCTGTTTCCTGTGTG                    |
| RB2 (step 2)    | CTGTGTGAAATTGTTATCCGCTCAC                    |
| RB3 (step 3)    | AGCCGGAAGCATAAAGTGTAAGC                      |
| Kan1 (step 1)   | CTATCAGGACATAGCGTTGGCTACC                    |
| Kan2 (step 2)   | CTACCCGTGATATTGCTGAAGAGC                     |
| Kan3 (step 3)   | CTTCTATCGCCTTCTTGACGAGTTC                    |
| AD1             | NTCGASTWTSWGTT                               |
| AD2             | NTGCGASWGANAWGAA                             |
| AD3             | WGTGNAGWANCANAGA                             |
| AD4             | STTGNTASTNCTNTGC                             |
| AD5             | TGWGNAGSANCASAGA                             |
| AD6             | AGWGNAGWANCAWAGG                             |
| AD7             | AWGCANGNCWGANATA                             |
| AD8             | CGSATSTCSAANAAWAT                            |
| AD9             | CGTGNAGWANCNAAG                              |
| AD10            | NCTAGWASTWGSTTG                              |
| AD11            | NTGGCGWSATNTSATA                             |
| AD12            | NWGSTTMGAACNCGCT                             |
| AD13            | SSTGGSTANATWATWCT                            |
| AD14            | WCGWWGAWCANGNCGA                             |
| AD15            | WGCNAGTNAGWANAAG                             |
| AD16            | WGGWANCWGAWANGCA                             |



**Table 2.** Characterization of T-DNA insertion sites in homozygous *p:FLAG-RPL18* lines

| Transgenic Line                     | Target Cell Population                                    | Promoter reference | AGI of promoter source | Length of 5' flanking region from the initiator ATG per TIGR (bp) | Line used for array studies | Chromosome of T-DNA insertion (AGI framework site) | AGI locus at or near T-DNA insertion      | Orientation of transgene relative to AGI locus near insertion | Hybridizations root tip | Hybridizations root | Hybridizations shoot |
|-------------------------------------|-----------------------------------------------------------|--------------------|------------------------|-------------------------------------------------------------------|-----------------------------|----------------------------------------------------|-------------------------------------------|---------------------------------------------------------------|-------------------------|---------------------|----------------------|
| <i>p35S:FLAG-RPL18</i>              | Near constitutive (total RNA)                             | [8]                |                        | 1,343                                                             | 12-2-1                      | Chr5 (24334454)                                    | 3' of At5g60460                           | reverse                                                       | 2xC, 2xH                | 4xC, 3xH            | 3xC, 3x              |
| <i>p35S:FLAG-RPL18</i>              | Near constitutive (IP'd RNA)                              | [8]                |                        | 1,343                                                             | 12-2-1                      | Chr5 (24334454)                                    | 3' of At5g60460                           | reverse                                                       | 2xC, 2xH                | 3xC, 2xH            | 2xC, 2x              |
| <i>pSCR:FLAG-RPL18</i>              | Root endodermis, quiescent center                         | [31]               | At3g54220              | 2,118                                                             | 19-8-3                      | Chr3 (12603473)                                    | 5' flanking At3g30842                     | reverse                                                       | 2xC, 2xH                | 2xC, 2xH            |                      |
| <i>pSHR:FLAG-RPL18</i>              | Root vasculature                                          | [32]               | At4g37650              | 2,505                                                             | 10-1-2                      | Chr1 (5484948)                                     | First intron of At1g15960                 | reverse                                                       | 2xC, 2xH                | 2xC, 2xH            |                      |
| <i>pWOL:FLAG-RPL18</i>              | Root vasculature                                          | [33]               | At2g01830              | 2,085                                                             | 7-1-1                       | Chr3 (22701280)                                    | Within At3g61300                          | forward                                                       | 2xC, 2xH                | 2xC, 2xH            |                      |
| <i>pGL2:FLAG-RPL18</i>              | Root atrichoblast epidermis, shoot trichomes <sup>1</sup> | [1,2]              | At1g79840              | 2,059                                                             | 38-4                        | Chr3 (18988245)                                    | 3' of At3g51090                           | forward                                                       |                         | 2xC, 2xH            | 2xC, 2x              |
| <i>pGL2:FLAG-RPL18</i> <sup>2</sup> | Root atrichoblast epidermis, shoot trichomes <sup>1</sup> | [1,2]              | At1g79840              | 2,059                                                             | 16-4                        | Chr4 (7992964)                                     | 5' flanking At4g13770                     | forward                                                       |                         | 1xC <sup>2</sup>    |                      |
| <i>pCO2:FLAG-RPL18</i>              | Root cortex meristematic zone                             | [34]               | At1g62500              | 586                                                               | 1-7                         | ND                                                 |                                           |                                                               |                         |                     |                      |
| <i>pPEP:FLAG-RPL18</i>              | Root cortex elongation and maturation zone                | [35]               | At1g09750              | 1,667                                                             | 5-11                        | Chr4 (10801442)                                    | 5' flanking At4g19925                     | reverse                                                       |                         | 2xC, 2xH            | 2xC, 2x              |
| <i>pRPL11C:FLAG-RPL18</i>           | Root proliferating cells                                  | [36]               | At4g18730              | 1,000                                                             | 10-1-2                      | Chr5 (24334451)                                    | 3' of At5g60460                           | reverse                                                       |                         | 2xC, 2xH            |                      |
| <i>pSUC2:FLAG-RPL18</i>             | Root and shoot phloem companion cells                     | [37]               | At1g22710              | 2,097                                                             | 16-8                        | ND <sup>3</sup>                                    |                                           |                                                               |                         | 2xC, 2xH            |                      |
| <i>pSULTR2;2:FLAG-RPL18</i>         | Root phloem companion cells, shoot bundle sheath          | [3]                | At1g77990              | 1,962                                                             | 1-3-9                       | Chr3 (10009685)                                    | 5' flanking At3g27140                     | reverse                                                       |                         | 2xC                 |                      |
| <i>pCER5:FLAG-RPL18</i>             | Cotyledon and leaf epidermis                              | [38]               | At1g51500              | 2,614                                                             | 25-2                        | Chr1 (19224463);<br>Chr1 (6771552)                 | 3' of At1g51805;<br>5' flanking At1g19560 | reverse;<br>reverse                                           |                         |                     | 2xC, 2x              |
| <i>pKAT1:FLAG-RPL18</i>             | Cotyledon and leaf guard cells                            | [39]               | At5g46240              | 3,410                                                             | 23-4                        | ND                                                 |                                           |                                                               |                         |                     | 2xC, 2x              |
| <i>pRBCS:FLAG-RPL18</i>             | Shoot photosynthetic                                      | [40]               | At1g67090              | 1,976                                                             | 9-11                        | Chr3 (<519301)                                     | 5' of At3g02500                           | forward                                                       |                         |                     |                      |

*p35S*: Cauliflower mosaic virus 35S; *pRPL11C*, RIBOSOMAL PROTEIN L11C; *pSCR*, SCARECROW; *pWOL*, WOODENLEG; *pSUC2*, SUCROSE TRANSPORTER 2; *pSULTR2;2*, SULPHATE TRANSPORTER 2; *pGL2*, GLABRA2; *pCO2*, Cortex specific transcript; *pPEP*, plastid endopeptidase; *pRBCS1A*, RIBULOSE BIPHOSPHATE CARBOXYLASE SMALL CHAIN 1A; *pCER5*, ABC TRANSPORTER ABCG SUBFAMILY 12; *pKAT1*, POTASSIUM CHANNEL IN ARABIDOPSIS THALIANA 1. C, control treatment; H, 2 h hypoxia stress treatment; ND, insertion was not successfully determined by TAIL-PCR or inverse PCR. <sup>1</sup>*pGL2* was expressed in the targeted cell population as well as in the phloem companion cells. <sup>2</sup>Hybridization with RNA from a second independent transgenic line with the insertion site of T-DNA in a different genomic location. <sup>3</sup>Insertion was defined as two side-by-side insertions of the T-DNA but Tail-PCR inside genomic region was not possible.

## Supplemental Datasets

**Dataset S1 (XLS): Normalized Microarray Data.** Sheet *a*, Present calls. PMA values, obtained by use of the MAS5 algorithm in R, were transformed into numerical values as follows: 0=A=absent; 1=M=marginal; 2=P=present. The mean of the PMA value was calculated for the biological replicates for each probe pair set. The maximum number across all samples (root, shoot, root tip, C and H, all cell types) was recorded and shows if a gene was present in at least one sample set. For all subsequent analyses and tables we excluded the 219 organelle-encoded genes and the 5,123 genes that did not have at least one P (=maxP<2) across all sample sets. Sheet *b*, List of 6657 genes with a present call in all samples. Sheet *c*, GO term enrichment of genes from sheet *b*. Sheet *d*, The mean of RMA normalized expression values was calculated for the replicates. Sheet *e*, The mean of RMA normalized expression values, unlogged. Sheet *f*, Correlation coefficients ( $R^2$  values) from comparison of RMA normalized signal values from individual hybridizations. Values highlighted in yellow compare biological replicate samples.

**Dataset S2 (XLS): Differential Gene Expression Analysis of mRNA Populations from Different Cell Types.** Sheets *a--e*, The goal of the comparison was to identify genes transcripts that are enriched in specific mRNA populations as compared to other populations isolated from the same organ or region. RMA raw data were used to perform comparisons between cell types by use of LIMMA (R). Within one organ, non-overlapping cell types were compared (see sheet *b* “queries” for the specific comparisons). Comparisons were done only for the control (C) data, and separately for hypoxia data. For some cell types (vasculature in roots, epidermis and vasculature in shoots), two different stringencies were applied (sheet *e*, “additional queries”). Selection criteria for significantly enriched gene transcripts for each pairwise comparison: >2-fold change; FDR <0.01. The number of significantly enriched genes found in each pairwise comparison is given in sheet *d*. The overlap of the pairwise

comparisons was recorded. Individual columns in sheet *a* indicate the genes that were significantly higher or lower in the mRNA population sampled with a specific *p:FLAG-RPL18* construct. Additionally, the mean of the SLRs and the mean of the FDRs of all utilized comparisons were calculated. Sheet *c* contains numbers of enriched or depleted genes for each cell type and comparison variant, and additional comparisons to literature cell-type data (21--25). Sheets *f--k*, GO and TF family enrichment analysis of enriched gene lists for different cell types. GO term enrichment was calculated with the GOHyperGAll function (27). First, all GOs that were significantly enriched in a gene list ( $\text{Padj} < 0.05$ ) were recorded. Second, the overlapping GO categories were reduced to remove nested GO terms with the Simplify variant of the GOHyperGAll function. TF enrichment was calculated accordingly, after obtaining TF family gene lists from TAIR and AGRIS (30). Clusters with fewer than 10 genes were not evaluated for GO enrichment. Sheet *k*, log-transformed adjusted P-values of GO term enrichment that were used to make Fig. 2B and Fig. S6.

**Dataset S3 (XLS): Analysis to Identify Genes That Are Enriched in Multiple Cell Types (Sampled mRNA Populations).** Fuzzy k-means clustering was done with the mean of replicates of RMA normalized values, after filtering out low-varying genes, by use of the FANNY function with the following settings: membership exponent = 1.1, cluster number = 60, cluster collapsing with HC = 0.05, membership coefficients cut off (probability to belong to a cluster) = 0.4. Clustering was done for control (C) data, and separately for hypoxia (H) data. For control samples, 17,468 genes were used for filtering, 11,273 genes were used for clustering, 257 genes did not belong to any cluster, and 362 genes belong to two clusters. Scaled values of RMA normalized data are added for easier visualization of cluster patterns, as well as median expression values of each cluster are presented in sheet *b*. Data were used to prepare Fig. 2. Sheets *c* and *d*, GO and TF family enrichment analysis of fuzzy clusters. GO term enrichment was calculated with the GOHyperGAll function (27). First, all GOs that

were significantly enriched in a gene list ( $P_{adj} < 0.05$ ) were recorded. Second, the overlapping GO categories were reduced to remove nested GO terms with the Simplify variant of the GOHyperGAll function. TF enrichment was calculated accordingly, after obtaining TF family gene lists from TAIR and AGRIS (30). Clusters with fewer than 10 genes were not evaluated for GO enrichment.

**Dataset S4 (XLS): Comparison of Significantly Enriched mRNAs in mRNA Populations Determined by Others, and This Study.** Gene lists from the present study are from Dataset S2, and are labeled with (A). Literature gene lists are from the following sources, and labeled with (B): root cell types (25); shoot epidermis (21); guard cells (22); trichomes (23); shoot vasculature (24). For all experiments, published .CEL files were used for a new RMA analysis to compare cell type samples to references samples (or to non-overlapping root cell types for ref. 25 according to the queries defined in sheet c) by LIMMA, regardless of different treatments, by use of the selection criteria  $>2$ -fold change; FDR  $< 0.01$ . For each of the gene lists, GO enrichment was analyzed by the function GOHyperGALL (27). The overlap between enriched GO lists for each comparison was determined and recorded in this file. Sheets *a--c*: root cell types; sheets *d--e*: shoot cell types.

**Dataset S5 (XLS): Differential Expression Analysis of the Hypoxic Response.** RMA raw data were used to do comparisons between H and C by use of LIMMA (R). Sheet *a* and *b*, For each cell type, a comparison of hypoxia versus control was performed, and the SLR and FDR were calculated. Genes that were significantly changed due to hypoxic stress were selected with the criteria:  $>2$ -fold change; FDR  $< 0.01$ . The “Core” response (ubiquitous hypoxia-response) genes were defined as genes that were significantly induced or reduced in all cell types of an organ. Sheet *a* shows number of hypoxia induced or reduced genes for each cell type. Sheets *c--f*, GO and TF family enrichment analysis of the hypoxic response. GO term

enrichment was calculated with the GOHyperGAll function (27). First, all GOs that were significantly enriched in a gene list ( $P_{adj} < 0.05$ ) were recorded. Second, the overlapping GO categories were reduced to remove nested GO terms with the Simplify variant of the GOHyperGAll function. Enriched GO terms of hypoxia induced genes that occur in multiple cell types are marked with blue. TF enrichment was calculated accordingly, after obtaining TF family gene lists from TAIR and AGRIS (30). Clusters with fewer than 5 genes were not evaluated for GO enrichment. Sheet *g*, log-transformed adjusted P-values for GO term enrichment that were used to make Fig. S9. Sheets *h--l*, "reduced genes": selection of genes that show cell specificity under control conditions (see Dataset S2 for details) AND are significantly reduced under H in that cell type. Sheets *m--o*, "hypoxic genes": selection of genes that show cell specificity under control conditions (see Dataset S2 for details) AND are hypoxia-induced in total RNA in the same organ.

**Dataset S6 (XLS): Analysis to Identify Genes that are Differentially Changed During Hypoxia Between Cell Types (Sampled mRNA Populations).** Sheets *a* and *b*, Fuzzy k-means clustering was done with the mean of replicates of RMA normalized values, by use of the FANNY function with the following settings: membership exponent = 1.1, cluster number = 100, cluster collapsing with HC = 0.05, membership coefficients cut off (probability to belong to a cluster) = 0.4. For clustering, only genes were selected that showed significant up- or down-regulation due to hypoxia in any cell type or organ (see Dataset S5 for details). 6,461 genes were used for clustering, 255 genes did not belong to any cluster, and 174 genes belong to two clusters. Scaled values of RMA normalized data are added for easier visualization of cluster patterns, as well as median expression values of each cluster are presented in sheet *b*. Data were used to prepare Fig. 3. Sheets *c* and *d*, For each cluster from fuzzy-k-mean clustering, GO term enrichment was analyzed with the GOHyperGAll function (27). First, all GOs that were significantly enriched in a gene list ( $P_{adj} < 0.05$ ) were recorded. Second, the

overlapping GO categories were reduced to remove nested GO terms with the Simplify variant of the GOHyperGAll function. TF enrichment was calculated accordingly, after obtaining TF family gene lists from TAIR and AGRIS (30). Clusters with fewer than 10 genes were not evaluated for GO enrichment.

**Dataset S7 (XLS): Differential Gene Expression Analysis of SLR H vs. C Between Cell**

**Types.** Sheets *a--d*, The goal of the comparison was to identify genes transcripts that are differentially changed due to hypoxia in specific mRNA populations as compared to other populations isolated from the same organ or region. RMA raw data were used to do comparisons between cell types AND stresses by use of LIMMA (R) and the following formula:  $(CT(\text{hypoxia})-CT(\text{control}))-(\text{ref}(\text{hypoxia})-\text{ref}(\text{control}))$ , while “ref” means all non-overlapping cell types (comparisons see sheet *b* “queries”). Selection criteria for significantly enriched gene transcripts for each pairwise comparison: >2-fold change; FDR <0.01. The number of significantly enriched genes for each cell type is given in sheet *c*. The overlap of all gene lists was recorded. Individual columns in sheet *a* indicate the genes that were significantly higher or lower induced during hypoxia in the mRNA population sampled with a specific *p:FLAG-RPL18* construct. Additionally, the mean of the SLRs and the mean of the FDRs of all utilized comparisons were calculated. Sheet *d* contains numbers of enriched or depleted genes for pairwise comparison. Sheets *e--h*, GO and TF family enrichment analysis of the cell-type specific hypoxic response. GO term enrichment was calculated with the GOHyperGAll function (27). First, all GOs that were significantly enriched in a gene list ( $\text{Padj}<0.05$ ) were recorded. Second, the overlapping GO categories were reduced to remove nested GO terms with the Simplify variant of the GOHyperGAll function. TF enrichment was calculated accordingly, after obtaining TF family gene lists from TAIR and AGRIS (30). Clusters with fewer than 10 genes were not evaluated for GO enrichment.
